# Supplementary material for: Neutral chiral cyclopentadienyl Ru(ii)Cl catalysts enable enantioselective [2+2]-cycloadditions
Source: Royal Society of Chemistry journal article supplement (doi:10.1039/c6sc05092a), 2017-01-01

# **Neutral Chiral Cyclopentadienyl Ru(II)Cl Catalysts Enable Enantioselective [2+2]-Cycloadditions**

David Kossler and Nicolai Cramer

Ecole Polytechnique Fédérale de Lausanne, SB ISIC LCSA, BCH 4305, CH-1015 Lausanne,  
Switzerland

e-mail: nicolai.cramer@epfl.ch

## **Supplementary Information**

|                          |                                                          |            |
|--------------------------|----------------------------------------------------------|------------|
| <b>Table of Content:</b> | <b>General Methods</b>                                   | <b>S2</b>  |
|                          | <b>Experimental procedures and characterization data</b> | <b>S3</b>  |
|                          | <b>Spectra</b>                                           | <b>S38</b> |

## General Methods

All reactions were carried out under an atmosphere of nitrogen in oven-dried glassware with magnetic stirring, unless otherwise indicated. THF and dichloromethane were purified by a Innovative Technology Solvent Delivery System. Chemicals were used as obtained from the suppliers. Flash chromatography was performed with Silicycle silica gel 60 (0.040-0.063  $\mu\text{m}$  grade) or neutral alumina (Fluka, Brockmann activity 1). Analytical thin-layer chromatography was performed with commercial glass plates coated with 0.25 mm silica gel (E. Merck, Kieselgel 60 F254). Compounds were either visualised under UV-light at 254 nm or by dipping the plates in an aqueous potassium permanganate solution followed by heating. Proton nuclear magnetic resonance ( $^1\text{H}$ -NMR) data were acquired at 400 MHz on a Bruker AV400 and Bruker DRX600 (600 MHz) spectrometer. Chemical shifts ( $\delta$ ) are reported in parts per million (ppm) relative to residual chloroform (s, 7.26 ppm),  $\text{CD}_2\text{Cl}_2$  (t, 5.32 ppm) and  $\text{CD}_3\text{CN}$  (quint, 1.94 ppm). Splitting patterns are designated as s, singlet; d, doublet; t, triplet; q, quartet; sept, septet; m, multiplet, br, broad. Proton decoupled Carbon-13 nuclear magnetic resonance ( $^{13}\text{C}$ -NMR) data were acquired at 100 MHz on a Bruker AV400 spectrometer. Chemical shifts are reported in ppm relative to  $\text{CDCl}_3$  (77.16 ppm),  $\text{CD}_2\text{Cl}_2$  (54.0 ppm) and  $\text{CD}_3\text{CN}$  (1.32 ppm). Proton decoupled Phosphorus-31 nuclear magnetic resonance ( $^{31}\text{P}$ -NMR) were acquired at 160 MHz on a Bruker AV400 spectrometer. Infrared (IR) data were recorded on an Alpha-P Bruker FT-IR Spectrometer. Absorbance frequencies are reported in reciprocal centimeters ( $\text{cm}^{-1}$ ). HRMS measurements were performed by an Agilent LC-MS TOF. High resolution mass are given in  $m/z$ . Optical rotations were measured on a Polartronic M polarimeter using a 0.5 cm cell with a Na 589 nm filter. X-ray analysis was performed by Dr. R. Scopelliti at the EPF Lausanne.

## Experimental procedures and characterization data

### Phenyl-Ligand synthesis:

#### 3,3'-diphenyl-[1,1'-binaphthalene]-2,2'-dicarboxylic acid (**7**):

In an oven dried vial were weighted **6** (50 mg, 146  $\mu$ mol, 1.0 equiv.), Pd(OAc)<sub>2</sub> (3.28 mg, 15.0  $\mu$ mol, 10 mol%), Ac-Gly-OH (3.42 mg, 29.0  $\mu$ mol, 20 mol%), Ag<sub>2</sub>CO<sub>3</sub> (44.3 mg, 161  $\mu$ mol, 1.1 equiv.) and K<sub>2</sub>CO<sub>3</sub> (20.2 mg, 146  $\mu$ mol, 1.0 equiv.). The vial was stoppered, evacuated and backfilled with nitrogen. Iodobenzene (98.0  $\mu$ L, 876  $\mu$ mol, 6.0 equiv.) and acetic acid (50.2  $\mu$ L, 876  $\mu$ mol, 6.0 equiv.) were added *via* syringe and the resulting mixture degassed by three pump-freeze-thaw cycles. The mixture was heated to 90 °C for 30 h protected from light, and monitored by negative mass spec analysis of an aliquot. After cooling down to 23 °C, 1 M HCl was added and the mixture filtered over a pad of silica eluting with ethyl acetate to remove metal particles. The filtrate was extracted with ethyl acetate (3x), the combined organic layer was dried over Na<sub>2</sub>SO<sub>4</sub> and the solvent was removed under reduced pressure. Purification by silica gel column chromatography (pentane/EtOAc 3:1 to pentane/EtOAc 1:2 with 1% AcOH) delivered **7** (49.8 mg, 69% yield) as brown solid.

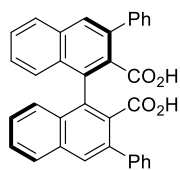

**<sup>1</sup>H NMR** (400 MHz, CDCl<sub>3</sub>)  $\delta$  (ppm) = 8.00 (s, 2H), 7.92 (d, *J* = 8.2 Hz, 2H), 7.55 – 7.48 (m, 6H), 7.42 (t, *J* = 7.4 Hz, 4H), 7.40 – 7.36 (m, 2H), 7.29 – 7.25 (m, 2H), 7.08 (d, *J* = 8.6 Hz, 2H); **<sup>13</sup>C NMR** (101 MHz, CDCl<sub>3</sub>)  $\delta$  (ppm) = 172.1, 140.0, 136.4, 133.8, 133.0, 132.2, 131.3, 130.5, 128.8, 128.7, 128.3, 128.2, 128.0, 127.8, 126.8; **IR (ATR):**  $\tilde{\nu}$  3025, 2924, 1655, 1370, 1267, 1231, 751, 699 cm<sup>-1</sup>; **HRMS (ESI)** calculated for [C<sub>34</sub>H<sub>22</sub>O<sub>4</sub>-H]<sup>-</sup>: 493.1445, found: 493.1443; **R<sub>f</sub>**: 0.10 (pentane/EtOAc 1:1 + 1% AcOH); **m.p.**: 193 °C; **[ $\alpha$ ]<sub>D</sub><sup>20</sup>**: + 23.3° (c = 0.3, CHCl<sub>3</sub>).

#### (3,3'-diphenyl-[1,1'-binaphthalene]-2,2'-diyl)dimethanol (**7-OH**):

**7** (400 mg, 806  $\mu$ mol, 1.0 equiv.) was weighted in an oven dried vial. The vial was stoppered, evacuated and backfilled with nitrogen. THF (5 mL) was added followed by slow addition of BH<sub>3</sub>-THF (1 M in THF, 4.0 mL, 4.0 mmol, 5.0 equiv) at 0 °C. The mixture was stirred at 65 °C for 18 h. After cooling down to 0 °C, water was added carefully, followed by 1 M HCl. The aqueous layer was extracted with ethyl acetate (3x), the combined organic layer was dried over Na<sub>2</sub>SO<sub>4</sub> and the solvent was removed under reduced pressure. Purification by silica gel column chromatography (pentane/EtOAc 4:1) delivered **7-OH** (339 mg, 90% yield) as white solid.

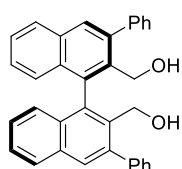

**<sup>1</sup>H NMR** (400 MHz, CDCl<sub>3</sub>) δ (ppm) = 7.95 (s, 2H), 7.93 (d, *J* = 8.2 Hz, 2H), 7.71 – 7.66 (m, 4H), 7.49 (ddd, *J* = 8.1, 6.8, 1.2 Hz, 2H), 7.46 – 7.36 (m, 6H), 7.29 – 7.24 (m, 2H), 7.05 (dd, *J* = 8.6, 1.1 Hz, 2H), 4.39 (d, *J* = 11.3 Hz, 2H), 4.15 (d, *J* = 11.3 Hz, 2H), 3.06 (s, 2H); **<sup>13</sup>C NMR** (101 MHz, CDCl<sub>3</sub>) δ (ppm) = 141.6, 141.2, 136.7, 135.9, 133.1, 132.6, 130.0, 129.9, 128.3, 128.2, 127.5, 126.8, 126.7, 126.4, 60.1; **IR (ATR):**  $\tilde{\nu}$  3211, 3057, 1493, 1026, 1018, 892, 766, 750, 702 cm<sup>-1</sup>; **HRMS (ESI)** calculated for [M-OH]<sup>+</sup> equals to [C<sub>34</sub>H<sub>25</sub>O]<sup>+</sup> : 449.1900, found: 449.1866; **R<sub>f</sub>**: 0.50 (pentane/EtOAc 4:1); **m.p.**: 181-182°C; **[α]<sub>D</sub><sup>20</sup>**: + 76.8° (c = 1.0, CHCl<sub>3</sub>).

2,2'-bis(bromomethyl)-3,3'-diphenyl-1,1'-binaphthalene (**8**):

**7-OH** (284 mg, 609 μmol, 1.0 equiv.) was weighted in an oven dried flask. The vial was stoppered, evacuated and backfilled with nitrogen. THF (6 mL) was added followed by slow addition of PBr<sub>3</sub> (57.4 μL, 609 μmol, 1.0 equiv) at 0 °C. The mixture was stirred at this temperature for 5 h. Aq. sat. NaHCO<sub>3</sub> solution was added and diluted with ethyl acetate. The aqueous layer was extracted with ethyl acetate (3x), the combined organic layer was dried over Na<sub>2</sub>SO<sub>4</sub> and the solvent was removed under reduced pressure to yield pure **8** (358 mg, 99% yield) as white solid. Purification by silica gel column chromatography (dry load, pentane/EtOAc 15:1) was performed for characterisation.

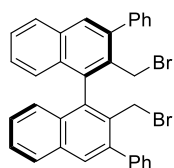

**<sup>1</sup>H NMR** (400 MHz, CDCl<sub>3</sub>) δ (ppm) = 7.97 – 7.89 (m, 4H), 7.68 – 7.61 (m, 4H), 7.56 – 7.42 (m, 8H), 7.30 (ddd, *J* = 8.2, 6.8, 1.3 Hz, 2H), 7.23 – 7.14 (m, 2H), 4.34 – 4.25 (m, 4H); **<sup>13</sup>C NMR** (101 MHz, CDCl<sub>3</sub>) δ (ppm) = 141.1, 140.6, 136.5, 133.3, 132.5, 132.0, 130.5, 129.7, 128.3, 128.0, 127.7, 127.5, 127.4, 126.7, 32.2; **IR (ATR):**  $\tilde{\nu}$  3056, 1494, 1217, 752, 702, 491 cm<sup>-1</sup>; **HRMS (ESI)** calculated for [M-Br]<sup>+</sup> equals to [C<sub>34</sub>H<sub>24</sub>Br]<sup>+</sup> : 511.1056, found: 511.1032; **R<sub>f</sub>**: 0.70 (pentane/EtOAc 6:1); **m.p.**: 173-175°C; **[α]<sub>D</sub><sup>20</sup>**: + 64.2° (c = 1.0, CHCl<sub>3</sub>).

In a flame dried schlenk flask were weighted **8** (358 mg, 604 μmol, 1.0 equiv.), NaH (60 % in mineral oil, 26.6 mg, 665 μmol, 1.1 equiv.) and 15-Crown-5 (266 μL, 1.33 mmol, 2.2 equiv). The vial was stoppered, evacuated and backfilled with nitrogen. THF (6 mL) was added followed by slow addition of NaCp (2 M in THF 332 μL, 665 μmol, 1.1 equiv) at 0 °C. The mixture was stirred at for 30 min, then aq. sat. NH<sub>4</sub>Cl solution was added carefully. The aqueous layer was extracted with ethyl acetate (3x), the combined organic layer was dried over Na<sub>2</sub>SO<sub>4</sub> and the solvent was removed under reduced pressure. Purification by silica gel column chromatography (dry load, pentane/EtOAc 30:1) delivered a 1.2:1 mixture of literature known compounds **9':9** (210 mg, 70% yield) as white solid (*JACS* 2013, **135**, 636, SI pages 7-8, 11). This mixture can be used for the ruthenium complexation described previously (*JACS*

2015, **137**, 12478, SI pages 14, 20-21) and the spiro compound **9'** re-isolated from the first DCM fractions of acidic alumina column after complexation.

2,6-Diphenyl-3,5-dihydrospiro[cyclohepta[1,2-a:7,6-a']dinaphthalene-4,1'-cyclopenta-[2,4]diene] (**9'**):

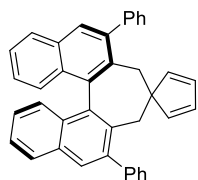

**<sup>1</sup>H NMR** (400 MHz, C<sub>6</sub>D<sub>6</sub>)  $\delta$  (ppm) = 7.87 (s, 2H), 7.81 (d,  $J$  = 8.1 Hz, 2H), 7.64 (d,  $J$  = 8.5 Hz, 2H), 7.33 - 7.25 (m, 6H), 7.15 - 7.04 (m, 5H), 5.98 - 5.95 (m, 2H), 5.72 - 5.67 (m, 2H), 2.82 (d,  $J$  = 13.2 Hz, 2H), 2.59 (d,  $J$  = 13.2 Hz, 2H); **<sup>13</sup>C NMR** (101 MHz, C<sub>6</sub>D<sub>6</sub>)  $\delta$  (ppm) = 142.9, 142.0, 140.9, 136.2, 135.7, 133.0, 132.2, 130.4, 129.7, 128.7, 128.4, 128.4, 127.6, 127.2, 126.3, 125.9, 68., 33.02; **IR (ATR):**  $\tilde{\nu}$  3051, 2923, 2856, 1600, 1588, 1493, 1445, 1422, 1403, 1369, 1329, 1244, 1214, 1140, 1075, 1052, 1023, 965, 955, 924, 893, 867, 854, 840, 817, 785, 763, 750, 743, 702 cm<sup>-1</sup>; **HRMS (ESI)** calculated for [C<sub>39</sub>H<sub>29</sub>]<sup>+</sup> : 497.2264, found: 497.2266; **R<sub>f</sub>**: 0.13 (pentane/EtOAc 40:1); **[ $\alpha$ ]<sub>D</sub><sup>20</sup>**: - 30.0° ( $c$  = 0.3, CH<sub>2</sub>Cl<sub>2</sub>).

5,16-Diphenyl-4,17-dihydro-1H-cyclopenta[6,7]cycloocta[2,1-a:3,4-a']dinaphthalene (**9**):

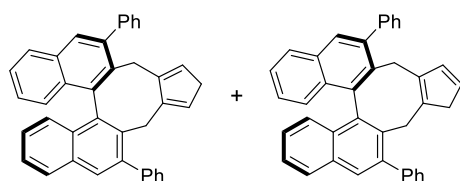

Double-bond isomers, ratio = 1.3:1.

**<sup>1</sup>H NMR** (400 MHz, C<sub>6</sub>D<sub>6</sub>)  $\delta$  (ppm) = 7.89 – 7.77 (m, 3H), 7.75 – 7.69 (m, 3H), 7.64 – 7.50 (m, 2H), 7.48 – 7.19 (m, 8H), 7.08 – 6.87 (m, 4H), 6.08 (d,  $J$  = 5.5 Hz, 0.6H), 6.04 (d,  $J$  = 5.3 Hz, 0.6H), 5.60 – 5.57 (m, 0.8H), 3.90 – 3.83 (m, 1.6H), 3.52 – 3.45 (m, 1H), 3.35 – 3.22 (m, 1.4H), 2.60 – 2.54 (m, 2H); **<sup>13</sup>C NMR** (101 MHz, C<sub>6</sub>D<sub>6</sub>)  $\delta$  (ppm) = 148.50, 145.28, 143.80, 142.64, 142.47, 142.15, 141.96, 141.75, 141.03, 140.87, 140.79, 140.45, 139.81, 137.94, 137.34, 136.87, 136.79, 136.28, 135.75, 135.43, 134.85, 134.47, 134.18, 133.55, 133.24, 132.89, 132.81, 132.66, 132.45, 132.38, 132.08, 132.03, 130.62, 130.51, 130.45, 130.24, 130.20, 130.03, 129.88, 129.25, 129.10, 127.54, 127.35, 127.29, 127.19, 126.61, 126.58, 126.53, 126.32, 126.09, 125.92, 125.71, 118.71, 46.19, 38.85, 33.42, 32.79, 31.55, 31.40; **IR (ATR):**  $\tilde{\nu}$  3054, 2970, 2923, 2900, 2205, 2161, 1493, 1446, 1407, 1393, 1379, 1258, 1221, 1074, 1066, 1055, 1027, 892, 868, 854, 803, 791, 763, 749, 701 cm<sup>-1</sup>; **HRMS (ESI)** calculated for [C<sub>39</sub>H<sub>29</sub>]<sup>+</sup> : 495.2118, found: 495.2109; **R<sub>f</sub>**: 0.10 (hexane:EtOAc, 40:1); **[ $\alpha$ ]<sub>D</sub><sup>20</sup>** = + 220 ( $c$  = 0.3, CH<sub>2</sub>Cl<sub>2</sub>).

## Complexes:

### Complex $\text{Cp}^X(\text{Ph})\text{Ru}(\text{nbd})\text{Cl}$ (**11**):

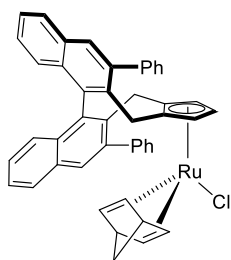

**$^1\text{H}$  NMR** (600 MHz,  $\text{CD}_2\text{Cl}_2$ )  $\delta$  (ppm) = 8.01 – 7.98 (m, 2H), 7.90 (d,  $J$  = 8.2 Hz, 1H), 7.87 (s, 1H), 7.64 (d,  $J$  = 7.6 Hz, 2H), 7.52 – 7.47 (m, 5H), 7.47 – 7.41 (m, 4H), 7.38 (td,  $J$  = 7.3, 1.3 Hz, 1H), 7.28 (ddd,  $J$  = 8.4, 6.8, 1.4 Hz, 1H), 7.19 (ddd,  $J$  = 8.4, 6.7, 1.4 Hz, 1H), 7.10 (d,  $J$  = 8.5 Hz, 1H), 6.86 (d,  $J$  = 8.6 Hz, 1H), 4.53 – 4.50 (m, 1H), 4.29 – 4.26 (m, 1H), 4.24 (t,  $J$  = 4.0 Hz, 1H), 4.19 – 4.15 (m, 2H), 3.93 – 3.89 (m, 1H), 3.73 (d,  $J$  = 15.7 Hz, 1H), 3.53 (t,  $J$  = 4.2 Hz, 1H), 3.46 (s, 1H), 3.41 – 3.31 (m, 2H), 3.19 (s, 1H), 3.15 (d,  $J$  = 15.6 Hz, 1H), 1.10 (dt,  $J$  = 8.9, 1.6 Hz, 1H), 1.03 (dt,  $J$  = 8.7, 1.6 Hz, 1H);  **$^{13}\text{C}$  NMR** (101 MHz,  $\text{CD}_2\text{Cl}_2$ )  $\delta$  (ppm) = 141.7, 141.4, 141.3, 140.6, 137.9, 136.6, 134.5, 134.4, 132.9, 132.8, 132.6, 132.3, 131.4, 130.5, 130.0, 128.8, 128.7, 128.7, 128.5, 128.0, 127.7, 127.1, 126.8, 126.6, 126.4, 104.7, 92.8, 92.4, 90.1, 78.4, 75.3, 71.1, 62.4, 50.1, 48.3, 47.0, 30.6, 29.7; **IR (ATR):**  $\tilde{\nu}$  3058, 2924, 2852, 1493, 1446, 1026, 891, 762, 703, 429, 396  $\text{cm}^{-1}$ ; **HRMS (ESI)** calculated for  $[\text{M}-\text{Cl}]^+$  equals to  $[\text{C}_{46}\text{H}_{35}\text{Ru}]^+$  689.1777, found: 689.1756;  **$R_f$** : 0.30 (pentane/EtOAc 1:1)  **$[\alpha]_D^{20}$** : + 152.6 ( $c$  = 0.1,  $\text{CH}_2\text{Cl}_2$ ).

Crystals suitable for X-Ray analysis were grown by slow evaporation from THF under inert atmosphere.

X-Ray structure: CCDC 1499171

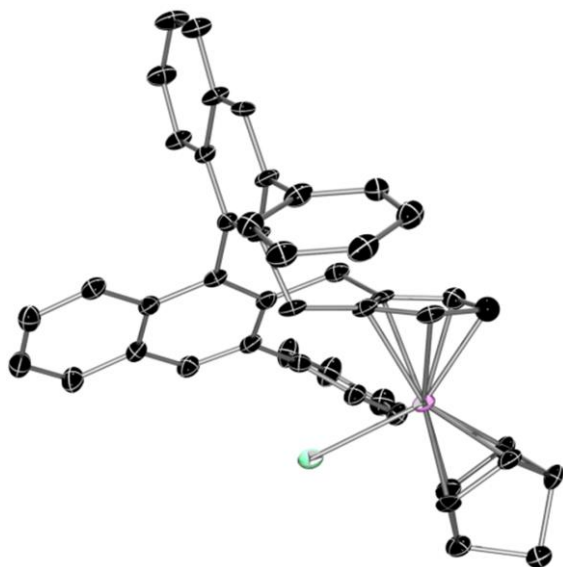

Complex [Cp<sup>X</sup>(Ph)Ru(CO)(MeCN)<sub>2</sub>]PF<sub>6</sub> (**1a-CO**):

**1a** (4.0 mg, 4.63 μmol, 1.0 equiv.) was weighted in an oven dried vial. The vial was stoppered, evacuated and backfilled with nitrogen. Degassed acetonitrile (200 μL) was added and carbon monoxide bubbled through the mixture for 1 min. The mixture was stirred at 23 °C for 60 min. The solvent was removed under reduced pressure yielding **1a-CO** in quantitative yield as bright yellow solid.

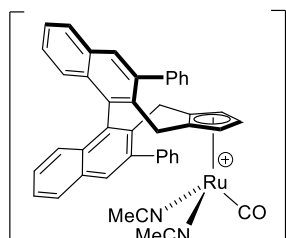

<sup>1</sup>H NMR (600 MHz, CD<sub>3</sub>CN) δ (ppm) = 8.02 – 8.01 (m, 1H), 8.01 – 7.99 (m, 2H), 7.96 – 7.95 (m, 1H), 7.62 – 7.59 (m, 2H), 7.56 – 7.44 (m, 8H), 7.42 – 7.38 (m, 2H), 7.35 – 7.30 (m, 2H), 7.05 – 7.00 (m, 2H), 4.73 – 4.69 (m, 1H), 4.38 – 4.35 (m, 1H), 4.16 (t, *J* = 2.4 Hz, 1H), 3.77 (d, *J* = 15.5 Hz, 1H), 3.36 (d, *J* = 14.2 Hz, 1H), 3.12 (d, *J* = 15.5 Hz, 1H), 2.99 (d, *J* = 14.2 Hz, 1H); <sup>13</sup>C NMR (151 MHz, CD<sub>3</sub>CN) δ (ppm) = 199.2, 142.1, 141.8, 141.6, 138.5, 137.1, 133.3, 132.5, 132.2, 131.1, 130.6, 130.4, 129.5, 129.2, 128.8, 128.6, 128.2, 127.7, 127.7, 127.6, 127.5, 127.2, 127.1, 100.9, 90.8, 90.3, 89.9, 64.9, 29.4, 28.6; <sup>31</sup>P NMR (162 MHz, CD<sub>3</sub>CN) δ (ppm) = -144.65 (hept, *J* = 706.2 Hz); IR (ATR):  $\tilde{\nu}$  1992, 1674, 1494, 1448, 838, 763, 705, 558 cm<sup>-1</sup>; HRMS (ESI) calculated for [M-MeCN-PF<sub>6</sub>]<sup>+</sup> equals to [C<sub>42</sub>H<sub>30</sub>NORu]<sup>+</sup> 666.1365, found: 666.1358; [α]<sub>D</sub><sup>20</sup>: + 5.6 (c = 0.3, CH<sub>3</sub>CN).

## Substrates: Alkynes

Alkynes **4a-4k** and **4m-4n** are either commercially available or literature known compounds and were prepared according to the procedures in the given references. All spectra were in good agreement with the reported data.

| Number    | Structure                                                                           | Reference                                                                     |
|-----------|-------------------------------------------------------------------------------------|-------------------------------------------------------------------------------|
| <b>4a</b> | 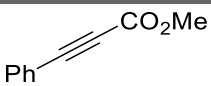   | Supplier: TCI<br>CAS number: 4891-38-7                                        |
| <b>4b</b> |    | <i>Nature Chemistry</i> , 2015, <b>7</b> , 171-177;<br>(SI page 34, 191-192)  |
| <b>4c</b> |    | <i>Chem. Commun.</i> , 2015, <b>51</b> , 13004-13007;<br>(SI page 6-7; 29-30) |
| <b>4d</b> |    | <i>Chem. Eur. J.</i> , 2015, <b>21</b> , 1468-1473;<br>(SI page 4, 15)        |
| <b>4e</b> |   | Supplier: Fluorochem<br>CAS number: 637-44-5                                  |
| <b>4f</b> |  | <i>J. Org. Chem.</i> , 2004, <b>69</b> , 1615-1619;<br>(SI page 3; 11-14)     |
| <b>4g</b> |  | <i>Org. Lett.</i> , 2001, <b>3</b> , 3111-3113;<br>(SI page 1; 11-14)         |
| <b>4h</b> |  | <i>Org. Lett.</i> , 2015, <b>17</b> , 520-523;<br>(SI page 13; 82-83)         |
| <b>4i</b> |  | <i>Org. Lett.</i> , 2015, <b>15</b> , 4742-4745;<br>(SI page 2; 33)           |
| <b>4j</b> |  | <i>J. Org. Chem.</i> , 1958, <b>23</b> , 885-890;                             |
| <b>4k</b> |  | <i>J. Org. Chem.</i> , 1987, <b>52</b> , 3662-3668;                           |



|           |                                                                                   |                                                                             |
|-----------|-----------------------------------------------------------------------------------|-----------------------------------------------------------------------------|
| <b>4m</b> | 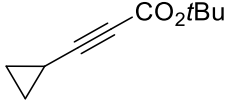 | <i>Chem. Commun.</i> , 2015, <b>51</b> , 13004-13007;<br>(SI page 9; 49-50) |
| <b>4n</b> |  | <i>Chem.-Eur. J.</i> , 2014, <b>20</b> , 1834-1838;<br>(SI page 7; 22)      |

**Methyl (*E*)-non-4-en-2-ynoate (**4l**):**

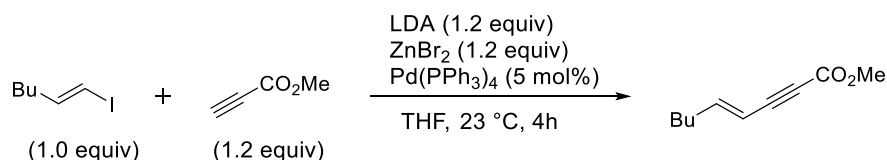

In a flame dried schlenk flask was diisopropylamine (285  $\mu$ L, 2.00 mmol, 1.2 equiv.) in dry THF (4.1 mL). *n*BuLi (2.5 M in hexane, 800  $\mu$ L, 2.00 mmol, 1.2 equiv.) was added dropwise at 0 °C under nitrogen atmosphere. After 30 min the solution was cooled down to -78 °C and methyl propiolate (179  $\mu$ L, 2.00 mmol, 1.2 equiv) in THF (0.8 mL) was added slowly. After 30 min at this temperature zinc bromide (450 mg, 2.00 mmol, 1.2 equiv) in THF (1.7 mL) was added and the mixture gradually warmed to 0 °C over a period of 30 min. (*E*)-1-iodohex-1-ene (350 mg, 1.67 mmol, 1.0 equiv) in THF (1.7 mL) was added followed by Pd(PPh<sub>3</sub>)<sub>4</sub> (96.0 mg, 83  $\mu$ mol, 5 mol%) under counter flow of nitrogen. The mixture was allowed to warm to 23 °C and stirred at this temperature for 4 h. Aq. Sat. NH<sub>4</sub>Cl solution was added and diluted with diethyl ether. The organic layer was washed with aq. sat. NaHCO<sub>3</sub> solution, dried over Na<sub>2</sub>SO<sub>4</sub> and the solvent was removed under reduced pressure. Purification by silica gel column chromatography (pentane/EtOAc 15:1) yielded **4l** (70.0 mg, 25% yield) as colorless oil.

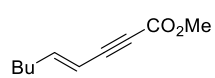 **<sup>1</sup>H NMR** (400 MHz, CDCl<sub>3</sub>)  $\delta$  (ppm) = 6.52 (dt, *J* = 15.7, 7.0 Hz, 1H), 5.56 (dt, *J* = 16.0, 1.6 Hz, 1H), 3.78 (s, 3H), 2.23 – 2.13 (m, 2H), 1.46 – 1.22 (m, 4H), 0.90 (t, *J* = 7.1 Hz, 3H); **<sup>13</sup>C NMR** (101 MHz, CDCl<sub>3</sub>)  $\delta$  (ppm) = 154.7, 152.9, 107.1, 86.2, 79.2, 52.8, 33.3, 30.4, 22.3, 13.9; **IR (ATR):**  $\tilde{\nu}$  2957, 2931, 2216, 1713, 1434, 1254, 1101, 962, 749 cm<sup>-1</sup>; **HRMS (ESI)** calculated for [C<sub>10</sub>H<sub>14</sub>O<sub>2</sub>+H]<sup>+</sup> : 167.1067, found: 167.1072; **R<sub>f</sub>**: 0.32 (pentane/Et<sub>2</sub>O 15:1).

## Substrates: Alkynes

All alkenes are either commercially available or literature known compounds and were prepared according to the procedures in the given references. All spectra were in good agreement with the reported data

| Number | Structure                                                                           | Reference                                                                |
|--------|-------------------------------------------------------------------------------------|--------------------------------------------------------------------------|
| 5a     |    | Supplier: Fluka<br>CAS number: 498-66-8                                  |
| 5b     |    | Supplier: Alfa Aesar<br>CAS number: 121-46-0                             |
| 5c     |    | <i>Organometallics</i> , 2008, <b>27</b> , 3622-3625;<br>(SI page 9-10)  |
| 5d     |   | <i>Organometallics</i> , 2008, <b>27</b> , 3622-3625;<br>(SI page 10-11) |
| 5e     |  | <i>Organometallics</i> , 2008, <b>27</b> , 3622-3625;<br>(SI page 6-7)   |
| 5f     |  | <i>Organometallics</i> , 2008, <b>27</b> , 3622-3625;<br>(SI page 5-6)   |
| 5g     |  | Supplier: TCI<br>CAS number: 573-57-9                                    |

**Additional Optimization table:**

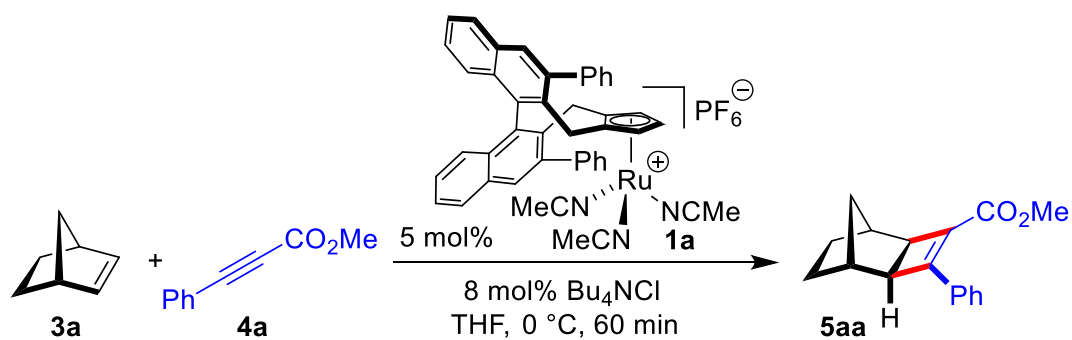

| entry | deviation from standard conditions                                    | conv. (%) <sup>b</sup> | <b>5aa</b> (%) <sup>b</sup> | er <sup>c</sup> |
|-------|-----------------------------------------------------------------------|------------------------|-----------------------------|-----------------|
| 1     | none                                                                  | 100                    | 98                          | 96.5:3.5        |
| 2     | no (Bu <sub>4</sub> N)Cl, 23 °C                                       | 100                    | 80                          | 47.5:52.5       |
| 3     | 6 mol % (Bu <sub>4</sub> N)Cl, 23 °C                                  | 100                    | 100                         | 94.5:5.5        |
| 4     | 20 mol % (Bu <sub>4</sub> N)Cl                                        | 100                    | 100                         | 96.5:3.5        |
| 5     | Acetone instead of THF                                                | 100                    | 87                          | 95.5:4.5        |
| 6     | THF + 1.0 equiv. H <sub>2</sub> O                                     | 100                    | 100                         | 96:4            |
| 7     | SbF <sub>6</sub> <sup>-</sup> instead of PF <sub>6</sub> <sup>-</sup> | 100                    | 92                          | 96:4            |
| 8     | -25 °C                                                                | 9                      | 3                           | 94:6            |
| 9     | 1 mol% <b>1a</b> , 2 mol % (Bu <sub>4</sub> N)Cl, 23°C, 24h           | 86                     | 79                          | 94.5:5.5        |

<sup>a</sup> Conditions: 37.5 μmol **3a**, 25 μmol **4a**, 2.0 μmol additive, 1.25 μmol **1a**, 0.3 M in THF, 0 °C, 60 min.  
<sup>b</sup> Determined by <sup>1</sup>H-NMR with an internal standard. <sup>c</sup> Determined by HPLC with a chiral stationary phase.

## Products:

### General procedure for the Ru-catalyzed synthesis of cyclobutenes:

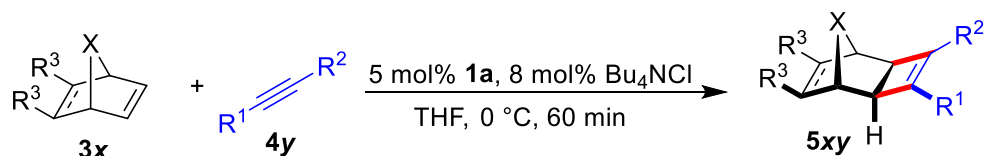

**1a** (4.33 mg, 5.00  $\mu$ mol, 5 mol%),  $\text{Bu}_4\text{NCl}$  (2.22 mg, 8.00  $\mu$ mol, 8 mol%) and alkene **3** (150  $\mu$ mol, 1.5 equiv.) were weighed in an oven dried tube containing a magnetic stirring bar. The tube was sealed with a rubber septum, evacuated and backfilled with nitrogen. At 23 °C dry THF (133  $\mu$ L) was added and the mixture was stirred for two minutes. The color changed from brown to deep red. After cooling down to 0 °C alkyne **4** (100  $\mu$ mol, 1.0 equiv.) in THF (200  $\mu$ L, reaching 0.3 M) was added *via* syringe. After completion of the reaction the mixture was purified directly by silica gel chromatography eluting with pentane/ $\text{Et}_2\text{O}$  20:1 to afford the cyclobutene product **5**.

Optional, to recover the catalyst, after full conversion norbornadiene (20.3  $\mu$ L, 200  $\mu$ mol, 2.0 equiv.) was added and the solution stirred for 20 min at 23 °C. To prevent precipitation of the catalyst, some DCM is added to the reaction mixture when loading onto the column. Eluting with pentane/ $\text{EtOAc}$  1:1 delivered complex **12**. This compound can be further purified by eluting through a pad of neutral allox with DCM.

### Procedure for the big scale synthesis of cyclobutene **5dc**:

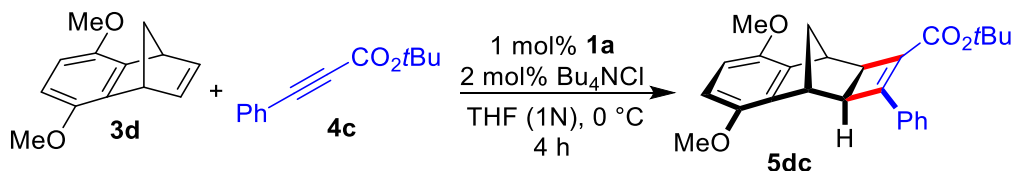

**1a** (21.7 mg, 25.00  $\mu$ mol, 1 mol%),  $\text{Bu}_4\text{NCl}$  (13.9 mg, 50.0  $\mu$ mol, 2 mol%) and alkene **3d** (107 mg, 0.5 mmol, 0.2 equiv.) were weighed in an oven dried tube containing a magnetic stirring bar. The tube was sealed with a rubber septum, evacuated and backfilled with nitrogen. At 23 °C dry THF (0.5 mL) was added and the mixture was stirred for two minutes. The color changed from brown to deep red. After cooling down to 0° a solution of alkene **3d** (500 mg, 2.0 mmol, 1.0 equiv.) and alkyne **4c** (506 mg, 2.0 mmol, 1.0 equiv.) in THF (2.0 mL) were added. After completion of the reaction the mixture was purified directly by silica gel chromatography eluting with pentane/ $\text{Et}_2\text{O}$  20:1 to afford the cyclobutene product **5dc**.

(-)-Methyl (1*S*,5*S*,6*R*)-4-phenyltricyclo[4.2.1.0<sup>2,5</sup>]non-3-ene-3-carboxylate (**5aa**):

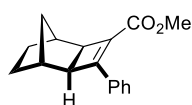

Obtained as colorless oil in 97% yield (25.3 mg). **<sup>1</sup>H NMR** (400 MHz, CDCl<sub>3</sub>)  $\delta$  (ppm) = 8.08 – 7.98 (m, 2H), 7.46 – 7.32 (m, 3H), 3.79 (s, 3H), 2.81 (d,  $J$  = 3.7 Hz, 1H), 2.70 (d,  $J$  = 3.7 Hz, 1H), 2.34 – 2.16 (m, 2H), 1.71 – 1.59 (m, 2H), 1.44 – 1.33 (m, 1H), 1.26 – 1.15 (m, 2H), 1.09 – 0.99 (m, 1H); **<sup>13</sup>C NMR** (101 MHz, CDCl<sub>3</sub>)  $\delta$  (ppm) = 163.6, 156.2, 132.8, 130.0, 129.0, 128.5, 128.4, 51.3, 46.8, 46.1, 34.9, 34.4, 30.7, 28.5, 28.5; **IR (ATR):**  $\tilde{\nu}$  2950, 2870, 1707, 1220, 1204, 1132, 770 cm<sup>-1</sup>; **HRMS (ESI)** calculated for [C<sub>17</sub>H<sub>18</sub>O<sub>2</sub>+H]<sup>+</sup>: 255.1380, found: 255.1385; **R<sub>f</sub>**: 0.70 (pentane/EtOAc 6:1); **[ $\alpha$ ]<sub>D</sub><sup>20</sup>**: - 24.2° (c = 1.0, CHCl<sub>3</sub>) ; **m.p.**: 64 °C.

Chiral HPLC: Chiralpak IA, 4.6 x 250 mm; 1% *i*-PrOH / hexane, 1.0 mL/min, 234 nm;  $t_R$  (major) = 5.6 min,  $t_R$  (minor) = 8.4 min, 96.5:3.5 er.

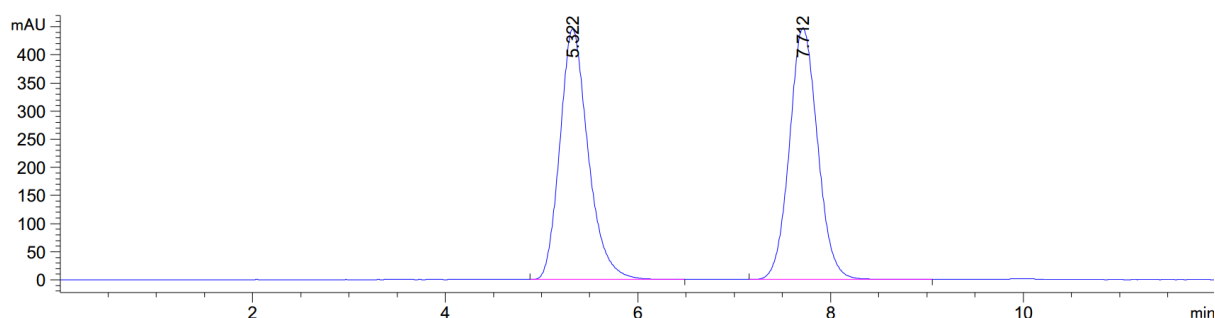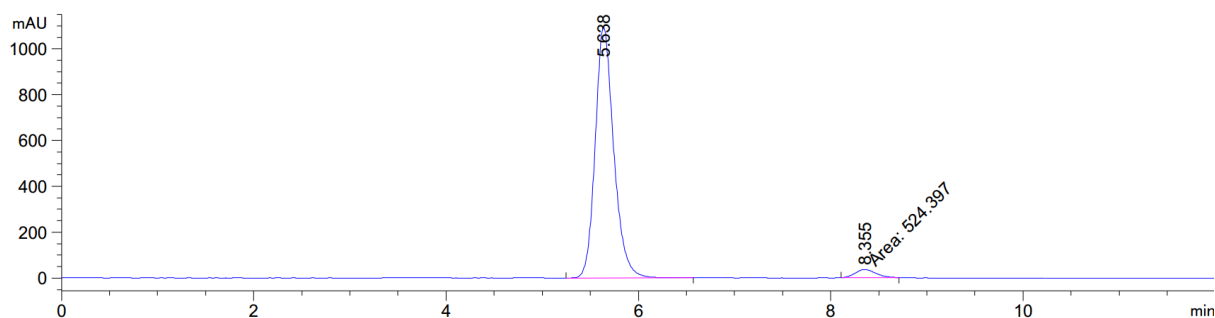

(-)-Isopropyl (1*S*,5*S*,6*R*)-4-phenyltricyclo[4.2.1.0<sup>2,5</sup>]non-3-ene-3-carboxylate (**5ab**):

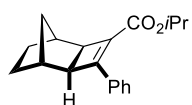

Obtained as colorless oil in 86% yield (24.2 mg). **<sup>1</sup>H NMR** (400 MHz, CDCl<sub>3</sub>)

δ (ppm) = 8.10 – 7.98 (m, 2H), 7.43 – 7.30 (m, 3H), 5.11 (hept, *J* = 6.3 Hz, 1H), 2.79 (d, *J* = 3.7 Hz, 1H), 2.69 (d, *J* = 3.6 Hz, 1H), 2.30 – 2.25 (m, 1H),

2.25 – 2.21 (m, 1H), 1.70 – 1.61 (m, 2H), 1.43 – 1.36 (m, 1H), 1.32 (d, *J* = 6.2 Hz, 3H), 1.31 (d, *J* = 6.3 Hz, 3H), 1.25 – 1.18 (m, 2H), 1.07 – 1.00 (m, 1H); **<sup>13</sup>C NMR** (101 MHz, CDCl<sub>3</sub>) δ (ppm) = 162.8, 155.3, 132.9, 129.8, 129.4, 129.0, 128.4, 67.4, 46.6, 46.2, 34.9, 34.4, 30.7, 28.5, 28.5, 22.1; **IR (ATR):**  $\tilde{\nu}$  2952, 2870, 1698, 1614, 1219, 1203, 1103, 770, 692 cm<sup>-1</sup>; **HRMS**

**(ESI)** calculated for [C<sub>19</sub>H<sub>22</sub>O<sub>2</sub>+H]<sup>+</sup> : 283.1693, found: 283.1691; **R<sub>f</sub>**: 0.90 (pentane/EtOAc 5:1); **[α]<sub>D</sub><sup>20</sup>**: - 19.8° (c = 1.0, CHCl<sub>3</sub>).

Chiral HPLC: Chiralpak IA, 4.6 x 250 mm; 1% *i*-PrOH / hexane, 1.0 mL/min, 290 nm; *t<sub>R</sub>* (major) = 4.8 min, *t<sub>R</sub>* (minor) = 6.2 min, 98:2 er.

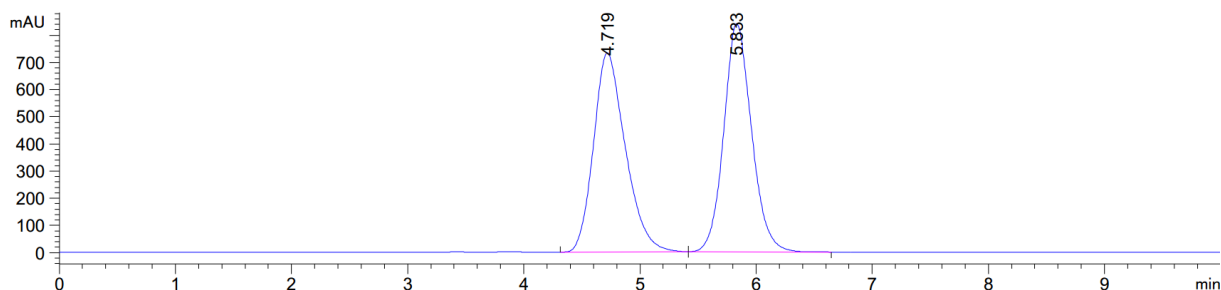

| Peak # | RetTime [min] | Type | Width [min] | Area [mAU*s] | Height [mAU] | Area %  |
|--------|---------------|------|-------------|--------------|--------------|---------|
| 1      | 4.719         | BB   | 0.2837      | 1.39336e4    | 733.19507    | 49.9696 |
| 2      | 5.833         | BB   | 0.2519      | 1.39506e4    | 839.47131    | 50.0304 |

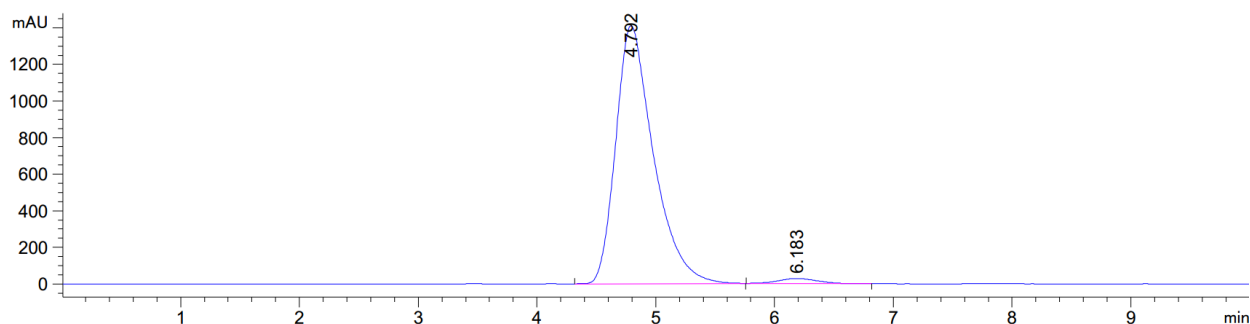

| Peak # | RetTime [min] | Type | Width [min] | Area [mAU*s] | Height [mAU] | Area %  |
|--------|---------------|------|-------------|--------------|--------------|---------|
| 1      | 4.792         | BB   | 0.3253      | 3.10645e4    | 1408.65967   | 98.0848 |
| 2      | 6.183         | BB   | 0.3157      | 606.55957    | 27.46069     | 1.9152  |

(-)-tert-butyl (1*S*,5*S*,6*R*)-4-phenyltricyclo[4.2.1.0<sup>2,5</sup>]non-3-ene-3-carboxylate (**5ac**):

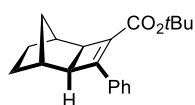

Obtained as colorless oil in 80% yield (23.6 mg). **<sup>1</sup>H NMR** (400 MHz, CDCl<sub>3</sub>) δ (ppm) = 8.05 – 7.96 (m, 2H), 7.43 – 7.30 (m, 3H), 2.75 (d, *J* = 3.5 Hz, 1H), 2.65 (d, *J* = 3.4 Hz, 1H), 2.26 (dt, *J* = 2.9, 1.5 Hz, 1H), 2.23 (dt, *J* = 2.9, 1.5 Hz, 1H), 1.71 – 1.57 (m, 2H), 1.54 (s, 9H), 1.43 – 1.36 (m, 1H), 1.25 – 1.15 (m, 2H), 1.06 – 0.99 (m, 1H); **<sup>13</sup>C NMR** (101 MHz, CDCl<sub>3</sub>) δ (ppm) = 162.8, 154.3, 133.0, 130.7, 129.7, 128.9, 128.3, 80.4, 46.5, 46.4, 34.9, 34.4, 30.7, 28.6, 28.5, 28.5; **IR (ATR):**  $\tilde{\nu}$  2953, 2870, 1697, 1367, 1227, 1172, 1161, 1134, 770, 692 cm<sup>-1</sup>; **HRMS (APCI)** calculated for [C<sub>20</sub>H<sub>24</sub>O<sub>2</sub>]<sup>+</sup>: 296.1771, found: 296.1776; **R<sub>f</sub>**: 0.90 (pentane/EtOAc 5:1); **m.p.**: 40-41 °C; **[α]<sub>D</sub><sup>20</sup>**: - 17.7° (c = 1.0, CHCl<sub>3</sub>, 98:2 er).

The enantiomeric excess was determined after reduction to the corresponding alcohol:

(-)-((1*S*,5*S*,6*R*)-4-phenyltricyclo[4.2.1.0<sup>2,5</sup>]non-3-en-3-yl)methanol (**5ac-OH**):

To a solution of **5ac** (10.5 mg, 35 μmol, 1.0 equiv.) in toluene was added DIBAL-H (1.2 M in toluene, 62 μL, 74 μmol, 2.1 equiv.) at -78 °C under nitrogen atmosphere. The solution was stirred at this temperature for 30 min and then gradually warmed to 0°C. Water, aq. sat. rochelle salt solution and ethyl acetate were added. The layers were separated, the aqueous layer was extracted with ethyl acetate (3x), combined organic layers were dried over MgSO<sub>4</sub> and the solvent was removed under reduced pressure. Purification by column chromatography over silica gel delivered allylic alcohol **5ac-OH** (6.8 mg, 30 μmol, 85% yield).

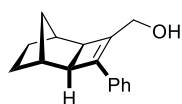

**<sup>1</sup>H NMR** (400 MHz, CDCl<sub>3</sub>) δ (ppm) = 7.37 – 7.30 (m, 4H), 7.25 – 7.18 (m, 1H), 4.47 (d, *J* = 14.0 Hz, 1H), 4.40 (d, *J* = 14.0 Hz, 1H), 2.77 – 2.69 (m, 1H), 2.59 (d, *J* = 3.6 Hz, 1H), 2.20 (dt, *J* = 3.1, 1.5 Hz, 1H), 2.14 (dt, *J* = 3.0, 1.5 Hz, 1H), 1.62 (dt, *J* = 6.4, 2.0 Hz, 2H), 1.44 (dt, *J* = 10.2, 2.1 Hz, 1H), 1.39 (s, 1H), 1.23 – 1.08 (m, 2H), 1.02 (dt, *J* = 10.2, 1.4 Hz, 1H); **<sup>13</sup>C NMR** (101 MHz, CDCl<sub>3</sub>) δ (ppm) = 140.8, 140.3, 134.6, 128.6, 127.4, 126.7, 59.2, 46.7, 46.5, 34.7, 34.4, 30.8, 28.7, 28.4; **IR (ATR):**  $\tilde{\nu}$  2948, 2921, 2868, 1492, 1446, 1297, 1034, 990, 769, 692 cm<sup>-1</sup>; **HRMS (APCI)** calculated for [C<sub>16</sub>H<sub>18</sub>O]<sup>+</sup>: 226.1352, found: 226.1345; **R<sub>f</sub>**: 0.30 (pentane/EtOAc 6:1); **[α]<sub>D</sub><sup>20</sup>**: - 23.3° (c = 0.35, CHCl<sub>3</sub>).  
Chiral HPLC: Chiralpak OJH, 4.6 x 250 mm; 10% *i*-PrOH / hexane, 1.0 mL/min, 264 nm; **t<sub>R</sub>** (major) = 6.3 min, **t<sub>R</sub>** (minor) = 8.8 min, 98:2 er.

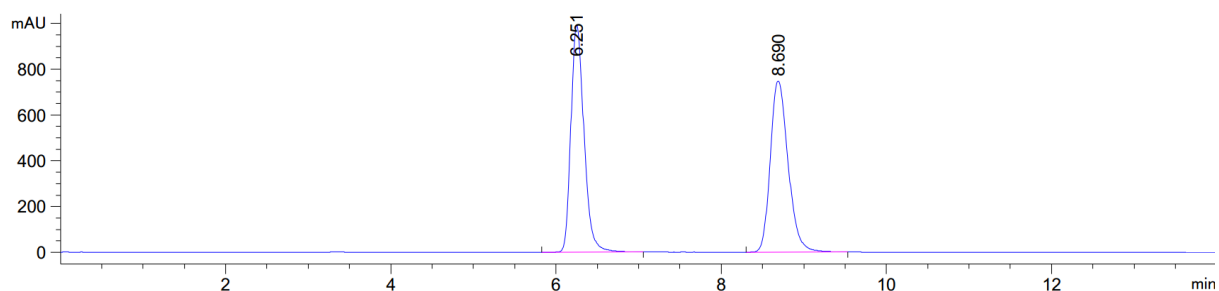

| Peak # | RetTime [min] | Type | Width [min] | Area [mAU*s] | Height [mAU] | Area %  |
|--------|---------------|------|-------------|--------------|--------------|---------|
| 1      | 6.251         | BB   | 0.1708      | 1.09666e4    | 993.62115    | 49.5010 |
| 2      | 8.690         | BB   | 0.2330      | 1.11877e4    | 745.92792    | 50.4990 |

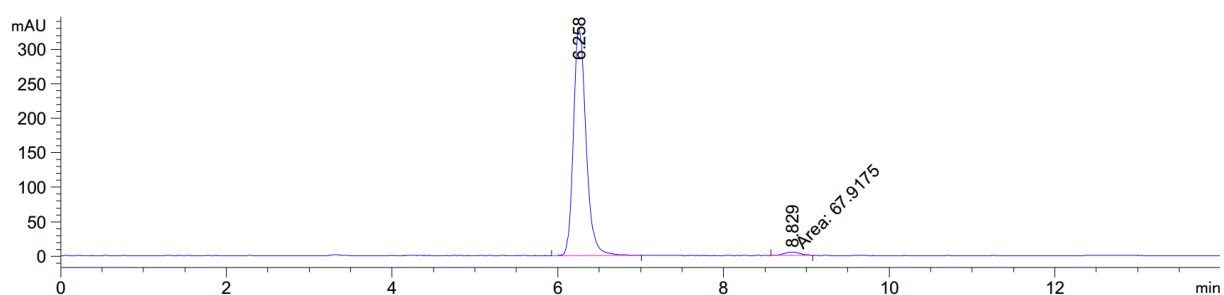

| Peak # | RetTime [min] | Type | Width [min] | Area [mAU*s] | Height [mAU] | Area %  |
|--------|---------------|------|-------------|--------------|--------------|---------|
| 1      | 6.258         | BB   | 0.1613      | 3489.35034   | 330.28983    | 98.0907 |
| 2      | 8.829         | MM   | 0.2258      | 67.91749     | 5.01325      | 1.9093  |



**(-)-Phenyl (1*S*,5*S*,6*R*)-4-phenyltricyclo[4.2.1.0<sup>2,5</sup>]non-3-ene-3-carboxylate (**5ad**):**

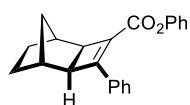

Obtained as colorless oil in 76% yield (24.1 mg). **<sup>1</sup>H NMR** (400 MHz, CDCl<sub>3</sub>)  $\delta$  (ppm) = 8.12 – 8.03 (m, 2H), 7.46 – 7.34 (m, 5H), 7.25 – 7.21 (m, 1H), 7.21 – 7.13 (m, 2H), 2.91 (d,  $J$  = 3.7 Hz, 1H), 2.87 (d,  $J$  = 3.8 Hz, 1H), 2.44 – 2.39 (m, 1H), 2.34 – 2.28 (m, 1H), 1.75 – 1.63 (m, 2H), 1.53 – 1.46 (m, 1H), 1.34 – 1.18 (m, 2H), 1.15 – 1.09 (m, 1H); **<sup>13</sup>C NMR** (101 MHz, CDCl<sub>3</sub>)  $\delta$  (ppm) = 161.3, 158.9, 150.8, 132.6, 130.4, 129.5, 129.3, 128.5, 127.6, 125.8, 121.9, 47.1, 46.3, 35.1, 34.5, 30.8, 28.5; **IR (ATR):**  $\tilde{\nu}$  2952, 1720, 1489, 1191, 1163, 1122, 689 cm<sup>-1</sup>; **HRMS (ESI)** calculated for [C<sub>22</sub>H<sub>20</sub>O<sub>2</sub>+H]<sup>+</sup>: 317.1536, found: 317.1563; **R<sub>f</sub>**: 0.50 (pentane/Et<sub>2</sub>O 8:1); **m.p.**: 44-45 °C; **[ $\alpha$ ]<sub>D</sub><sup>20</sup>**: - 6.0° (c = 1.0, CHCl<sub>3</sub>). Chiral HPLC: Chiralpak IA, 4.6 x 250 mm; 1% *i*-PrOH / hexane, 1.0 mL/min, 296 nm;  $t_R$  (major) = 7.6 min,  $t_R$  (minor) = 15.5 min, 97:3 er.

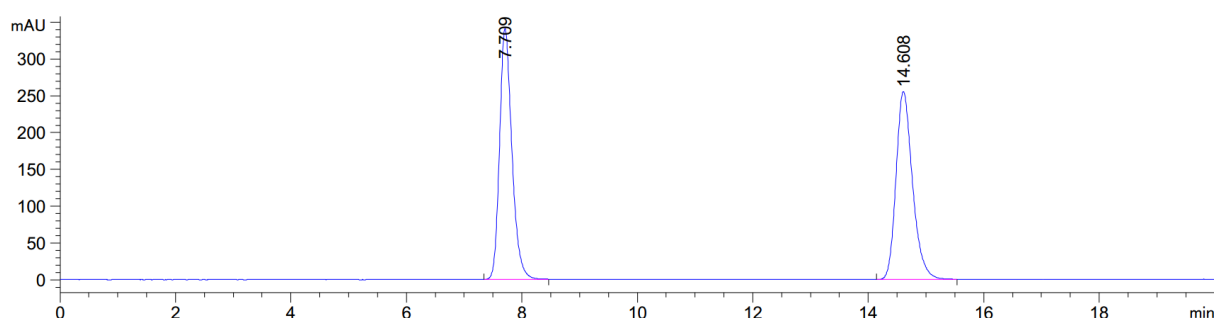

| Peak # | RetTime [min] | Type | Width [min] | Area [mAU*s] | Height [mAU] | Area %  |
|--------|---------------|------|-------------|--------------|--------------|---------|
| 1      | 7.709         | BB   | 0.2246      | 5038.44727   | 340.47116    | 49.8953 |
| 2      | 14.608        | BB   | 0.3034      | 5059.59668   | 255.08295    | 50.1047 |

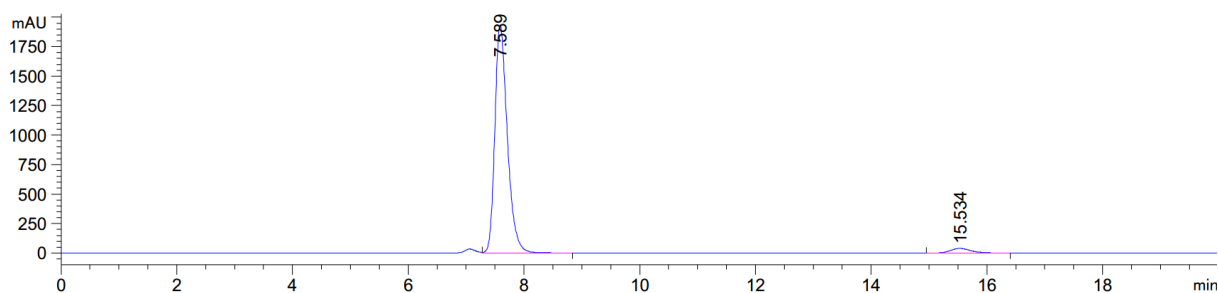

| Peak # | RetTime [min] | Type | Width [min] | Area [mAU*s] | Height [mAU] | Area %  |
|--------|---------------|------|-------------|--------------|--------------|---------|
| 1      | 7.589         | VB   | 0.2264      | 2.89055e4    | 1933.49231   | 96.7558 |
| 2      | 15.534        | BB   | 0.3596      | 969.20050    | 39.32123     | 3.2442  |

(-)-(1*S*,5*S*,6*R*)-4-phenyltricyclo[4.2.1.0<sup>2,5</sup>]non-3-ene-3-carboxylic acid (**5ae**):

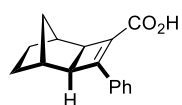

Obtained as white solid in 89% yield (21.5 mg). **<sup>1</sup>H NMR** (400 MHz, CDCl<sub>3</sub>) δ (ppm) = 12.17 (bs, 1H), 8.10 – 8.01 (m, 2H), 7.46 – 7.35 (m, 3H), 2.85 (d, *J* = 3.7 Hz, 1H), 2.76 (d, *J* = 3.6 Hz, 1H), 2.42 – 2.31 (m, 1H), 2.30 – 2.24 (m, 1H), 1.74 – 1.59 (m, 2H), 1.47 – 1.38 (m, 1H), 1.31 – 1.16 (m, 2H), 1.13 – 1.04 (m, 1H); **<sup>13</sup>C NMR** (101 MHz, CDCl<sub>3</sub>) δ (ppm) = 167.6, 158.8, 132.6, 130.4, 129.3, 128.5, 127.7, 47.0, 46.0, 35.0, 34.3, 30.8, 28.5, 28.5; **IR (ATR):**  $\tilde{\nu}$  953, 2870, 1670, 1609, 1492, 1234, 771, 690 cm<sup>-1</sup>; **HRMS (ESI)** calculated for [C<sub>16</sub>H<sub>16</sub>O<sub>2</sub>-H]<sup>-</sup>: 239.1078, found: 239.1072; **R<sub>f</sub>**: 0.90 (pentane/EtOAc 1:1 + 1% AcOH); **m.p.**: 149 °C; **[α]<sub>D</sub><sup>20</sup>**: - 40.4° (*c* = 1.0, CHCl<sub>3</sub>, 94:6 er).

The enantiomeric excess was determined after conversion to the corresponding methylester:

To a solution of **5ae** (2.6 mg, 11 μmol, 1.0 equiv.) in a mixture of toluene (32 μL) and methanol (22 μL) was added TMS-diazomethane (2 M in Et<sub>2</sub>O, 22.6 μL, 43 μmol, 4.0 equiv.) at 23 °C under nitrogen atmosphere. The solution was stirred at this temperature for 30 min and then all volatiles were removed under reduced pressure. Purification by column chromatography over silica gel delivered methyl ester **5aa** in quantitative yield. (Characterization see page 14). Chiral HPLC: Chiralpak IA, 4.6 x 250 mm; 1% *i*-PrOH / hexane, 1.0 mL/min, 234 nm; *t<sub>R</sub>* (major) = 5.3 min, *t<sub>R</sub>* (minor) = 7.4 min, 94:6 er.

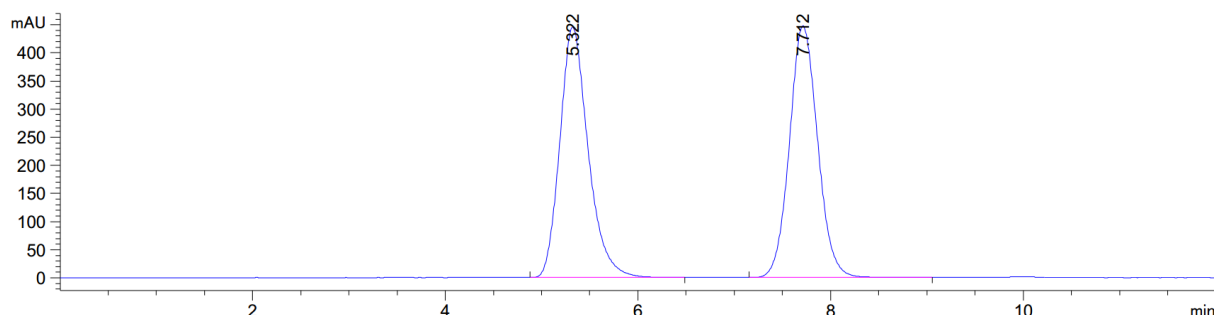

| Peak # | RetTime [min] | Type | Width [min] | Area [mAU*s] | Height [mAU] | Area %  |
|--------|---------------|------|-------------|--------------|--------------|---------|
| 1      | 5.322         | BB   | 0.3084      | 9094.88770   | 445.13443    | 49.9828 |
| 2      | 7.712         | BB   | 0.3153      | 9101.16016   | 447.39795    | 50.0172 |

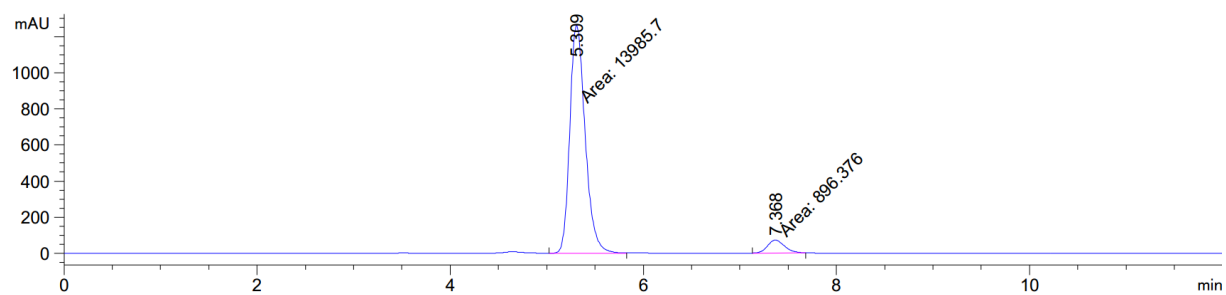

| Peak # | RetTime [min] | Type | Width [min] | Area [mAU*s] | Height [mAU] | Area %  |
|--------|---------------|------|-------------|--------------|--------------|---------|
| 1      | 5.309         | MM   | 0.1842      | 1.39857e4    | 1265.47058   | 93.9768 |
| 2      | 7.368         | MM   | 0.2059      | 896.37610    | 72.56498     | 6.0232  |

**(-)-Phenyl((1*S*,5*S*,6*R*)-4-phenyltricyclo[4.2.1.0<sup>2,5</sup>]non-3-en-3-yl)methanone (**5af**):**

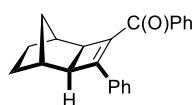

Obtained as colorless oil in 98% yield (30.0 mg). **<sup>1</sup>H NMR** (400 MHz, CDCl<sub>3</sub>)  $\delta$  (ppm) = 7.91 – 7.84 (m, 2H), 7.64 – 7.56 (m, 2H), 7.51 – 7.44 (m, 1H), 7.37 (dd,  $J$  = 8.3, 7.0 Hz, 2H), 7.31 – 7.21 (m, 3H), 2.97 – 2.92 (m, 2H), 2.29 – 2.23 (m, 1H), 2.23 – 2.17 (m, 1H), 1.69 – 1.56 (m, 2H), 1.50 (dt,  $J$  = 10.5, 2.1 Hz, 1H), 1.30 – 1.15 (m, 2H), 1.05 (dt,  $J$  = 10.5, 1.5 Hz, 1H); **<sup>13</sup>C NMR** (101 MHz, CDCl<sub>3</sub>)  $\delta$  (ppm) = 191.2, 154.3, 138.3, 136.5, 133.0, 132.5, 129.8, 129.0, 128.9, 128.5, 128.3, 48.2, 47.4, 35.4, 35.0, 31.0, 28.6, 28.5; **IR (ATR):**  $\tilde{\nu}$  2951, 2869, 1636, 1597, 1579, 1558, 1489, 1447, 1228, 899, 734, 692 cm<sup>-1</sup>; **HRMS (APCI)** calculated for [C<sub>22</sub>H<sub>20</sub>O]<sup>+</sup> : 300.1509, found: 300.1514; **R<sub>f</sub>**: 0.50 (pentane/Et<sub>2</sub>O 10:1); **[ $\alpha$ ]<sub>D</sub><sup>20</sup>**: - 12.0° ( $c$  = 1.0, CHCl<sub>3</sub>).

Chiral HPLC: Chiralpak IC, 4.6 x 250 mm; 2% *i*-PrOH / hexane, 1.0 mL/min, 288 nm;  $t_R$  (major) = 9.8 min,  $t_R$  (minor) = 12.9 min, 75.5:24.5 er.

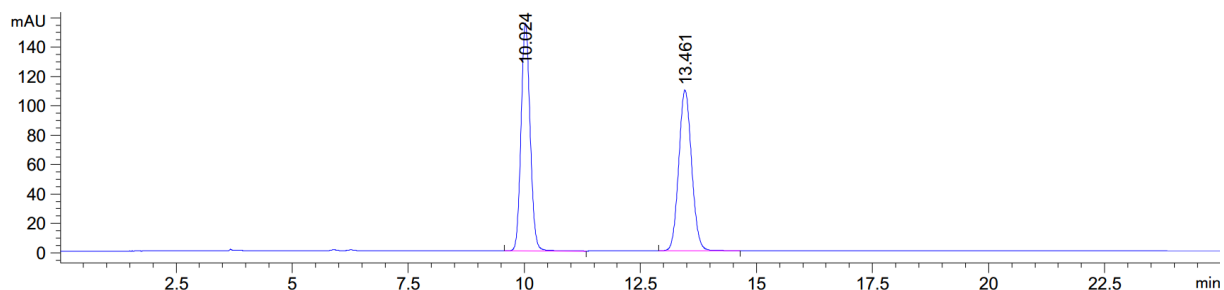

| Peak # | RetTime [min] | Type | Width [min] | Area [mAU*s] | Height [mAU] | Area %  |
|--------|---------------|------|-------------|--------------|--------------|---------|
| 1      | 10.024        | BB   | 0.2126      | 2106.53027   | 154.92740    | 50.0325 |
| 2      | 13.461        | BB   | 0.3006      | 2103.79419   | 109.28017    | 49.9675 |

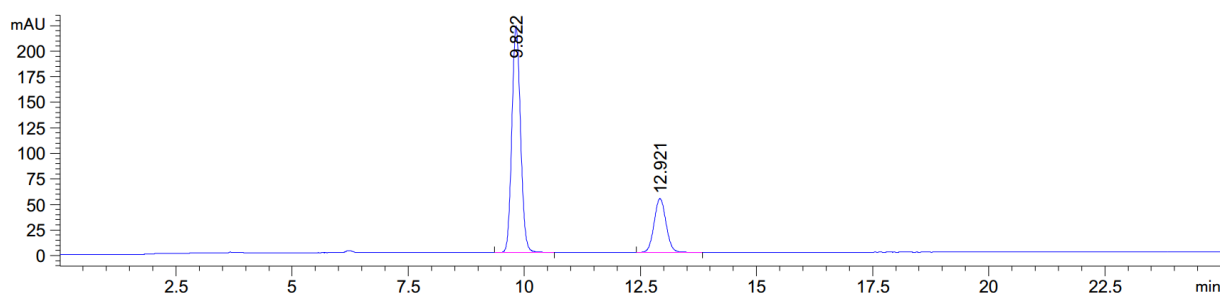

| Peak # | RetTime [min] | Type | Width [min] | Area [mAU*s] | Height [mAU] | Area %  |
|--------|---------------|------|-------------|--------------|--------------|---------|
| 1      | 9.822         | BB   | 0.2013      | 2867.83740   | 221.13652    | 75.5503 |
| 2      | 12.921        | BB   | 0.2759      | 928.09247    | 52.58828     | 24.4497 |

**(-)-Methyl (1*S*,5*S*,6*R*)-4-(3-bromophenyl)tricyclo[4.2.1.0<sup>2,5</sup>]non-3-ene-3-carboxylate (**5ag**):**

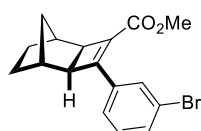

Obtained as colorless oil in 85% yield (28.4 mg). **<sup>1</sup>H NMR** (400 MHz, CDCl<sub>3</sub>)

δ (ppm) = 8.16 (t, *J* = 1.7 Hz, 1H), 7.99 (dt, *J* = 7.9, 1.3 Hz, 1H), 7.49 (ddd, *J* = 8.0, 2.0, 1.0 Hz, 1H), 7.31 – 7.21 (m, 1H), 3.80 (s, 3H), 2.79 (d, *J* = 3.7 Hz, 1H), 2.71 (d, *J* = 3.7 Hz, 1H), 2.30 – 2.26 (m, 1H), 2.26 – 2.21 (m, 1H), 1.70 – 1.62 (m, 2H), 1.36 (dt, *J* = 10.6, 2.0 Hz, 1H), 1.25 – 1.18 (m, 2H), 1.11 – 1.03 (m, 1H); **<sup>13</sup>C NMR** (101 MHz, CDCl<sub>3</sub>) δ (ppm) = 163.3, 154.3, 134.6, 132.8, 131.7, 130.0, 127.5, 122.6, 51.5, 46.8, 46.3, 34.8, 34.3, 30.7, 28.4, 28.4; **IR (ATR):**  $\tilde{\nu}$  2948, 2870, 1706, 1616, 1556, 1471, 1217, 1204, 1185, 1132, 1105, 780 cm<sup>-1</sup>; **HRMS (APCI)** calculated for [C<sub>17</sub>H<sub>17</sub>BrO<sub>2</sub>+H]<sup>+</sup> : 333.0485, found: 333.0487; **R<sub>f</sub>**: 0.65 (pentane/EtOAc 8:1); [ $\alpha$ ]<sub>D</sub><sup>20</sup>: - 14.1° (c = 1.0, CHCl<sub>3</sub>).

Chiral HPLC: Chiralpak AYH, 4.6 x 250 mm; 1% *i*-PrOH / hexane, 1.0 mL/min, 288 nm; *t<sub>R</sub>* (minor) = 6.0 min, *t<sub>R</sub>* (major) = 7.5 min, 97.5:2.5 er.

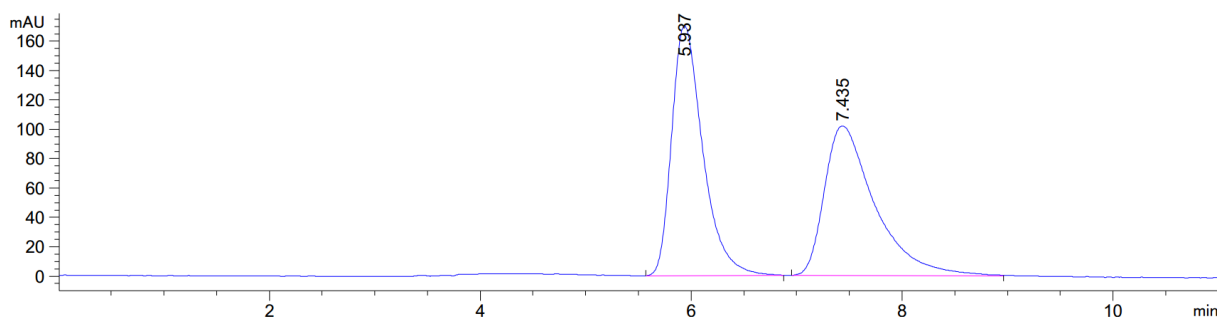

| Peak # | RetTime [min] | Type | Width [min] | Area [mAU*s] | Height [mAU] | Area %  |
|--------|---------------|------|-------------|--------------|--------------|---------|
| 1      | 5.937         | BB   | 0.3113      | 3488.84058   | 170.10147    | 50.7214 |
| 2      | 7.435         | BV   | 0.4829      | 3389.60059   | 101.69250    | 49.2786 |

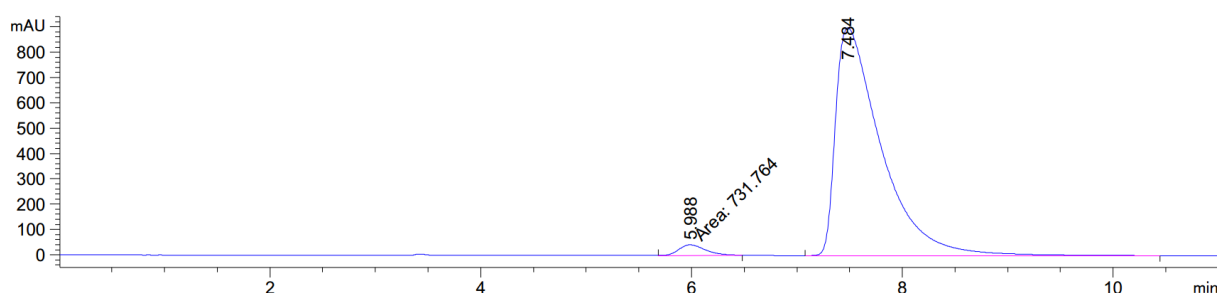

| Peak # | RetTime [min] | Type | Width [min] | Area [mAU*s] | Height [mAU] | Area %  |
|--------|---------------|------|-------------|--------------|--------------|---------|
| 1      | 5.988         | MM   | 0.2913      | 731.76373    | 41.86873     | 2.6294  |
| 2      | 7.484         | BV   | 0.4474      | 2.70978e4    | 899.71820    | 97.3706 |

The absolute configuration of **5ag** was determined by single crystal X-Ray analysis after saponification to the corresponding carboxylic acid:

To a solution of **5ag** (16.0 mg, 48  $\mu$ mol, 1.0 equiv.) in a THF (240  $\mu$ L) was added a 5% aq. LiOH solution (180  $\mu$ L) at 23 °C. The solution was stirred at 40 °C for 30 h and then diluted with ethyl acetate and acidified with 1 M HCl. The layers were separated, the aqueous layer was extracted with ethyl acetate (3x), combined organic layers were dried over MgSO<sub>4</sub> and the solvent was removed under reduced pressure. Purification by column chromatography over silica gel (pentane/EtOAc 8:1 + 1% AcOH) delivered acid **5ag-CO<sub>2</sub>H** (14.2 mg, 44  $\mu$ mol, 93% yield).

(-)-(1*S*,5*S*,6*R*)-4-(3-bromophenyl)tricyclo[4.2.1.0<sup>2,5</sup>]non-3-ene-3-carboxylic acid (**5ag-CO<sub>2</sub>H**):

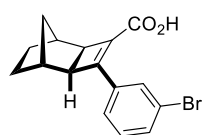

**<sup>1</sup>H NMR** (400 MHz, CDCl<sub>3</sub>)  $\delta$  (ppm) = 8.09 (t,  $J$  = 1.8 Hz, 1H), 8.02 (dt,  $J$  = 7.8, 1.3 Hz, 1H), 7.50 (ddd,  $J$  = 8.0, 2.0, 1.0 Hz, 1H), 7.31 – 7.24 (m, 1H), 2.82 (d,  $J$  = 3.7 Hz, 1H), 2.76 (d,  $J$  = 3.7 Hz, 1H), 2.37 – 2.31 (m, 1H), 2.28 – 2.23 (m, 1H), 1.73 – 1.57 (m, 2H), 1.42 – 1.34 (m, 1H), 1.27 – 1.20 (m, 2H), 1.12 – 1.06 (m, 1H); **<sup>13</sup>C NMR** (101 MHz, CDCl<sub>3</sub>)  $\delta$  (ppm) = 167.6, 156.9, 134.4, 133.2, 131.9, 130.1, 129.3, 127.9, 122.7, 47.0, 46.2, 34.9, 34.3, 30.7, 28.4, 28.4; **IR (ATR):**  $\tilde{\nu}$  2953, 2870, 1672, 1612, 1556, 1233, 785 cm<sup>-1</sup>; **HRMS (APCI)** calculated for [C<sub>16</sub>H<sub>15</sub>BrO<sub>2</sub>-H]<sup>-</sup> : 317.0183, found: 317.0190; **R<sub>f</sub>**: 0.50 (pentane/EtOAc 4:1 + 1% AcOH); **m.p.**: 113 °C; [ $\alpha$ ]<sub>D</sub><sup>20</sup>: - 25.3° (c = 1.0, CHCl<sub>3</sub>, 97.5:2.5 er).

X-Ray: CCDC 1499170

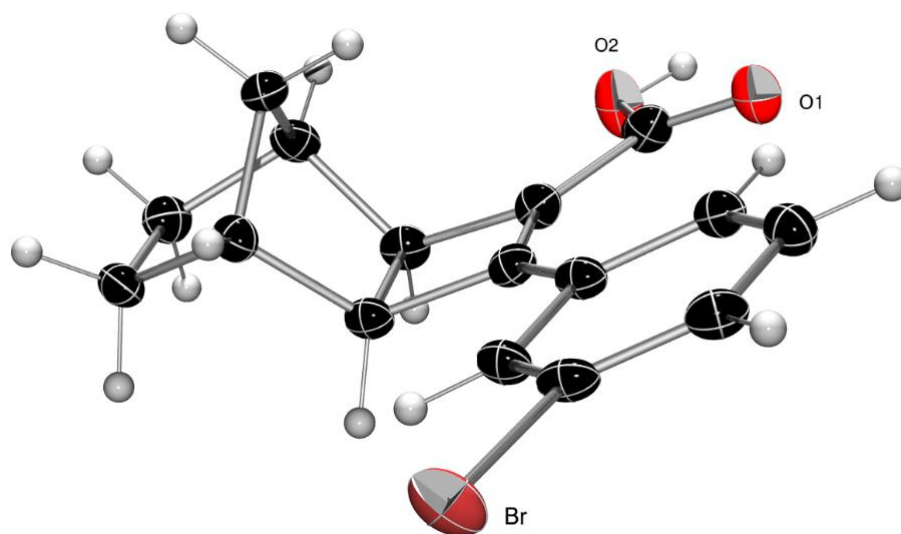

**(-)-Methyl (1*S*,5*S*,6*R*)-4-(4-nitrophenyl)tricyclo[4.2.1.0<sup>2,5</sup>]non-3-ene-3-carboxylate (**5ah**):**

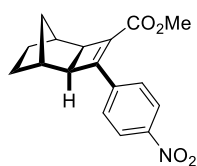

Obtained as yellow solid in 40% yield (12.1 mg). **<sup>1</sup>H NMR** (400 MHz, CDCl<sub>3</sub>)  $\delta$  (ppm) = 8.25 – 8.20 (m, 2H), 8.20 – 8.15 (m, 2H), 3.81 (s, 3H), 2.88 – 2.82 (m, 1H), 2.76 (d,  $J$  = 3.7 Hz, 1H), 2.30 (dt,  $J$  = 3.2, 1.4 Hz, 1H), 2.25 (dt,  $J$  = 3.0, 1.4 Hz, 1H), 1.73 – 1.63 (m, 2H), 1.38 – 1.30 (m, 1H), 1.28 – 1.19 (m, 2H), 1.13 – 1.05 (m, 1H); **<sup>13</sup>C NMR** (101 MHz, CDCl<sub>3</sub>)  $\delta$  (ppm) = 163.1, 153.1, 148.1, 138.3, 133.2, 129.7, 123.8, 51.7, 47.0, 46.8, 34.7, 34.3, 30.7, 28.4, 28.3; **IR (ATR):**  $\tilde{\nu}$  2952, 2871, 1708, 1518, 1347, 1223, 1206, 854 cm<sup>-1</sup>; **HRMS (APCI)** calculated for [C<sub>17</sub>H<sub>17</sub>NO<sub>4</sub>]<sup>+</sup> : 299.1152, found: 299.1157; **R<sub>f</sub>**: 0.70 (pentane/EtOAc 6:1); **m.p.**: 91 °C; **[ $\alpha$ ]<sub>D</sub><sup>20</sup>**: -53.3° (c = 0.3, CHCl<sub>3</sub>).

Chiral HPLC: Chiralpak IA, 4.6 x 250 mm; 1% *i*-PrOH / hexane, 1.0 mL/min, 320 nm;  $t_R$  (major) = 11.0 min,  $t_R$  (minor) = 15.1 min, 89.5:10.5 er.

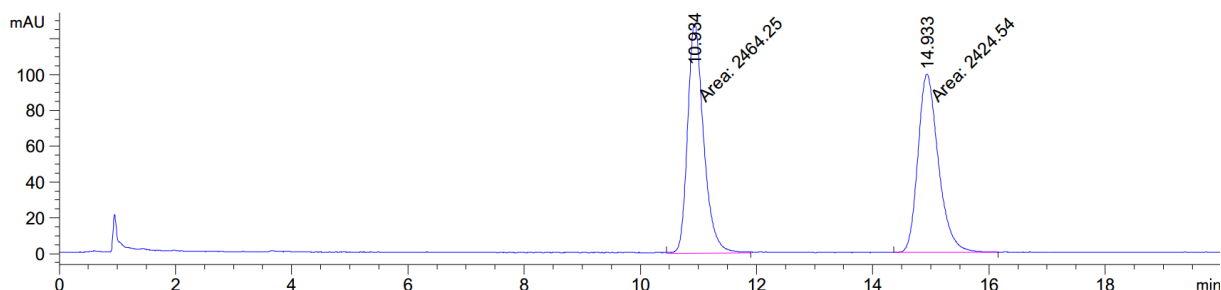

| Peak # | RetTime [min] | Type | Width [min] | Area [mAU*s] | Height [mAU] | Area %  |
|--------|---------------|------|-------------|--------------|--------------|---------|
| 1      | 10.934        | MM   | 0.3203      | 2464.25073   | 128.21194    | 50.4061 |
| 2      | 14.933        | MM   | 0.4062      | 2424.54346   | 99.47559     | 49.5939 |

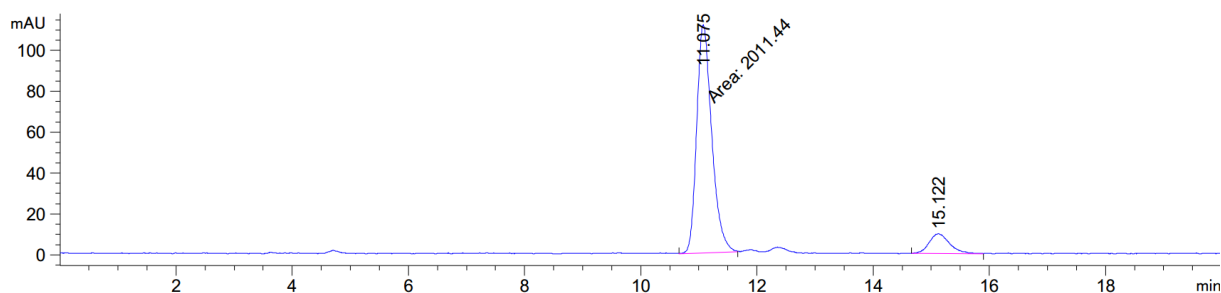

| Peak # | RetTime [min] | Type | Width [min] | Area [mAU*s] | Height [mAU] | Area %  |
|--------|---------------|------|-------------|--------------|--------------|---------|
| 1      | 11.075        | MM   | 0.3000      | 2011.44055   | 111.75826    | 89.5075 |
| 2      | 15.122        | BV   | 0.3589      | 235.79160    | 9.58869      | 10.4925 |

**(-)-Methyl (1*S*,5*S*,6*R*)-4-(4-methoxyphenyl)tricyclo[4.2.1.0<sup>2,5</sup>]non-3-ene-3-carboxylate (**5ai**):**

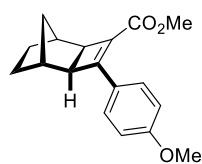

Obtained as yellow oil in 91% yield (26.0 mg). **<sup>1</sup>H NMR** (400 MHz, CDCl<sub>3</sub>) δ (ppm) = 8.02 (d, *J* = 8.4 Hz, 2H), 6.90 (d, *J* = 8.4 Hz, 2H), 3.83 (s, 3H), 3.77 (s, 3H), 2.76 (d, *J* = 3.6 Hz, 1H), 2.67 (d, *J* = 3.6 Hz, 1H), 2.25 (s, 1H), 2.21 (s, 1H), 1.69 – 1.56 (m, 2H), 1.38 (d, *J* = 10.5 Hz, 1H), 1.23 – 1.15 (m, 2H), 1.02 (d, *J* = 10.4 Hz, 1H); **<sup>13</sup>C NMR** (101 MHz, CDCl<sub>3</sub>) δ (ppm) = 163.8, 161.0, 156.2, 130.9, 125.9, 125.6, 113.8, 55.4, 51.2, 46.7, 45.9, 35.0, 34.5, 30.8, 28.5; **IR (ATR):**  $\tilde{\nu}$  2952, 1702, 1604, 1508, 1255, 1220, 1204, 1175, 1133 cm<sup>-1</sup>; **HRMS (APCI)** calculated for [C<sub>18</sub>H<sub>20</sub>O<sub>3</sub>]<sup>+</sup> : 284.1407, found: 284.1409; **R<sub>f</sub>**: 0.70 (pentane/EtOAc 6:1); **[α]<sub>D</sub><sup>20</sup>**: - 40.3° (c = 1.0, CHCl<sub>3</sub>).  
Chiral HPLC: Chiralpak IA, 4.6 x 250 mm; 5% *i*-PrOH / hexane, 1.0 mL/min, 310 nm; *t<sub>R</sub>* (major) = 7.2 min, *t<sub>R</sub>* (minor) = 14.0 min, 98:2 er.

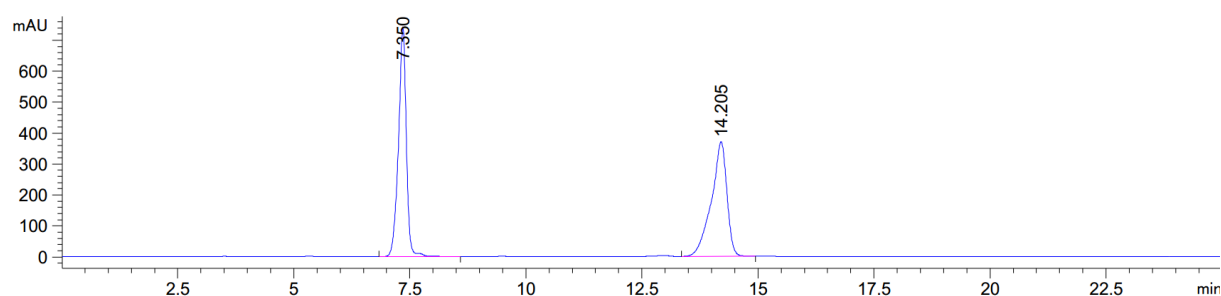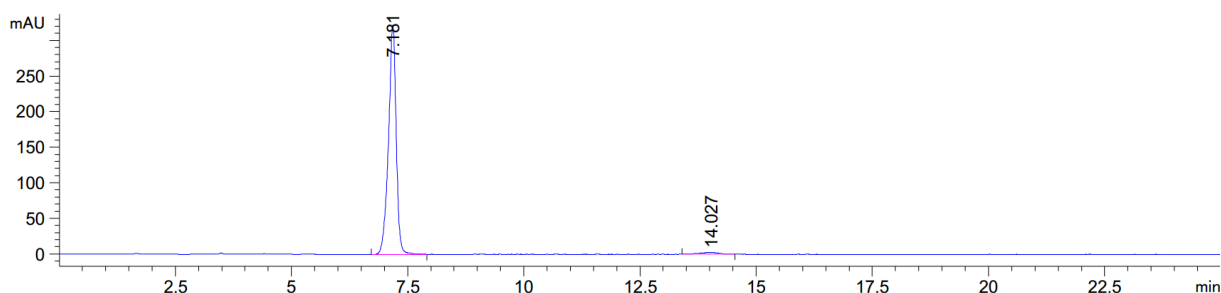

| Peak # | RetTime [min] | Type | Width [min] | Area [mAU*s] | Height [mAU] | Area %  |
|--------|---------------|------|-------------|--------------|--------------|---------|
| 1      | 7.350         | BB   | 0.1755      | 8726.60547   | 740.42865    | 50.3549 |
| 2      | 14.205        | BB   | 0.3333      | 8603.60938   | 369.92816    | 49.6451 |

  

| Peak # | RetTime [min] | Type | Width [min] | Area [mAU*s] | Height [mAU] | Area %  |
|--------|---------------|------|-------------|--------------|--------------|---------|
| 1      | 7.181         | BB   | 0.1712      | 3735.11304   | 322.28958    | 97.9553 |
| 2      | 14.027        | BB   | 0.3385      | 77.96602     | 2.87376      | 2.0447  |



**(-)-Methyl (1*S*,5*S*,6*R*)-4-(*m*-tolyl)tricyclo[4.2.1.0<sup>2,5</sup>]non-3-ene-3-carboxylate (**5aj**):**

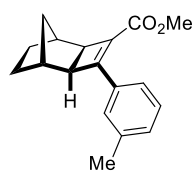

Obtained as yellow oil in 93% yield (25.0 mg). **<sup>1</sup>H NMR** (400 MHz, CDCl<sub>3</sub>) δ (ppm) = 7.89 – 7.81 (m, 2H), 7.28 (t, *J* = 7.5 Hz, 1H), 7.18 (d, *J* = 7.6 Hz, 1H), 3.78 (s, 3H), 2.79 (d, *J* = 3.6 Hz, 1H), 2.68 (d, *J* = 3.6 Hz, 1H), 2.38 (s, 3H), 2.25 (d, *J* = 8.0 Hz, 2H), 1.69 – 1.58 (m, 2H), 1.39 (d, *J* = 10.5 Hz, 1H), 1.24 – 1.17 (m, 2H), 1.03 (d, *J* = 10.4 Hz, 1H); **<sup>13</sup>C NMR** (101 MHz, CDCl<sub>3</sub>) δ (ppm) = 163.6, 156.4, 138.0, 132.7, 130.9, 129.5, 128.4, 128.2, 126.2, 51.3, 46.8, 46.1, 34.9, 34.4, 30.7, 28.5, 28.5, 21.6; **IR (ATR):**  $\tilde{\nu}$  2949, 2869, 1706, 1613, 1233, 1204, 1130, 780 cm<sup>-1</sup>; **HRMS (APCI)** calculated for [C<sub>18</sub>H<sub>20</sub>O<sub>2</sub>+H]<sup>+</sup> : 269.1536, found: 269.1529; **R<sub>f</sub>**: 0.70 (pentane/EtOAc 6:1); **[α]<sub>D</sub><sup>20</sup>**: - 24.0° (*c* = 1.0, CHCl<sub>3</sub>).

Chiral HPLC: Chiralpak IA, 4.6 x 250 mm; 1% *i*-PrOH / hexane, 1.0 mL/min, 292 nm; *t<sub>R</sub>* (major) = 4.8 min, *t<sub>R</sub>* (minor) = 6.1 min, 96.5:3.5 er.

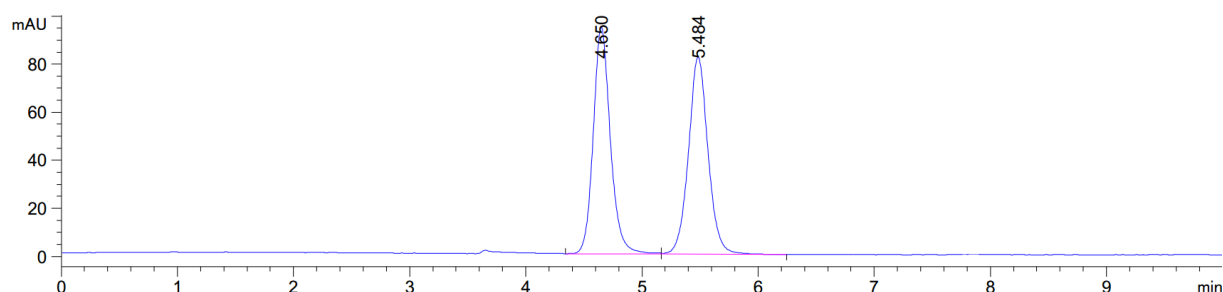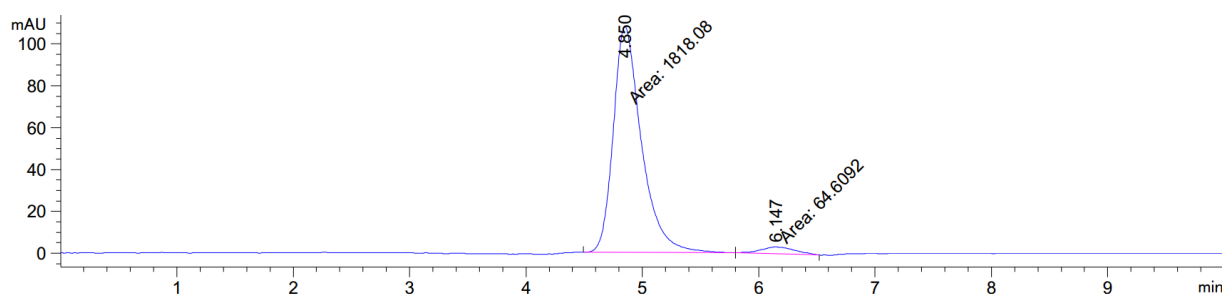

| Peak # | RetTime [min] | Type | Width [min] | Area [mAU*s] | Height [mAU] | Area %  |
|--------|---------------|------|-------------|--------------|--------------|---------|
| 1      | 4.650         | BV   | 0.1554      | 967.53998    | 94.57198     | 50.1501 |
| 2      | 5.484         | VB   | 0.1770      | 961.74982    | 81.87630     | 49.8499 |

  

| Peak # | RetTime [min] | Type | Width [min] | Area [mAU*s] | Height [mAU] | Area %  |
|--------|---------------|------|-------------|--------------|--------------|---------|
| 1      | 4.850         | MM   | 0.2798      | 1818.07642   | 108.29026    | 96.5682 |
| 2      | 6.147         | MM   | 0.3361      | 64.60916     | 3.20357      | 3.4318  |

**(-)-Methyl (1*S*,5*S*,6*R*)-4-(thiophen-2-yl)tricyclo[4.2.1.0<sup>2,5</sup>]non-3-ene-3-carboxylate (**5ak**):**

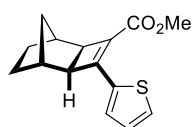

Obtained as colorless oil in 96% yield (25.0 mg). **<sup>1</sup>H NMR** (400 MHz, CDCl<sub>3</sub>)  $\delta$  (ppm) = 7.58 (dd,  $J$  = 3.7, 1.2 Hz, 1H), 7.46 (dd,  $J$  = 5.1, 1.2 Hz, 1H), 7.07 (dd,  $J$  = 5.1, 3.7 Hz, 1H), 3.79 (s, 3H), 2.79 (d,  $J$  = 3.4 Hz, 1H), 2.73 (d,  $J$  = 3.7 Hz, 1H), 2.30 – 2.24 (m, 2H), 1.66 – 1.60 (m, 2H), 1.43 – 1.35 (m, 1H), 1.22 – 1.13 (m, 2H), 1.09 – 1.02 (m, 1H); **<sup>13</sup>C NMR** (101 MHz, CDCl<sub>3</sub>)  $\delta$  (ppm) = 163.5, 148.8, 136.0, 130.4, 130.1, 127.4, 124.2, 51.2, 47.9, 46.4, 34.9, 34.5, 30.9, 28.4, 28.2; **IR (ATR):**  $\tilde{\nu}$  2949, 2869, 1701, 1612, 1233, 1223, 1200, 1131, 1044, 708 cm<sup>-1</sup>; **HRMS (ESI)** calculated for [C<sub>15</sub>H<sub>16</sub>O<sub>2</sub>S+H]<sup>+</sup> : 261.0944, found: 261.0949; **R<sub>f</sub>**: 0.50 (pentane/Et<sub>2</sub>O 8:1); [ $\alpha$ ]<sub>D</sub><sup>20</sup>: - 32.0° (c = 1.0, CHCl<sub>3</sub>).

Chiral HPLC: Chiralpak IA, 4.6 x 250 mm; 1% *i*-PrOH / hexane, 1.0 mL/min, 316 nm;  $t_R$  (major) = 6.4 min,  $t_R$  (minor) = 9.2 min, 97.5:2.5 er.

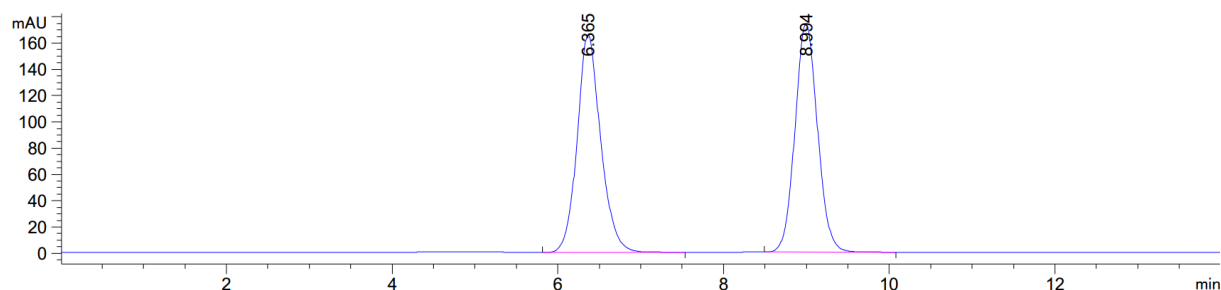

| Peak # | RetTime [min] | Type | Width [min] | Area [mAU*s] | Height [mAU] | Area %  |
|--------|---------------|------|-------------|--------------|--------------|---------|
| 1      | 6.365         | BB   | 0.2939      | 3265.51538   | 165.72089    | 49.8962 |
| 2      | 8.994         | BB   | 0.2949      | 3279.10059   | 173.19914    | 50.1038 |

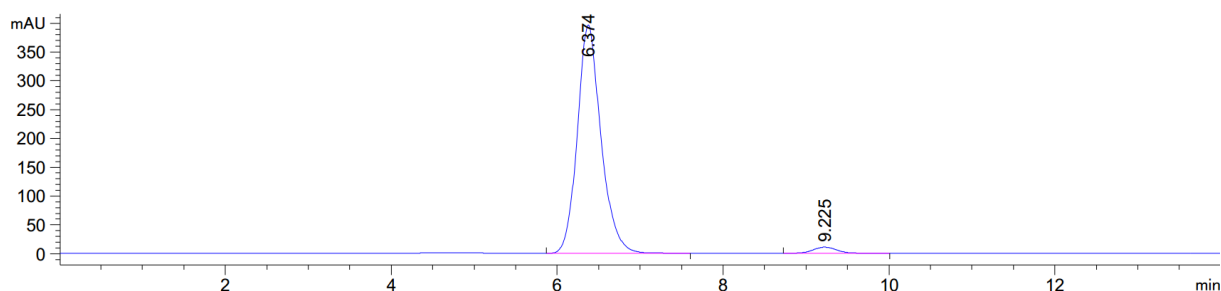

| Peak # | RetTime [min] | Type | Width [min] | Area [mAU*s] | Height [mAU] | Area %  |
|--------|---------------|------|-------------|--------------|--------------|---------|
| 1      | 6.374         | BB   | 0.2948      | 7835.24951   | 396.09171    | 97.4131 |
| 2      | 9.225         | BB   | 0.3014      | 208.07501    | 10.58330     | 2.5869  |

**(+)-Methyl (1*S*,5*S*,6*R*)-4-((*E*-hex-1-en-1-yl)tricyclo[4.2.1.0<sup>2,5</sup>]non-3-ene-3-carboxylate (**5a**):**

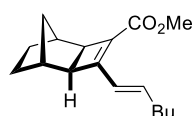

Obtained as colorless oil in 88% yield (23.0 mg). **<sup>1</sup>H NMR** (400 MHz, CDCl<sub>3</sub>)  $\delta$  (ppm) = 6.56 (d,  $J$  = 15.8 Hz, 1H), 6.18 – 5.97 (m, 1H), 3.71 (s, 3H), 2.59 (d,  $J$  = 3.6 Hz, 1H), 2.56 (d,  $J$  = 3.6 Hz, 1H), 2.23 – 2.13 (m, 3H), 2.09 (d,  $J$  = 3.4 Hz, 1H), 1.64 – 1.50 (m, 2H), 1.46 – 1.24 (m, 5H), 1.17 – 1.05 (m, 2H), 1.01 (d,  $J$  = 10.4 Hz, 1H), 0.90 (t,  $J$  = 7.2 Hz, 3H); **<sup>13</sup>C NMR** (101 MHz, CDCl<sub>3</sub>)  $\delta$  (ppm) = 163.9, 156.3, 141.1, 126.5, 123.4, 51.0, 46.4, 46.0, 34.7, 34.2, 32.8, 31.1, 30.9, 28.4, 28.3, 22.5, 14.1; **IR (ATR):**  $\tilde{\nu}$  2952, 2871, 1709, 1644, 1434, 1227, 1192, 1117, 973 cm<sup>-1</sup>; **HRMS (APCI)** calculated for [C<sub>17</sub>H<sub>24</sub>O<sub>2</sub>]<sup>+</sup> : 260.1771, found: 260.1764; **R<sub>f</sub>**: 0.20 (pentane/DCM 3:1); **[ $\alpha$ ]<sub>D</sub><sup>20</sup>**: + 35.5° (c = 1.0, CHCl<sub>3</sub>).

Chiral HPLC: Chiralpak IA, 4.6 x 250 mm; 0.5% *i*-PrOH / hexane, 1.0 mL/min, 272 nm;  $t_R$  (minor) = 9.6 min,  $t_R$  (major) = 12.0 min, 83:17 er.

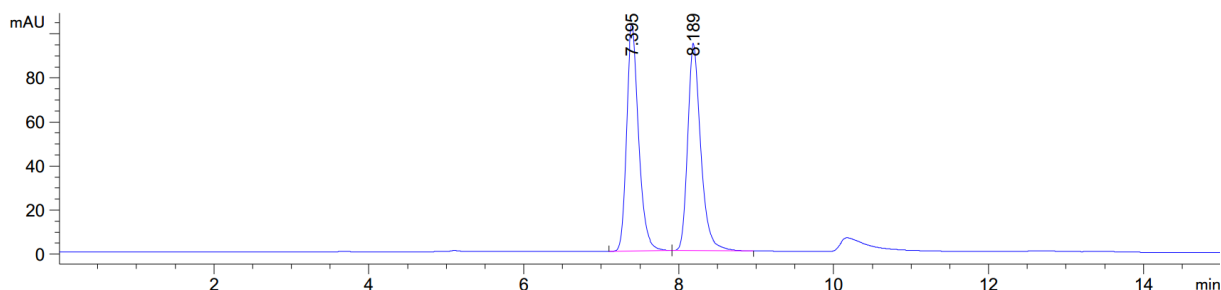

| Peak # | RetTime [min] | Type | Width [min] | Area [mAU*s] | Height [mAU] | Area %  |
|--------|---------------|------|-------------|--------------|--------------|---------|
| 1      | 7.395         | BB   | 0.1637      | 1109.27661   | 102.93884    | 50.0095 |
| 2      | 8.189         | BB   | 0.1796      | 1108.85583   | 94.03324     | 49.9905 |

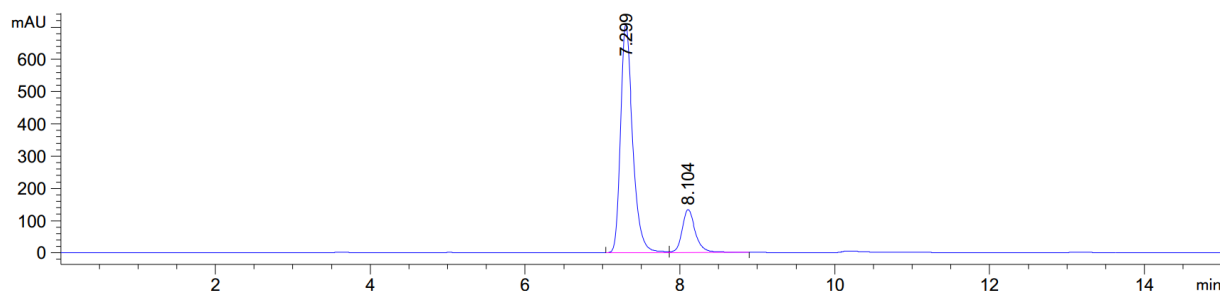

| Peak # | RetTime [min] | Type | Width [min] | Area [mAU*s] | Height [mAU] | Area %  |
|--------|---------------|------|-------------|--------------|--------------|---------|
| 1      | 7.299         | BV   | 0.1642      | 7657.50244   | 707.94055    | 82.9698 |
| 2      | 8.104         | VB   | 0.1778      | 1571.75830   | 133.02415    | 17.0302 |

**(+)-*tert*-butyl (1*S*,5*S*,6*R*)-4-cyclopropyltricyclo[4.2.1.0<sup>2,5</sup>]non-3-ene-3-carboxylate (**5am**):**

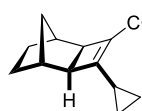

Obtained as colorless oil in 91% yield (23.8 mg). **<sup>1</sup>H NMR** (400 MHz, CDCl<sub>3</sub>)  $\delta$  (ppm) = 2.46 (d,  $J$  = 3.5 Hz, 1H), 2.21 – 2.07 (m, 3H), 1.91 – 1.84 (m, 1H), 1.54 – 1.50 (m, 2H), 1.49 (s, 9H), 1.39 (dt,  $J$  = 10.4, 2.0 Hz, 1H), 1.10 – 0.92 (m, 3H), 0.89 – 0.76 (m, 2H), 0.76 – 0.61 (m, 2H); **<sup>13</sup>C NMR** (101 MHz, CDCl<sub>3</sub>)  $\delta$  (ppm) = 163.4, 163.3, 130.7, 79.7, 45.6, 45.4, 34.7, 34.4, 30.6, 28.5, 28.4, 28.2, 11.5, 7.4, 7.1; **IR (ATR):**  $\tilde{\nu}$  2952, 2870, 1698, 1643, 1365, 1236, 1172, 1137, 1121, 1031 cm<sup>-1</sup>; **HRMS (APCI)** calculated for [C<sub>17</sub>H<sub>24</sub>O<sub>2</sub>+Na]<sup>+</sup> : 283.1669, found: 283.1672; **R<sub>f</sub>**: 0.50 (pentane/Et<sub>2</sub>O 8:1); **[ $\alpha$ ]<sub>D</sub><sup>20</sup>**: + 39.9° (c = 1.0, CHCl<sub>3</sub>).

Chiral HPLC: Chiralpak IC, 4.6 x 250 mm; 0.5% *i*-PrOH / hexane, 1.0 mL/min, 244 nm;  $t_R$  (minor) = 7.0 min,  $t_R$  (major) = 7.5 min, 89:11 er.

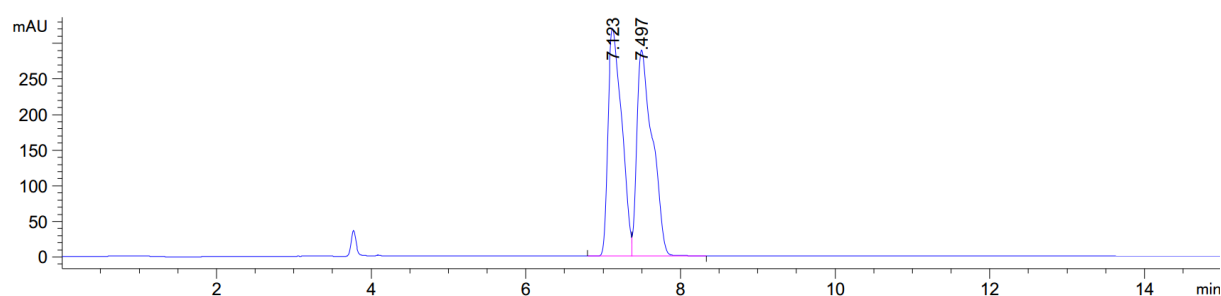

| Peak # | RetTime [min] | Type | Width [min] | Area [mAU*s] | Height [mAU] | Area %  |
|--------|---------------|------|-------------|--------------|--------------|---------|
| 1      | 7.123         | BV   | 0.1773      | 3929.10889   | 319.84192    | 49.4598 |
| 2      | 7.497         | VB   | 0.1960      | 4014.94385   | 289.15137    | 50.5402 |

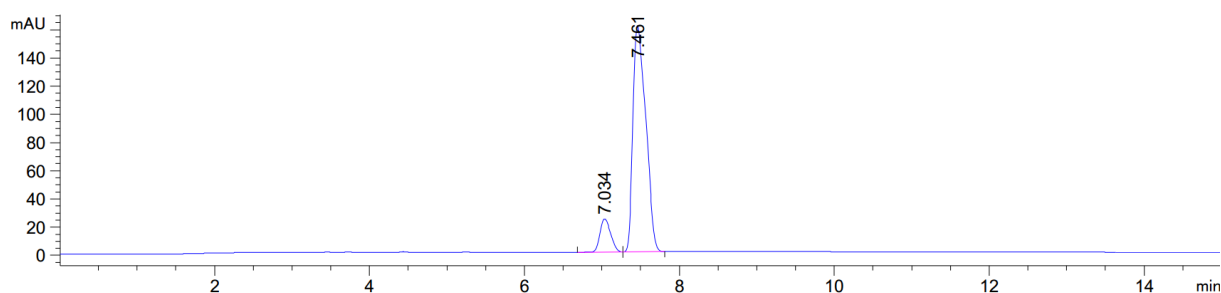

| Peak # | RetTime [min] | Type | Width [min] | Area [mAU*s] | Height [mAU] | Area %  |
|--------|---------------|------|-------------|--------------|--------------|---------|
| 1      | 7.034         | BB   | 0.1575      | 229.62617    | 23.59650     | 11.1153 |
| 2      | 7.461         | BB   | 0.1655      | 1836.22375   | 160.42242    | 88.8847 |

(-)-Methyl (1*S*,5*S*,6*R*)-4-cyclohexyltricyclo[4.2.1.0<sup>2,5</sup>]non-3-ene-3-carboxylate (**5an**):

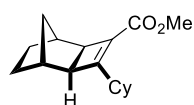

Obtained as yellow oil in 70% yield (18.3 mg). **<sup>1</sup>H NMR** (400 MHz, CDCl<sub>3</sub>) δ (ppm) = δ 3.70 (s, 3H), 2.75 (dt, *J* = 12.1, 6.4 Hz, 1H), 2.49 (d, *J* = 3.4 Hz, 1H), 2.41 (d, *J* = 3.4 Hz, 1H), 2.15 (s, 1H), 2.08 (s, 1H), 1.80 – 1.63 (m, 5H), 1.55 (d, *J* = 9.0 Hz, 2H), 1.38 – 1.32 (m, 1H), 1.33 – 1.10 (m, 5H), 1.12 – 1.01 (m, 2H), 0.98 (d, *J* = 10.3 Hz, 1H); **<sup>13</sup>C NMR** (101 MHz, CDCl<sub>3</sub>) δ (ppm) = 168.7, 163.6, 128.0, 50.9, 47.4, 45.7, 39.1, 34.7, 34.1, 31.0, 30.6, 30.6, 28.5, 28.1, 26.1, 26.1, 25.9; **IR (ATR):**  $\tilde{\nu}$  2926, 2869, 2852, 1715, 1641, 1448, 1434, 1339, 1263, 1215, 1191, 1119 cm<sup>-1</sup>; **HRMS (APCI)** calculated for [C<sub>17</sub>H<sub>24</sub>O<sub>2</sub>+H]<sup>+</sup> : 261.1849, found: 261.1837; **R<sub>f</sub>**: 0.70 (pentane/EtOAc 6:1); **[α]<sub>D</sub><sup>20</sup>**: - 17.2° (c = 1.0, CHCl<sub>3</sub>).

The enantiomeric excess was determined after reduction to the corresponding alcohol and esterification:

(+)-((1*S*,5*S*,6*R*)-4-cyclohexyltricyclo[4.2.1.0<sup>2,5</sup>]non-3-en-3-yl)methyl 4-nitrobenzoate (**5an-benzoate**):

To a solution of **5an** (10.5 mg, 40 μmol, 1.0 equiv.) in toluene (202 μL) was added DIBAL-H (1.2 M in toluene, 70.6 μL, 85 μmol, 2.1 equiv.) at -78 °C under nitrogen atmosphere. The solution was stirred at this temperature for 30 min and then gradually warmed to 0°C. Water, aq. sat. rochelle salt solution and ethyl acetate were added. The layers were separated, the aqueous layer was extracted with ethyl acetate (3x), combined organic layers were dried over Na<sub>2</sub>SO<sub>4</sub> and the solvent was removed under reduced pressure. The crude alcohol was passed through a short silica plug and dissolved in dry DCM (32 μL). Triethylamine (22.5 μL, 161 μmol, 4.0 equiv.) and 4-nitrobenzoyl chloride (22.5 mg, 121 μmol, 3.0 equiv.) were added at 23 °C under nitrogen atmosphere. After 30 min aq. sat. NaHCO<sub>3</sub> solution and DCM were added. The layers were separated, the aqueous layer was extracted with DCM (3x), combined organic layers were dried over MgSO<sub>4</sub> and the solvent was removed under reduced pressure. Purification by column chromatography over silica gel (pentane/Et<sub>2</sub>O 40:1) delivered nitrobenzoate **5an-benzoate** as colorless oil (14.2 mg, 37 μmol, 92% yield over both steps).

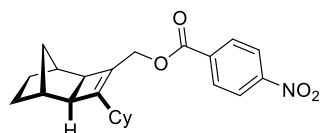

**<sup>1</sup>H NMR** (400 MHz, CDCl<sub>3</sub>) δ (ppm) = 8.30 (d, *J* = 8.5 Hz, 2H), 8.21 (d, *J* = 8.5 Hz, 2H), 4.85 (d, *J* = 12.9 Hz, 1H), 4.78 (d, *J* = 12.9 Hz, 1H), 2.39 (d, *J* = 3.4 Hz, 1H), 2.35 (d, *J* = 3.4 Hz, 1H), 2.26 – 2.16 (m, 1H), 2.02 (s, 1H), 1.98 (s, 1H), 1.78 – 1.69 (m, 4H), 1.65 (d, *J* = 11.2 Hz, 1H), 1.61 – 1.41 (m, 3H), 1.32 – 1.16 (m, 5H), 1.06 – 0.98 (m, 2H), 0.95 (d, *J* = 10.0 Hz, 1H); **<sup>13</sup>C NMR** (101 MHz, CDCl<sub>3</sub>) δ (ppm) = 164.8, 152.7, 150.6, 136.0, 132.0, 130.8, 123.7, 61.0, 47.4, 46.8, 38.3, 34.9, 34.2, 31.8, 31.3, 30.5, 28.5, 28.4, 26.3, 26.2, 26.2; **IR (ATR):**  $\tilde{\nu}$  2924, 2852, 1726, 1530, 1347,

1269, 1101, 719  $\text{cm}^{-1}$ ; **HRMS (ESI)** calculated for  $[\text{C}_{16}\text{H}_{23}]^+$  : 215.1794, found: 215.1792; **R<sub>f</sub>**: 0.70 (pentane/EtOAc 5:1); **[ $\alpha$ ]<sub>D</sub><sup>20</sup>**: + 6.5° (c = 1.0,  $\text{CHCl}_3$ ).

Chiral HPLC: Chiralpak OZH, 4.6 x 250 mm; 0.5% *i*-PrOH / hexane, 1.0 mL/min, 254 nm; *t<sub>R</sub>* (minor) = 11.0 min, *t<sub>R</sub>* (major) = 11.7 min, 86:14 er.

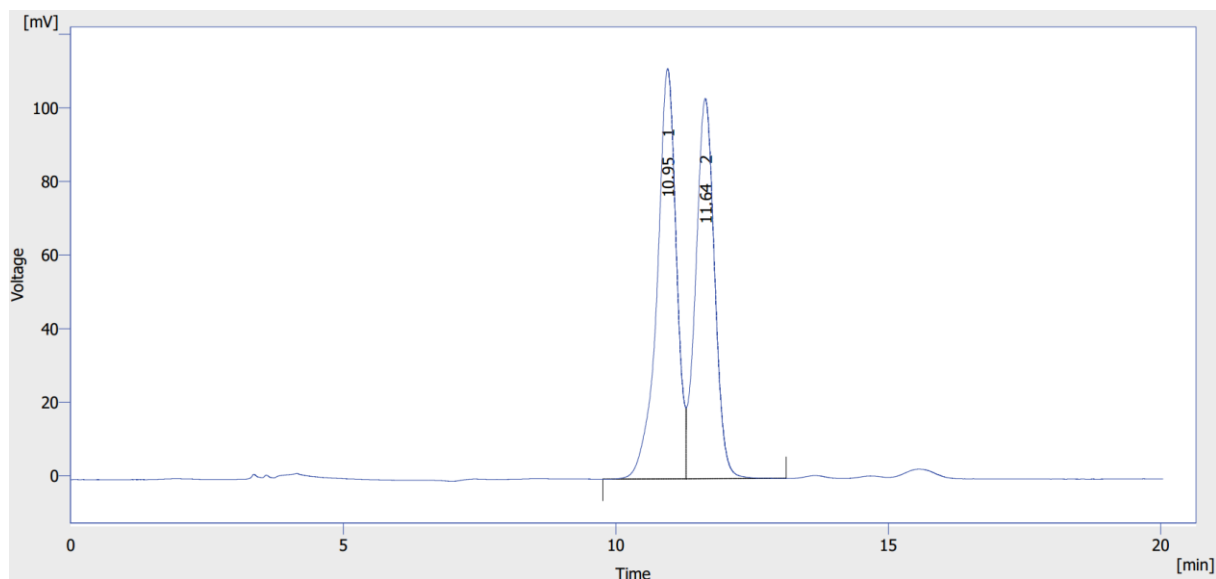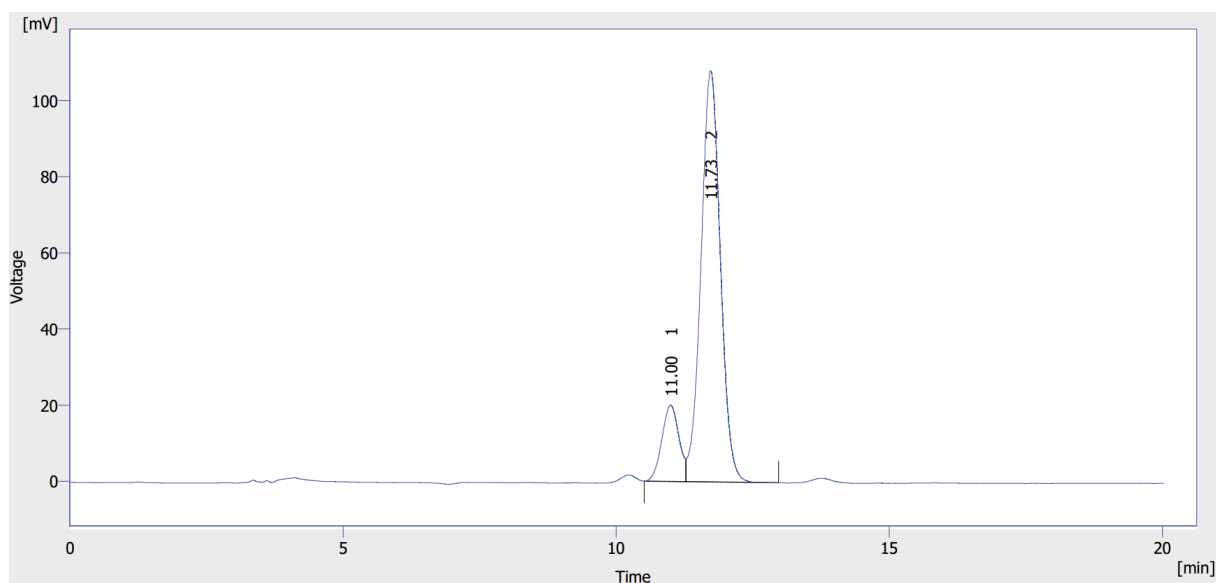

|   | Reten. Time<br>[min] | Area<br>[mV.s] | Height<br>[mV] | Area<br>[%] | Height<br>[%] | W05<br>[min] |
|---|----------------------|----------------|----------------|-------------|---------------|--------------|
| 1 | 10.952               | 2740.677       | 111.553        | 52.4        | 51.9          | 0.36         |
| 2 | 11.643               | 2489.118       | 103.382        | 47.6        | 48.1          | 0.37         |
|   | Total                | 5229.795       | 214.936        | 100.0       | 100.0         |              |

|   | Reten. Time<br>[min] | Area<br>[mV.s] | Height<br>[mV] | Area<br>[%] | Height<br>[%] | W05<br>[min] |
|---|----------------------|----------------|----------------|-------------|---------------|--------------|
| 1 | 10.999               | 437.569        | 20.082         | 14.1        | 15.7          | 0.35         |
| 2 | 11.731               | 2668.055       | 108.040        | 85.9        | 84.3          | 0.38         |
|   | Total                | 3105.624       | 128.122        | 100.0       | 100.0         |              |

(-)-*tert*-butyl (1*R*,5*S*,6*S*)-4-phenyltricyclo[4.2.1.0<sup>2,5</sup>]nona-3,7-diene-3-carboxylate (**5bc**):

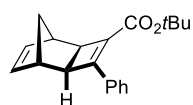

Obtained as colorless oil in 81% yield (23.7 mg). **<sup>1</sup>H NMR** (400 MHz, CDCl<sub>3</sub>)  $\delta$  (ppm) = 8.08 – 8.01 (m, 2H), 7.45 – 7.32 (m, 3H), 6.24 (dd,  $J$  = 5.5, 2.9 Hz, 1H), 6.21 (dd,  $J$  = 5.6, 2.9 Hz, 1H), 2.76 – 2.69 (m, 2H), 2.64 (d,  $J$  = 3.9 Hz, 1H), 2.54 (d,  $J$  = 3.6 Hz, 1H), 1.56 (s, 9H), 1.42 – 1.37 (m, 1H), 1.37 – 1.31 (m, 1H); **<sup>13</sup>C NMR** (101 MHz, CDCl<sub>3</sub>)  $\delta$  (ppm) = **<sup>13</sup>C NMR** (101 MHz, CDCl<sub>3</sub>)  $\delta$  162.9, 156.3, 136.8, 135.6, 132.8, 132.8, 129.9, 128.9, 128.4, 80.6, 43.2, 42.9, 40.0, 39.3, 39.1, 28.5; **IR (ATR):**  $\tilde{\nu}$  2974, 1696, 1367, 1230, 1216, 1167, 1130, 692 cm<sup>-1</sup>; **HRMS (APCI)** calculated for [C<sub>20</sub>H<sub>22</sub>O<sub>2</sub>]<sup>+</sup> : 294.1614, found: 294.1620; **R<sub>f</sub>**: 0.70 (pentane/Et<sub>2</sub>O 8:1); [ $\alpha$ ]<sub>D</sub><sup>20</sup>: - 32.5° (c = 1.0, CHCl<sub>3</sub>, 97:3 er).

The enantiomeric excess was determined after reduction to the corresponding alcohol:

(-)-((1*R*,5*S*,6*S*)-4-phenyltricyclo[4.2.1.0<sup>2,5</sup>]nona-3,7-dien-3-yl)methanol (**5bc-OH**):

To a solution of **5bc** (17.6 mg, 60  $\mu$ mol, 1.0 equiv.) in toluene was added DIBAL-H (1.2 M in toluene, 105  $\mu$ L, 126  $\mu$ mol, 2.1 equiv.) at -78 °C under nitrogen atmosphere. The solution was stirred at this temperature for 30 min and then gradually warmed to 0°C. Water, aq. sat. rochelle salt solution and ethyl acetate were added. The layers were separated, the aqueous layer was extracted with ethyl acetate (3x), combined organic layers were dried over MgSO<sub>4</sub> and the solvent was removed under reduced pressure. Purification by column chromatography over silica gel (pentane/EtOAc 8:1) delivered allylic alcohol **5bc-OH** (9.1 mg, 41  $\mu$ mol, 68% yield).

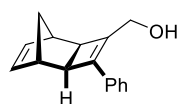

**<sup>1</sup>H NMR** (400 MHz, CDCl<sub>3</sub>)  $\delta$  (ppm) = 7.43 – 7.33 (m, 4H), 7.28 – 7.22 (m, 1H), 6.23 – 6.15 (m, 2H), 4.57 (d,  $J$  = 14.2 Hz, 1H), 4.51 (d,  $J$  = 14.2 Hz, 1H), 2.68 (s, 1H), 2.66 – 2.59 (m, 2H), 2.47 (d,  $J$  = 3.7 Hz, 1H), 1.50 – 1.43 (m, 2H), 1.34 (dt,  $J$  = 9.1, 1.6 Hz, 1H); **<sup>13</sup>C NMR** (101 MHz, CDCl<sub>3</sub>)  $\delta$  (ppm) = 142.7, 142.0, 136.1, 135.7, 134.3, 128.7, 127.6, 126.7, 59.4, 43.2, 42.9, 40.1, 39.2, 39.1; **IR (ATR):**  $\tilde{\nu}$  2968, 1654, 1448, 1321, 1036, 1023, 758, 695 cm<sup>-1</sup>; **HRMS (APCI)** calculated for [C<sub>16</sub>H<sub>16</sub>O]<sup>+</sup> : 224.1196, found: 224.1197; **R<sub>f</sub>**: 0.50 (pentane/EtOAc 3:1); [ $\alpha$ ]<sub>D</sub><sup>20</sup>: - 45.0° (c = 0.3, CHCl<sub>3</sub>).

Chiral HPLC: Chiralpak IA, 4.6 x 250 mm; 10% *i*-PrOH / hexane, 1.0 mL/min, 270 nm;  $t_R$  (major) = 7.3 min,  $t_R$  (minor) = 8.8 min, 97:3 er.

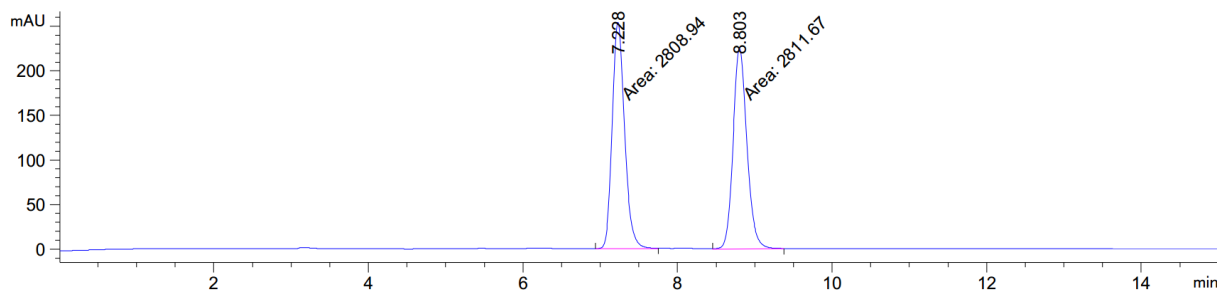

| Peak # | RetTime [min] | Type | Width [min] | Area [mAU*s] | Height [mAU] | Area %  |
|--------|---------------|------|-------------|--------------|--------------|---------|
| 1      | 7.228         | MM   | 0.1839      | 2808.93579   | 254.61382    | 49.9756 |
| 2      | 8.803         | MM   | 0.2076      | 2811.67358   | 225.72432    | 50.0244 |

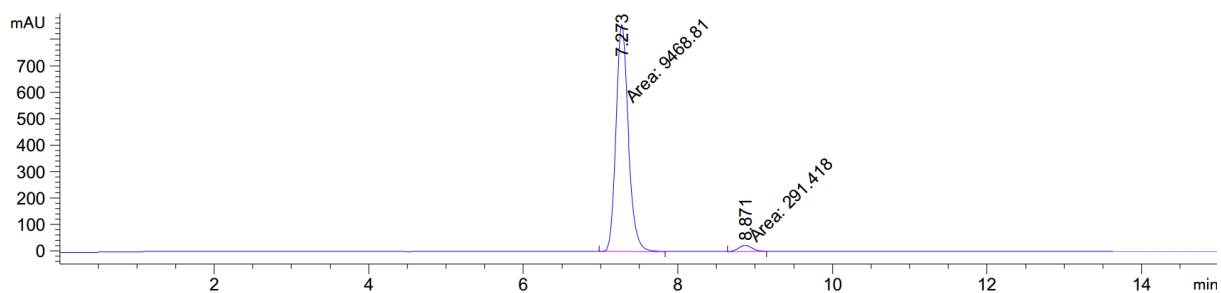

| Peak # | RetTime [min] | Type | Width [min] | Area [mAU*s] | Height [mAU] | Area %  |
|--------|---------------|------|-------------|--------------|--------------|---------|
| 1      | 7.273         | MM   | 0.1838      | 9468.80957   | 858.49847    | 97.0142 |
| 2      | 8.871         | MM   | 0.2057      | 291.41776    | 23.61640     | 2.9858  |



(-)-tert-butyl (2a*S*,3*R*,8*S*)-2-phenyl-2a,3,8,8a-tetrahydro-3,8-methanocyclobuta[b]naphthalene-1-carboxylate (**5cc**):

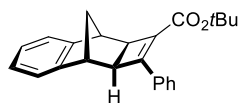

Obtained as white solid in 91% yield (31.5 mg). <sup>1</sup>H NMR (400 MHz, CDCl<sub>3</sub>)

δ (ppm) = 8.13 – 8.06 (m, 2H), 7.47 – 7.35 (m, 3H), 7.30 – 7.22 (m, 2H),

7.14 – 7.07 (m, 2H), 3.26 (s, 1H), 3.24 (s, 1H), 2.81 (d, *J* = 3.5 Hz, 1H),

2.71 (d, *J* = 3.7 Hz, 1H), 1.81 (dt, *J* = 9.9, 1.5 Hz, 1H), 1.72 (dt, *J* = 9.8, 1.5 Hz, 1H), 1.59 (s,

9H); <sup>13</sup>C NMR (101 MHz, CDCl<sub>3</sub>) δ (ppm) = 162.8, 154.5, 148.0, 147.4, 132.6, 131.2, 130.1,

129.1, 128.5, 125.9, 125.7, 121.7, 121.4, 80.9, 45.2, 44.9, 41.4, 41.3, 41.0, 28.5; IR (ATR):  $\tilde{\nu}$

2973, 1696, 1229, 1166, 1145, 1128, 766, 727, 691 cm<sup>-1</sup>; HRMS (APCI) calculated for

[C<sub>24</sub>H<sub>24</sub>O<sub>2</sub>]<sup>+</sup>: 344.1771, found: 344.1776; *R*<sub>f</sub>: 0.60 (pentane/EtOAc 8:1); m.p.: 92-94 °C; [α]<sub>D</sub><sup>20</sup>:

- 128.2° (*c* = 1.0, CHCl<sub>3</sub>).

Chiral HPLC: Chiralpak IB, 4.6 x 250 mm; 1% *i*-PrOH / hexane, 1.0 mL/min, 298 nm; *t*<sub>R</sub> (major)

= 3.9 min, *t*<sub>R</sub> (minor) = 4.8 min, 98:2 er.

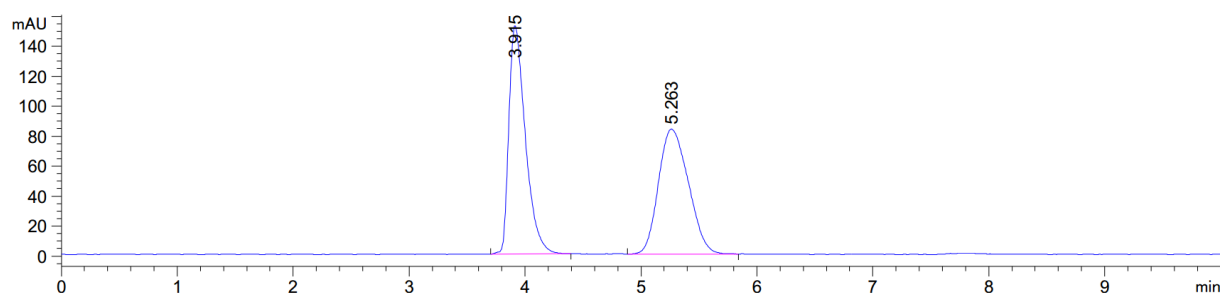

| Peak # | RetTime [min] | Type | Width [min] | Area [mAU*s] | Height [mAU] | Area %  |
|--------|---------------|------|-------------|--------------|--------------|---------|
| 1      | 3.915         | BB   | 0.1514      | 1506.86121   | 152.34244    | 50.2238 |
| 2      | 5.263         | BB   | 0.2830      | 1493.42932   | 83.38171     | 49.7762 |

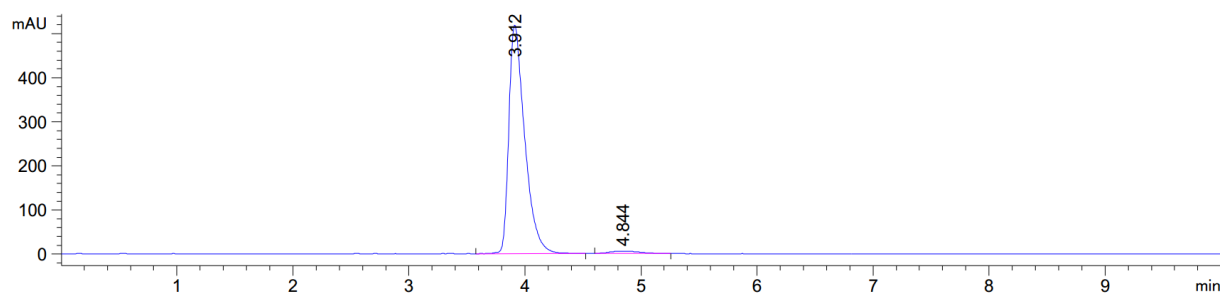

| Peak # | RetTime [min] | Type | Width [min] | Area [mAU*s] | Height [mAU] | Area %  |
|--------|---------------|------|-------------|--------------|--------------|---------|
| 1      | 3.912         | BB   | 0.1433      | 4945.11768   | 518.33606    | 98.0517 |
| 2      | 4.844         | BB   | 0.2217      | 98.25859     | 5.41429      | 1.9483  |

(-)-tert-butyl (2aS,3R,8S)-4,7-dimethoxy-2-phenyl-2a,3,8,8a-tetrahydro-3,8-methanocyclobuta[b]naphthalene-1-carboxylate (**5dc**):

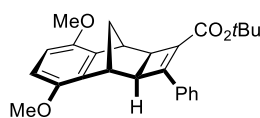

Obtained as colorless oil in 96% yield (38.9 mg). **<sup>1</sup>H NMR** (400 MHz, CDCl<sub>3</sub>) δ (ppm) = 8.15 – 8.08 (m, 2H), 7.46 – 7.35 (m, 3H), 6.69 – 6.59 (m, 2H), 3.84 (s, 3H), 3.82 (s, 3H), 3.56 – 3.51 (m, 1H), 3.51 – 3.47 (m, 1H), 2.82 (d, *J* = 3.4 Hz, 1H), 2.73 (d, *J* = 3.7 Hz, 1H), 1.79 (dt, *J* = 10.0, 1.5 Hz, 1H), 1.66 (dt, *J* = 9.8, 1.5 Hz, 1H), 1.59 (s, 9H); **<sup>13</sup>C NMR** (101 MHz, CDCl<sub>3</sub>) δ (ppm) = 162.7, 154.7, 148.7, 148.7, 137.1, 136.2, 132.6, 131.5, 130.1, 129.1, 128.5, 110.6, 109.7, 80.8, 56.6, 56.2, 44.7, 44.3, 40.8, 38.0, 38.0, 28.5; **IR (ATR):**  $\tilde{\nu}$  2978, 2944, 2832, 1696, 1496, 1279, 1253, 1229, 1163, 1130, 1082, 764 cm<sup>-1</sup>; **HRMS (APCI)** calculated for [C<sub>26</sub>H<sub>28</sub>O<sub>4</sub>]<sup>+</sup> : 404.1982, found: 404.1979; **R<sub>f</sub>**: 0.40 (pentane/EtOAc 6:1); **[α]<sub>D</sub><sup>20</sup>**: - 105.3° (c = 1.0, CHCl<sub>3</sub>).

Chiral HPLC: Chiralpak IB, 4.6 x 250 mm; 1% *i*-PrOH / hexane, 1.0 mL/min, 294 nm; *t<sub>R</sub>* (major) = 5.4 min, *t<sub>R</sub>* (minor) = 7.7 min, 95:5 er.

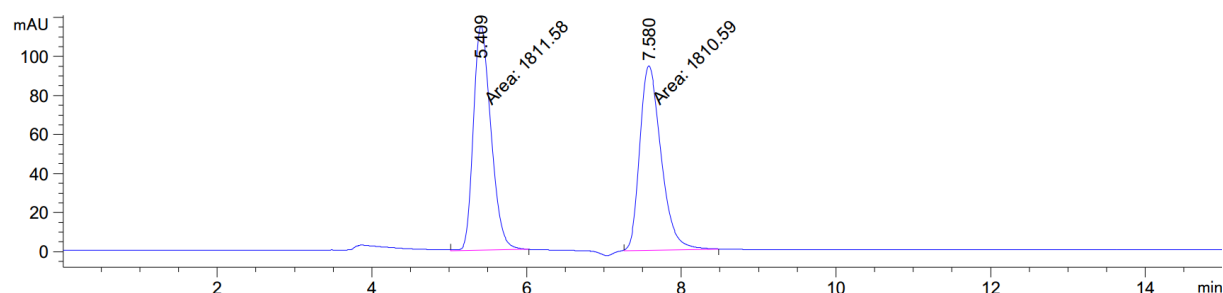

| Peak # | RetTime [min] | Type | Width [min] | Area [mAU*s] | Height [mAU] | Area %  |
|--------|---------------|------|-------------|--------------|--------------|---------|
| 1      | 5.409         | MM   | 0.2636      | 1811.57556   | 114.52752    | 50.0135 |
| 2      | 7.580         | MM   | 0.3199      | 1810.59485   | 94.31976     | 49.9865 |

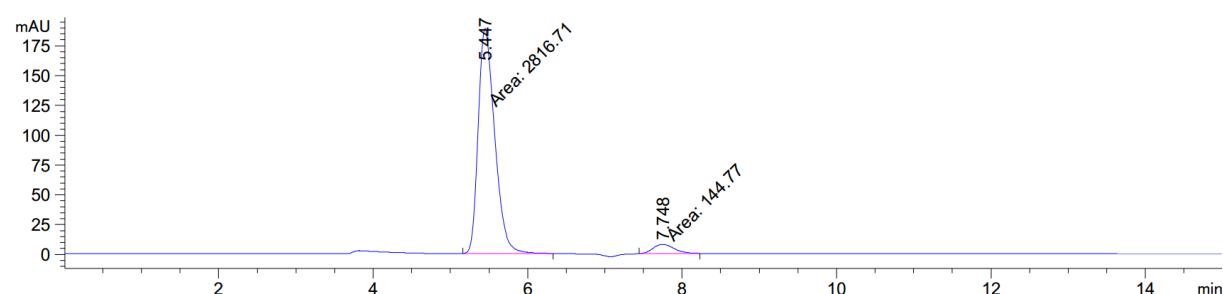

| Peak # | RetTime [min] | Type | Width [min] | Area [mAU*s] | Height [mAU] | Area %  |
|--------|---------------|------|-------------|--------------|--------------|---------|
| 1      | 5.447         | MM   | 0.2485      | 2816.70898   | 188.91588    | 95.1116 |
| 2      | 7.748         | MM   | 0.3151      | 144.76997    | 7.65801      | 4.8884  |

(-)-*tert*-butyl (1*S*,5*S*,6*R*,7*R*,8*S*)-7,8-bis(methoxymethyl)-4-phenyltricyclo[4.2.1.0<sup>2,5</sup>]non-3-ene-3-carboxylate (5ec):

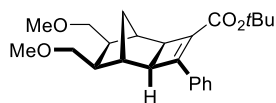

Obtained as white solid in 97% yield (37.3 mg). **<sup>1</sup>H NMR** (400 MHz, CDCl<sub>3</sub>) δ (ppm) = 8.05 – 7.95 (m, 2H), 7.40 – 7.30 (m, 3H), 3.53 – 3.47 (m, 1H), 3.44 – 3.37 (m, 1H), 3.34 (s, 3H), 3.32 (s, 3H), 3.32 – 3.23 (m, 2H), 2.82 (d, *J* = 3.3 Hz, 1H), 2.71 (d, *J* = 3.4 Hz, 1H), 2.25 (s, 1H), 2.22 – 2.17 (m, 1H), 1.94 – 1.84 (m, 2H), 1.53 (s, 9H), 1.27 (s, 2H); **<sup>13</sup>C NMR** (101 MHz, CDCl<sub>3</sub>) δ (ppm) = 162.7, 154.1, 132.9, 130.4, 129.8, 129.0, 128.3, 80.6, 77.5, 77.2, 76.8, 73.0, 72.7, 58.9, 58.7, 46.3, 46.1, 44.7, 44.4, 38.4, 38.1, 28.5, 26.4; **IR (ATR):**  $\tilde{\nu}$  2974, 2924, 1695, 1226, 1172, 1136, 1104, 693 cm<sup>-1</sup>; **HRMS (APCI)** calculated for [C<sub>24</sub>H<sub>32</sub>O<sub>4</sub>]<sup>+</sup>: 384.2295, found: 384.2295; **R<sub>f</sub>**: 0.50 (pentane/EtOAc 6:1); **m.p.**: 96 °C; **[α]<sub>D</sub><sup>20</sup>**: - 13.7° (c = 1.0, CHCl<sub>3</sub>).

Chiral HPLC: Chiralpak IA, 4.6 x 250 mm; 1% *i*-PrOH / hexane, 1.0 mL/min, 288 nm; *t<sub>R</sub>* (minor) = 7.0 min, *t<sub>R</sub>* (major) = 9.9 min, 99:1 er.

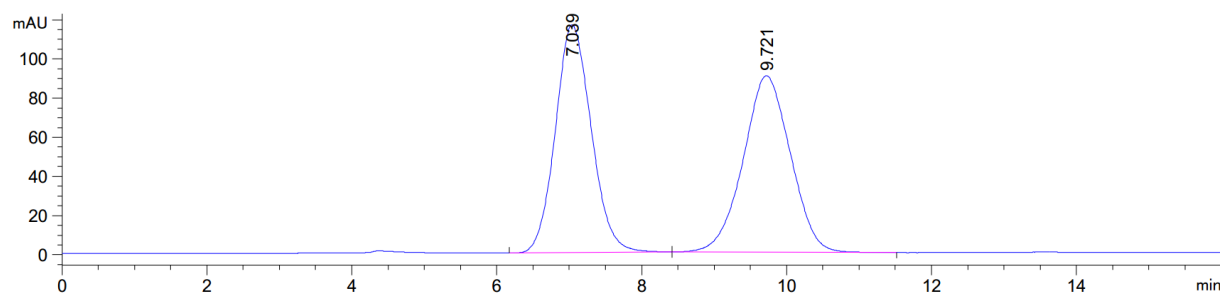

| Peak # | RetTime [min] | Type | Width [min] | Area [mAU*s] | Height [mAU] | Area %  |
|--------|---------------|------|-------------|--------------|--------------|---------|
| 1      | 7.039         | BB   | 0.5296      | 4004.96118   | 116.35474    | 49.5128 |
| 2      | 9.721         | BB   | 0.6782      | 4083.78394   | 90.20544     | 50.4872 |

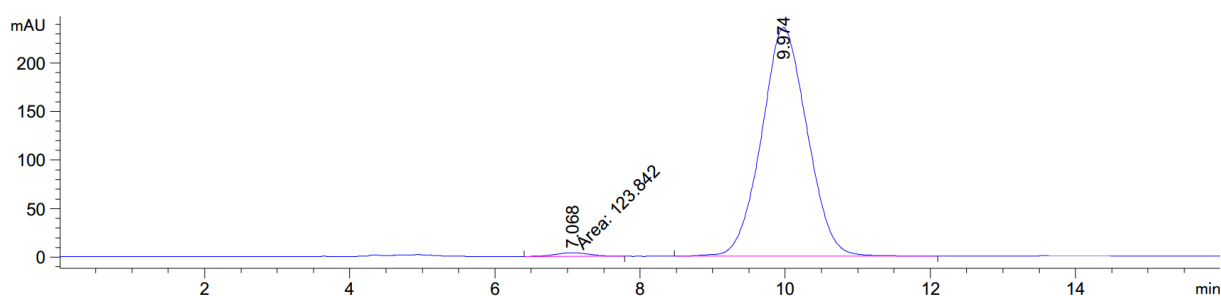

| Peak # | RetTime [min] | Type | Width [min] | Area [mAU*s] | Height [mAU] | Area %  |
|--------|---------------|------|-------------|--------------|--------------|---------|
| 1      | 7.068         | MM   | 0.5540      | 123.84190    | 3.72540      | 1.1915  |
| 2      | 9.974         | BB   | 0.6668      | 1.02700e4    | 235.48444    | 98.8085 |

(-)-tert-butyl (1S,5S,6R,7S,8R)-7,8-bis(methoxymethyl)-4-phenyltricyclo[4.2.1.0<sup>2,5</sup>]non-3-ene-3-carboxylate (**5fc**):

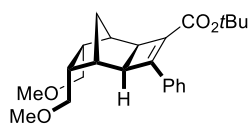

Obtained as colorless oil in 39% yield (14.8 mg). **<sup>1</sup>H NMR** (400 MHz, CDCl<sub>3</sub>) δ (ppm) = 8.02 – 7.94 (m, 2H), 7.41 – 7.29 (m, 3H), 3.55 – 3.48 (m, 2H), 3.45 (d, *J* = 5.8 Hz, 2H), 3.40 (s, 3H), 3.36 (s, 3H), 3.07 (d, *J* = 3.5 Hz, 1H), 2.89 (d, *J* = 3.5 Hz, 1H), 2.40 (d, *J* = 2.0 Hz, 4H), 1.57 – 1.54 (m, 1H), 1.53 (s, 9H), 1.17 – 1.10 (m, 1H); **<sup>13</sup>C NMR** (101 MHz, CDCl<sub>3</sub>) δ (ppm) = 162.4, 153.8, 132.8, 129.8, 129.6, 129.0, 128.4, 80.5, 70.4, 69.9, 59.1, 58.9, 40.8, 40.1, 40.0, 39.9, 37.9, 37.8, 32.0, 28.4; **IR (ATR):**  $\tilde{\nu}$  2972, 2918, 1695, 1228, 1172, 1139, 1101, 771 cm<sup>-1</sup>; **HRMS (APCI)** calculated for [C<sub>24</sub>H<sub>32</sub>O<sub>4</sub>]<sup>+</sup>: 384.2295, found: 384.2293; **R<sub>f</sub>**: 0.40 (pentane/EtOAc 6:1); **[α]<sub>D</sub><sup>20</sup>**: - 30.1° (c = 1.0, CHCl<sub>3</sub>).

Chiral HPLC: Chiralpak ID, 4.6 x 250 mm; 1% *i*-PrOH / hexane, 1.0 mL/min, 290 nm; *t<sub>R</sub>* (minor) = 8.5 min, *t<sub>R</sub>* (major) = 9.7 min, 90.5:9.5 er.

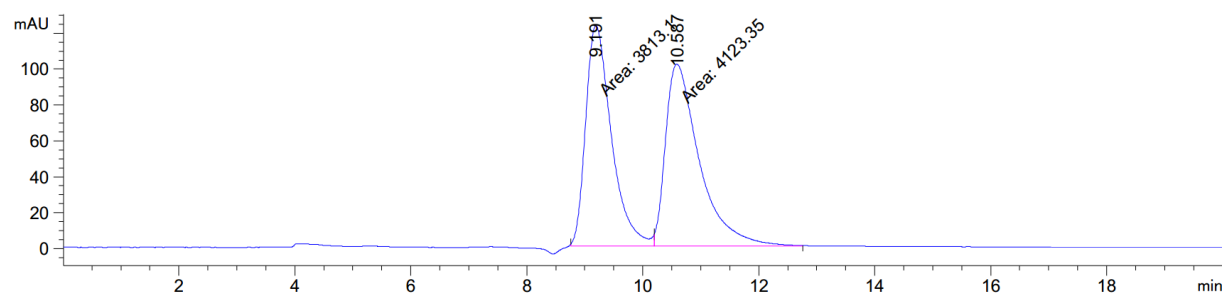

| Peak # | RetTime [min] | Type | Width [min] | Area [mAU*s] | Height [mAU] | Area %  |
|--------|---------------|------|-------------|--------------|--------------|---------|
| 1      | 9.191         | MF   | 0.5165      | 3813.10107   | 123.04875    | 48.0454 |
| 2      | 10.587        | FM   | 0.6772      | 4123.34766   | 101.48427    | 51.9546 |

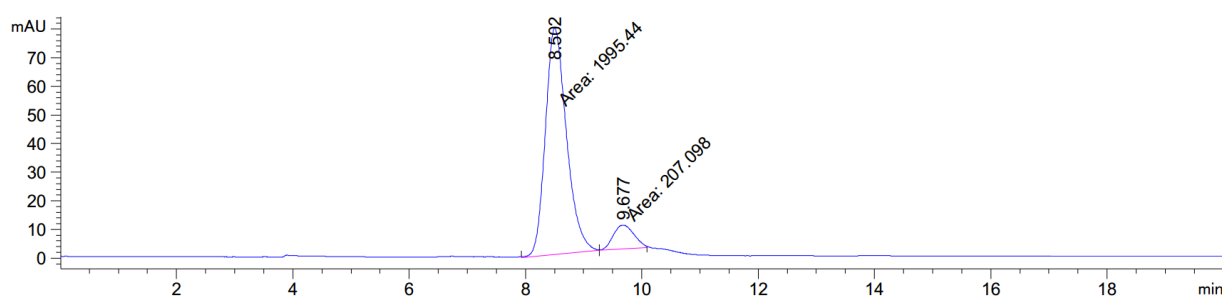

| Peak # | RetTime [min] | Type | Width [min] | Area [mAU*s] | Height [mAU] | Area %  |
|--------|---------------|------|-------------|--------------|--------------|---------|
| 1      | 8.502         | MM   | 0.4202      | 1995.43848   | 79.15076     | 90.5973 |
| 2      | 9.677         | MM   | 0.4122      | 207.09776    | 8.37307      | 9.4027  |

(-)-tert-butyl (2a*S*,3*R*,8*S*)-2-phenyl-2a,3,8,8a-tetrahydro-3,8-epoxycyclobuta[*b*]naphthalene-1-carboxylate (**5gc**):

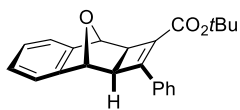

Obtained as colorless oil in 87% yield (30.2 mg). **<sup>1</sup>H NMR** (400 MHz, CDCl<sub>3</sub>) δ (ppm) = 8.13 – 8.05 (m, 2H), 7.48 – 7.40 (m, 3H), 7.39 – 7.32 (m, 2H), 7.24 – 7.17 (m, 2H), 5.20 (s, 1H), 5.15 (s, 1H), 3.00 (d, *J* = 3.6 Hz, 1H), 2.89 (d, *J* = 3.6 Hz, 1H), 1.60 (s, 9H); **<sup>13</sup>C NMR** (101 MHz, CDCl<sub>3</sub>) δ (ppm) = 162.4, 153.3, 144.9, 144.5, 132.2, 130.3, 130.1, 129.0, 128.5, 127.0, 126.9, 120.1, 119.8, 81.3, 76.4, 76.3, 45.0, 44.6, 28.5; **IR (ATR):**  $\tilde{\nu}$  2974, 1696, 1249, 1219, 1161, 1125, 775, 738 cm<sup>-1</sup>; **HRMS (APCI)** calculated for [C<sub>23</sub>H<sub>22</sub>O<sub>3</sub>]<sup>+</sup> : 346.1563, found: 346.1568; **R<sub>f</sub>**: 0.50 (pentane/EtOAc 8:1); **m.p.**: 149-151 °C; [ $\alpha$ ]<sub>D</sub><sup>20</sup>: - 41.3.1° (c = 0.5, CHCl<sub>3</sub>).

Chiral HPLC: Chiralpak IB, 4.6 x 250 mm; 2% *i*-PrOH / hexane, 1.0 mL/min, 292 nm; *t<sub>R</sub>* (minor) = 9.6 min, *t<sub>R</sub>* (major) = 12.0 min, 80:20 er.

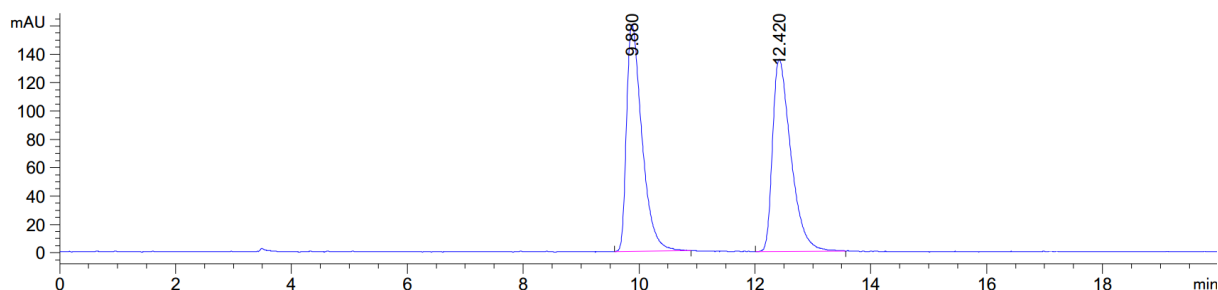

| Peak # | RetTime [min] | Type | Width [min] | Area [mAU*s] | Height [mAU] | Area %  |
|--------|---------------|------|-------------|--------------|--------------|---------|
| 1      | 9.880         | BB   | 0.2798      | 2962.73877   | 160.17528    | 49.7913 |
| 2      | 12.420        | BV   | 0.3290      | 2987.57983   | 135.62543    | 50.2087 |

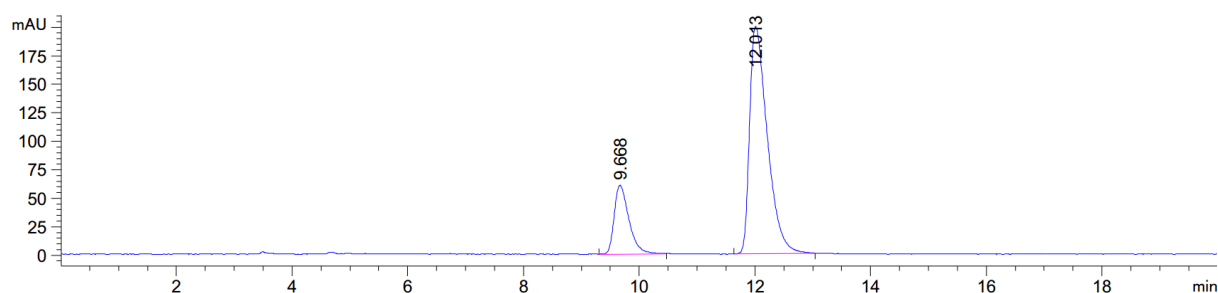

| Peak # | RetTime [min] | Type | Width [min] | Area [mAU*s] | Height [mAU] | Area %  |
|--------|---------------|------|-------------|--------------|--------------|---------|
| 1      | 9.668         | BV   | 0.2619      | 1063.95435   | 60.27497     | 20.0261 |
| 2      | 12.013        | BB   | 0.3124      | 4248.89404   | 199.52237    | 79.9739 |

# NMR Spectra

## Ligand synthesis

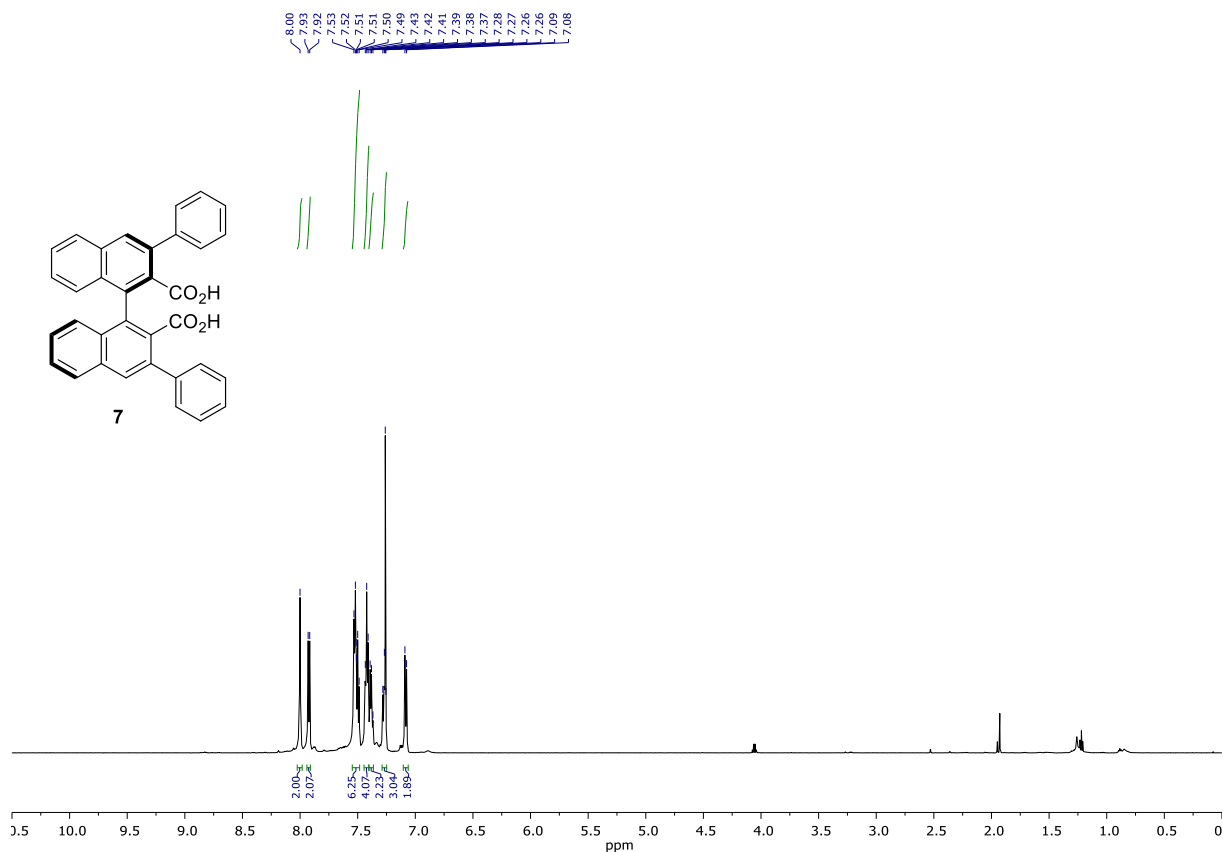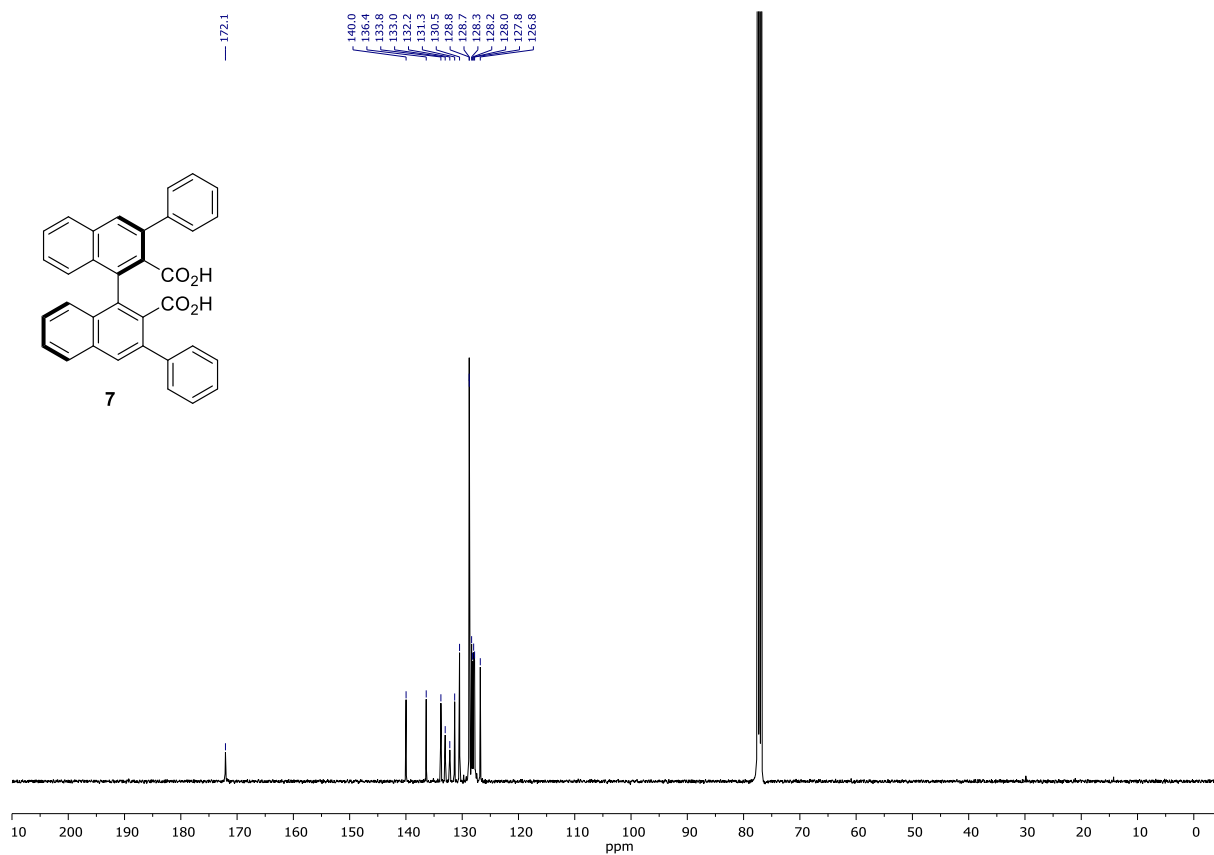

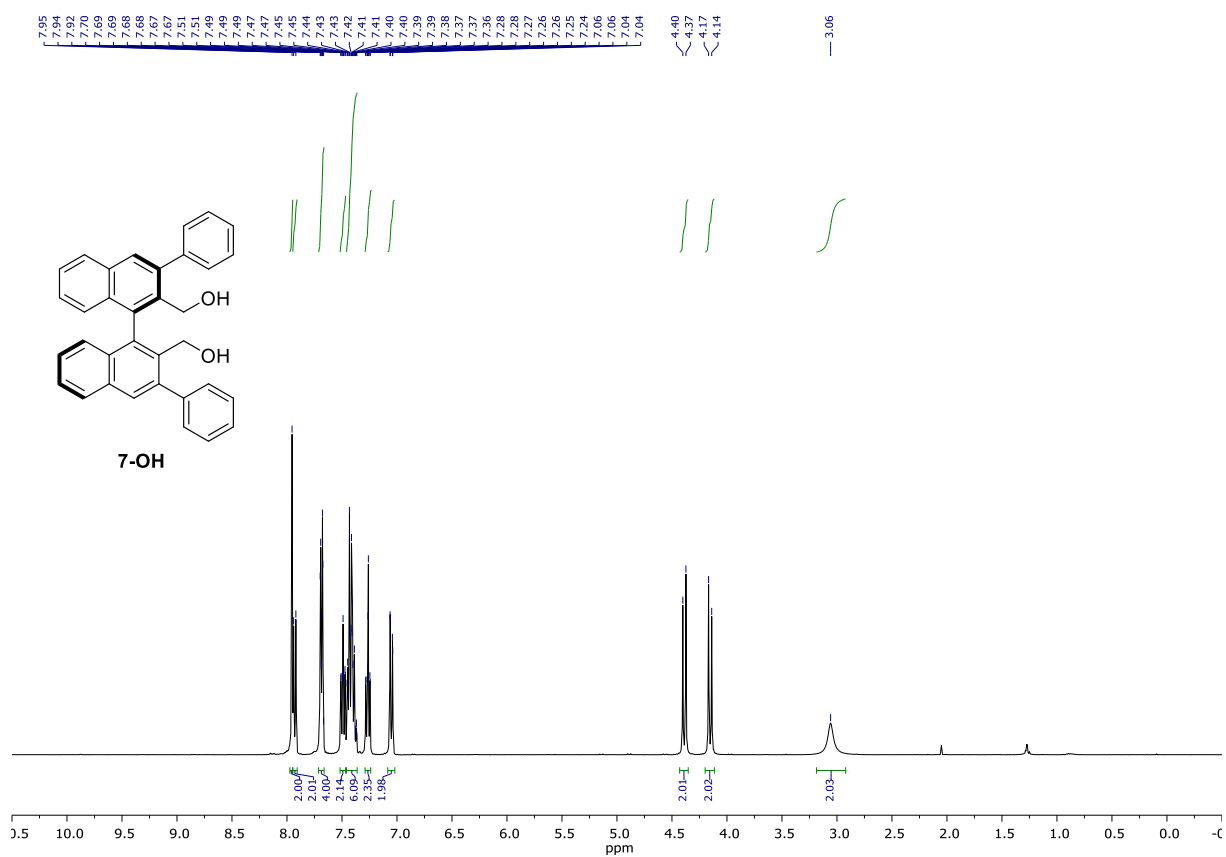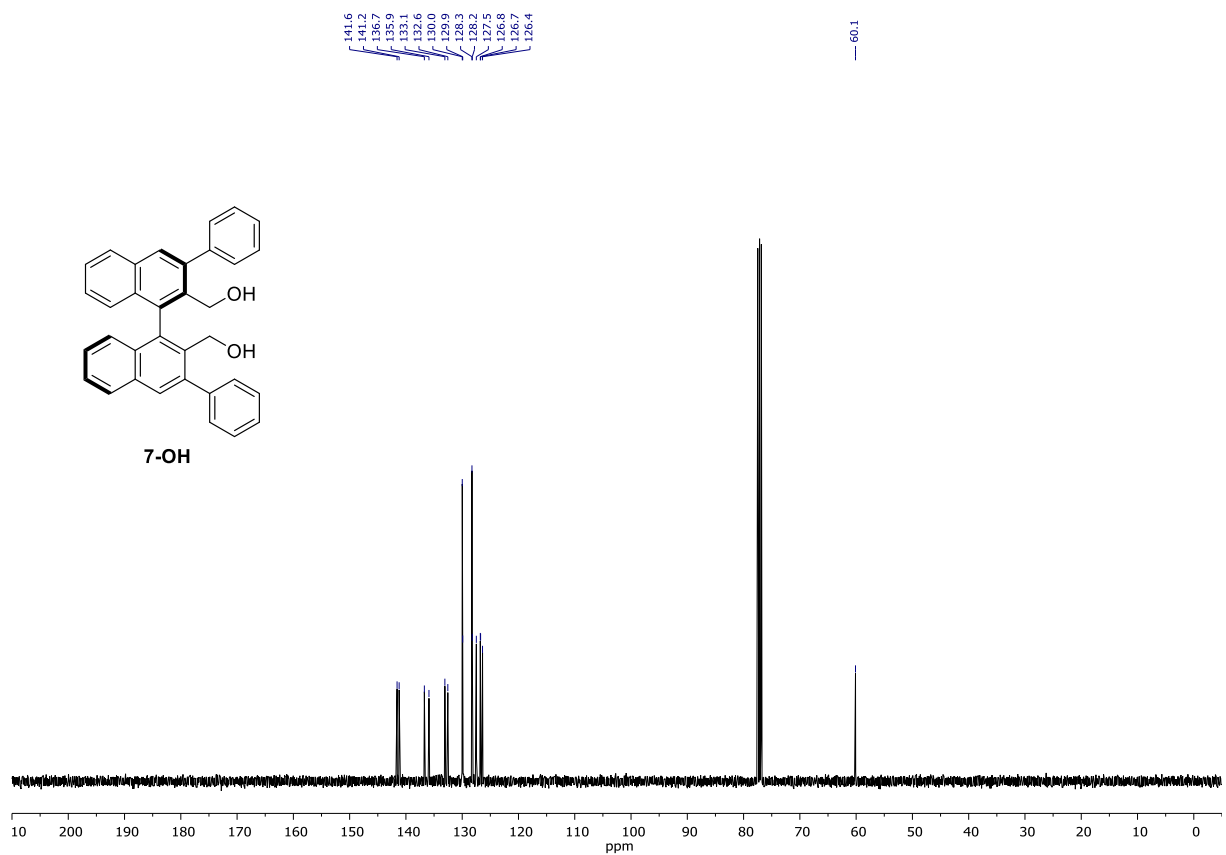

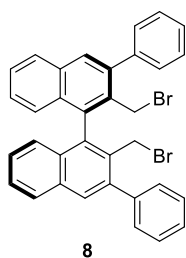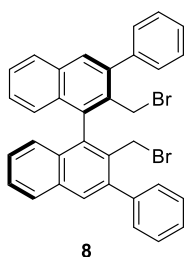



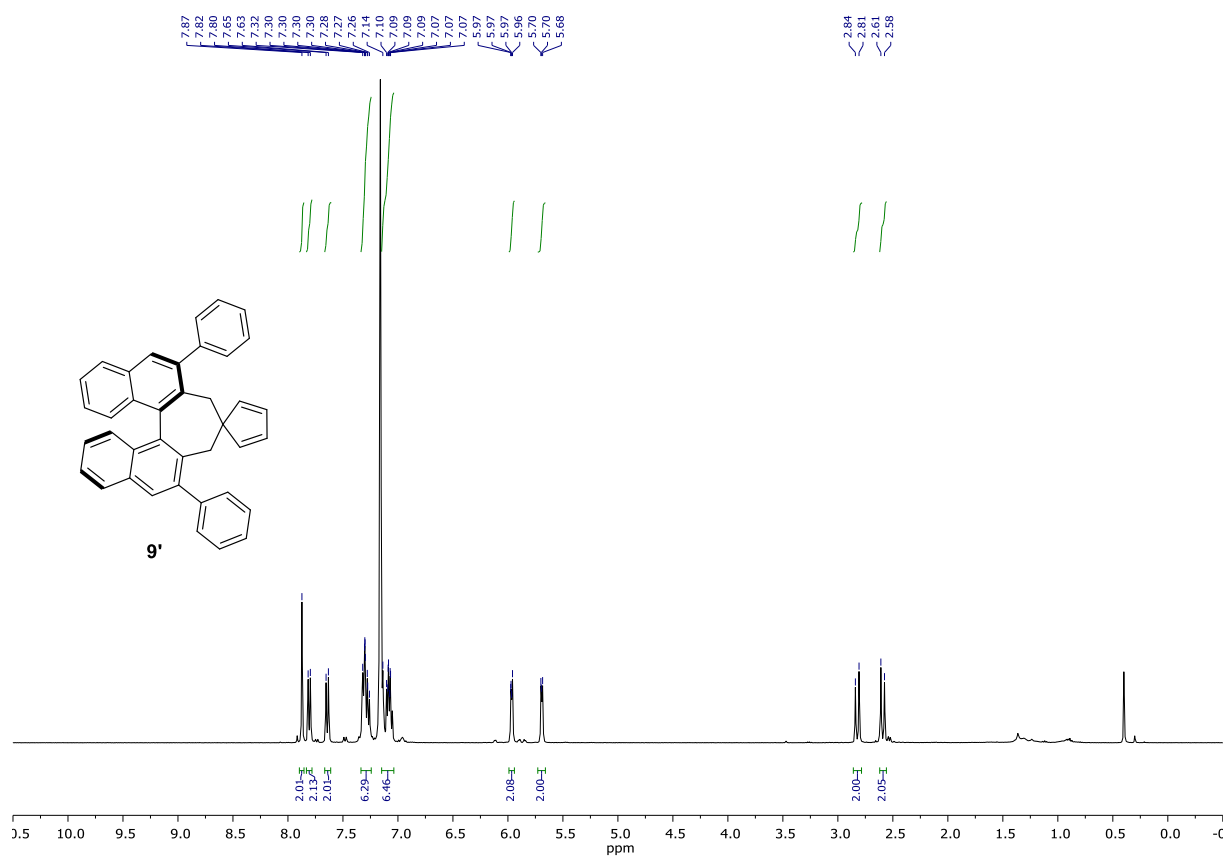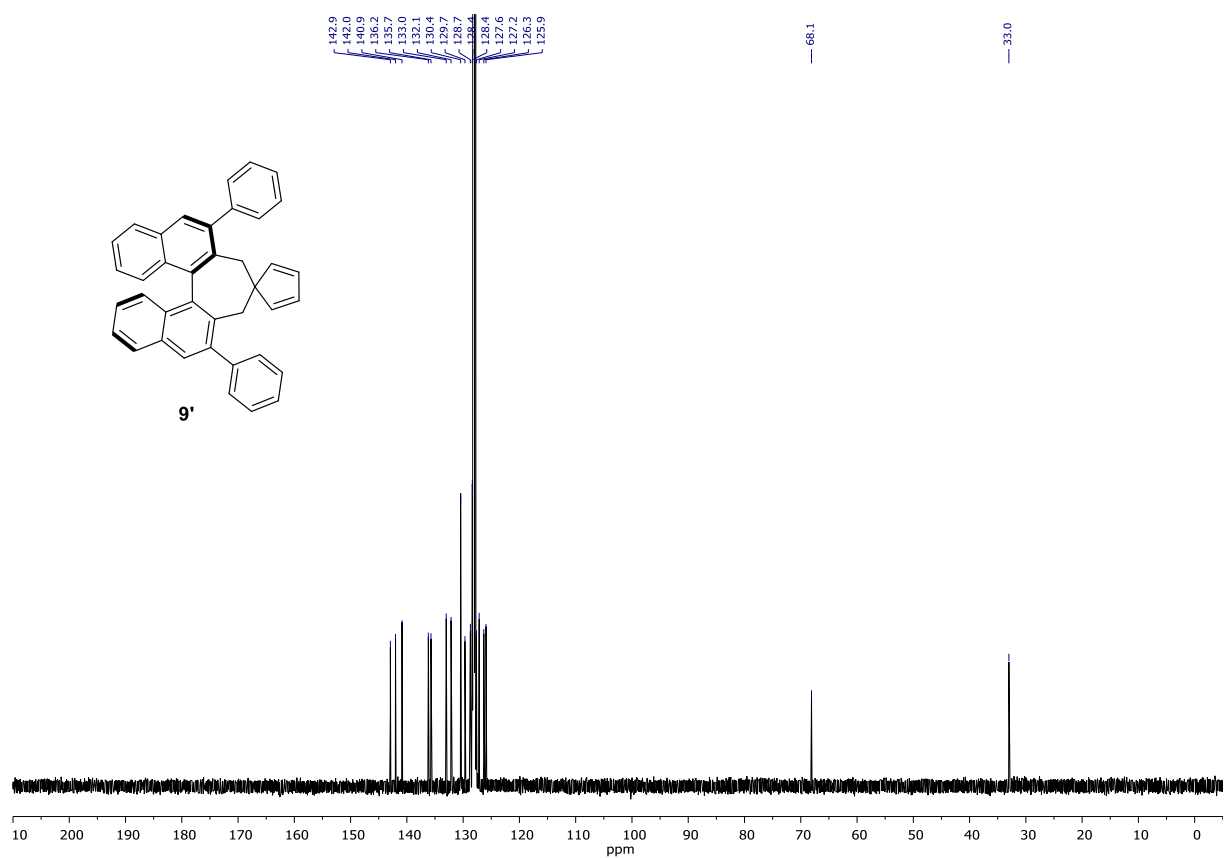

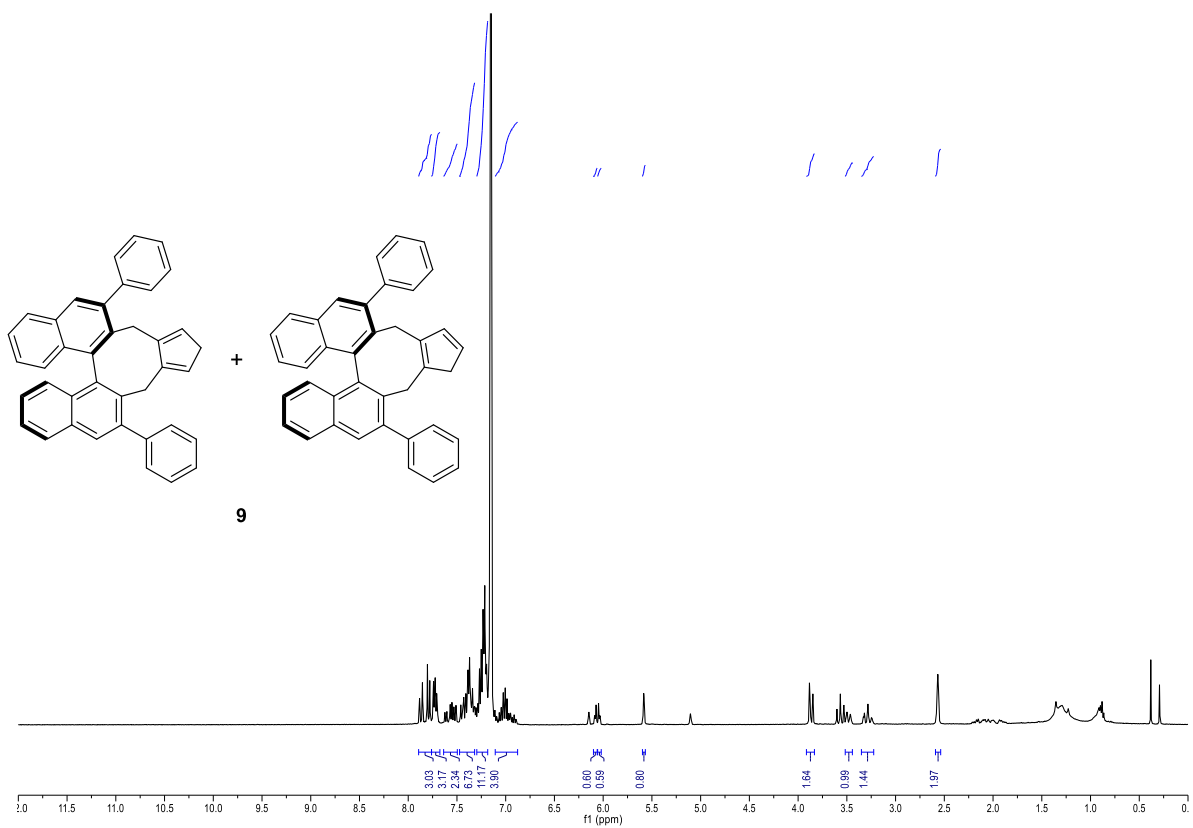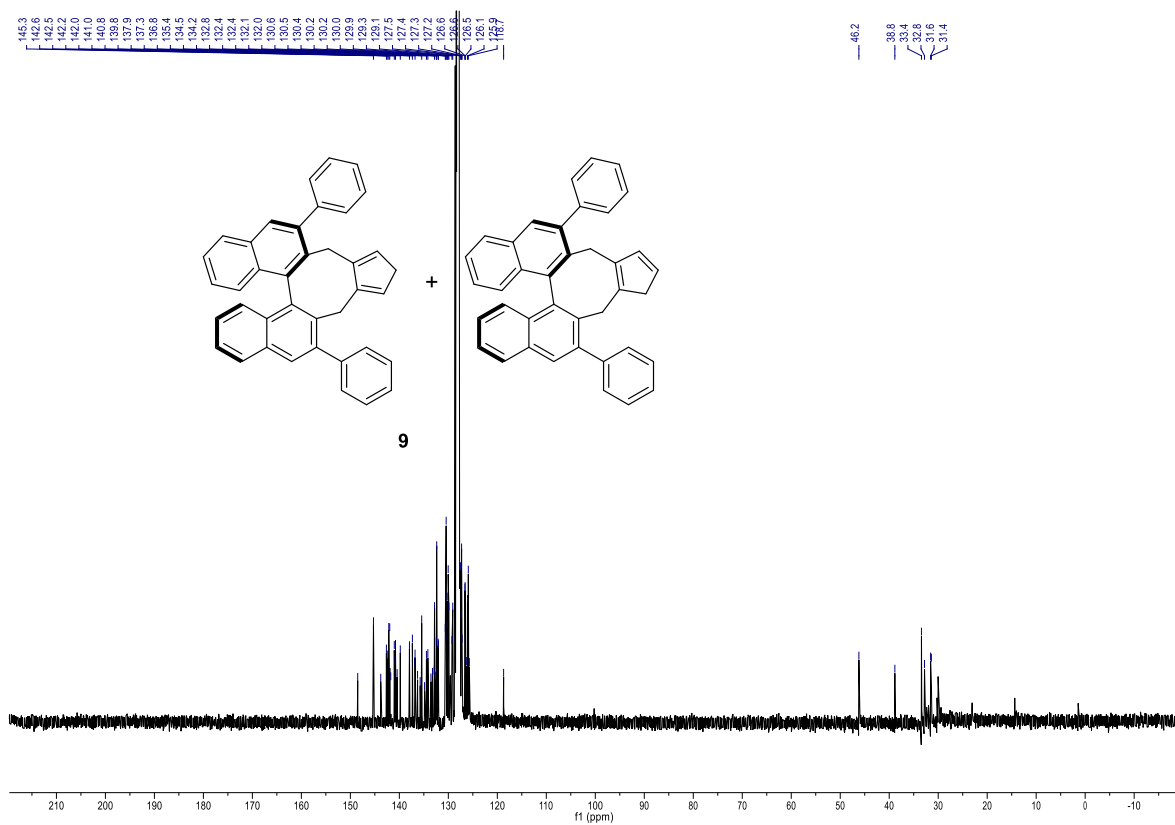

**11**

c1ccc2c(c1)c3ccccc3c2C4=CC=CC=C4C5=CC=CC=C5Ru67C8=CC=CC=C8C9=CC=CC=C9C10=CC=CC=C10Cl[C@H]12CCC[C@H]1C2

<sup>1</sup>H NMR spectrum (CDCl<sub>3</sub>) of compound **11**. The x-axis represents the chemical shift in ppm, ranging from 0.5 to 10.0. The spectrum shows several multiplets in the aromatic region (7.0–8.0 ppm) and a cluster of multiplets in the aliphatic region (1.0–1.5 ppm). A triplet at 7.26 ppm corresponds to the CDCl<sub>3</sub> solvent. Integration values are indicated below the peaks.

| Chemical Shift (ppm) | Integration |
|----------------------|-------------|
| ~7.9                 | 2.05        |
| ~7.8                 | 1.15        |
| ~7.7                 | 1.07        |
| ~7.6                 | 2.06        |
| ~7.5                 | 5.68        |
| ~7.4                 | 4.72        |
| ~7.3                 | 1.36        |
| ~7.2                 | 1.26        |
| ~7.1                 | 1.12        |
| ~7.0                 | 0.96        |
| 7.26 (solvent)       | -           |
| ~4.3                 | 1.00        |
| ~4.2                 | 0.88        |
| ~4.1                 | 1.00        |
| ~4.0                 | 1.98        |
| ~3.9                 | 0.99        |
| ~3.8                 | 1.00        |
| ~3.7                 | 0.99        |
| ~3.6                 | 1.04        |
| ~3.5                 | 1.91        |
| ~3.4                 | 1.00        |
| ~3.3                 | 0.97        |
| ~1.4                 | 1.03        |
| ~1.2                 | 1.05        |

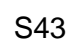

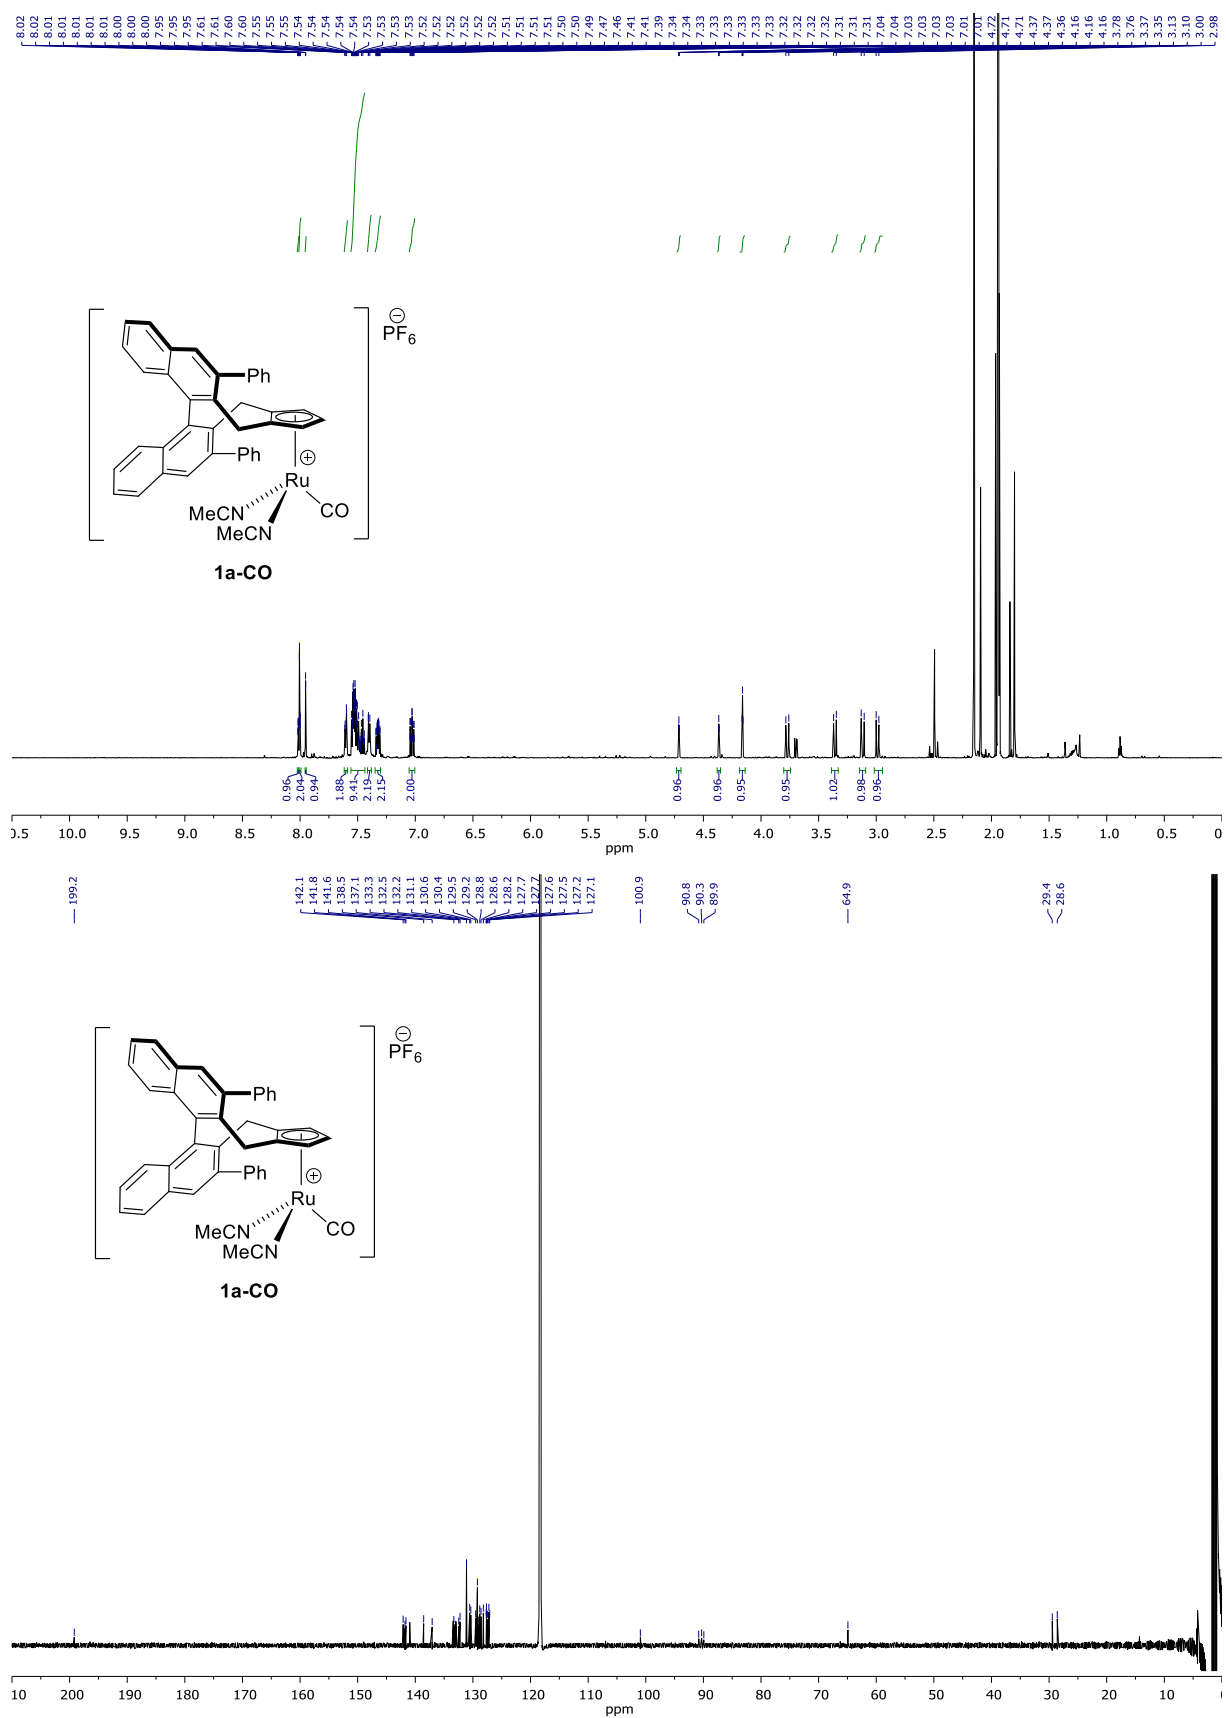

# Starting alkyne:

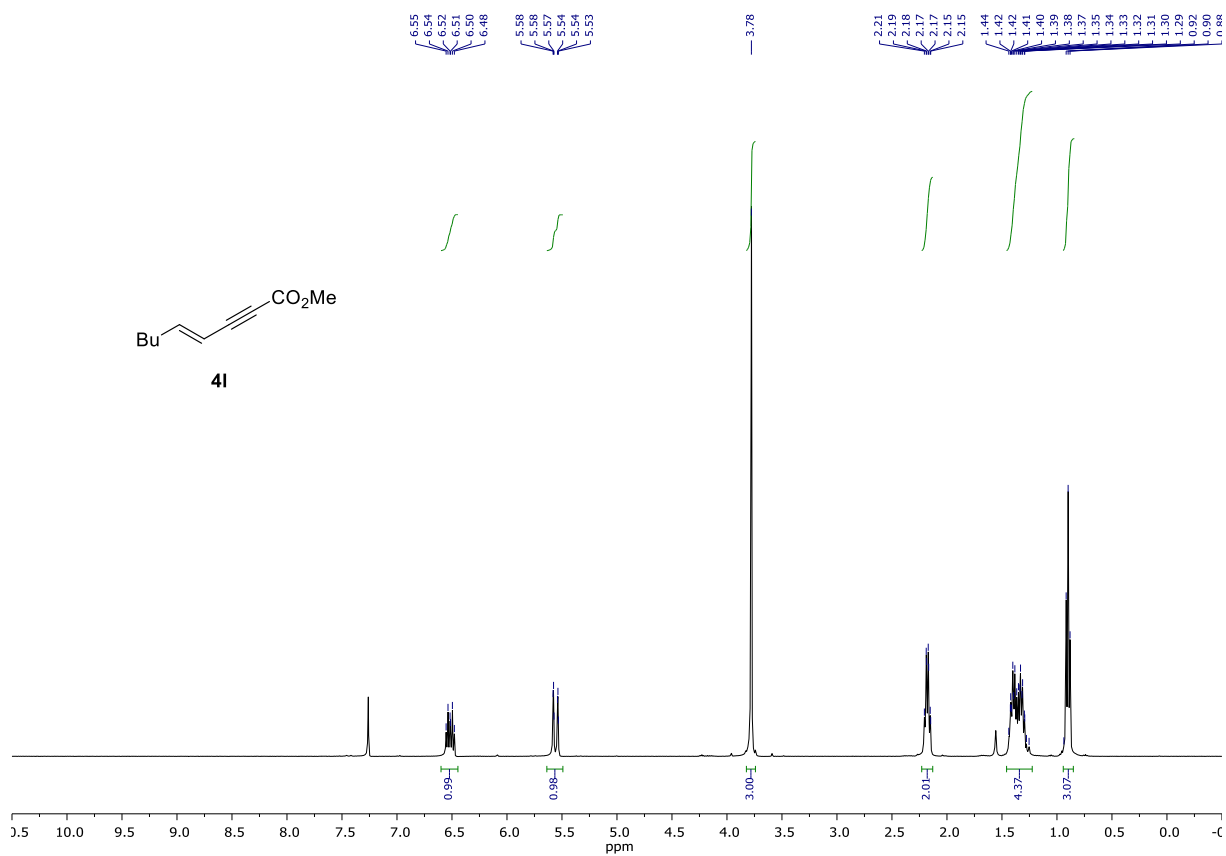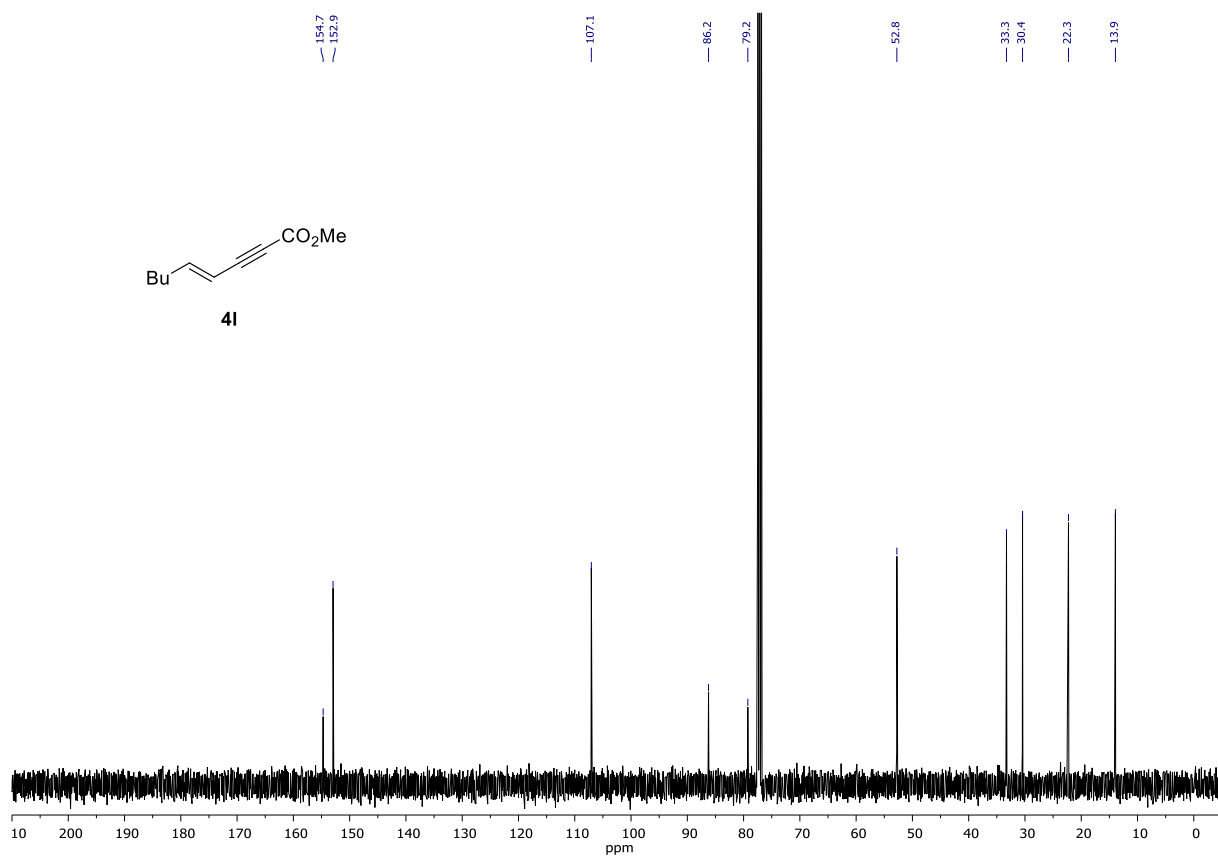

# Cyclobutenes:

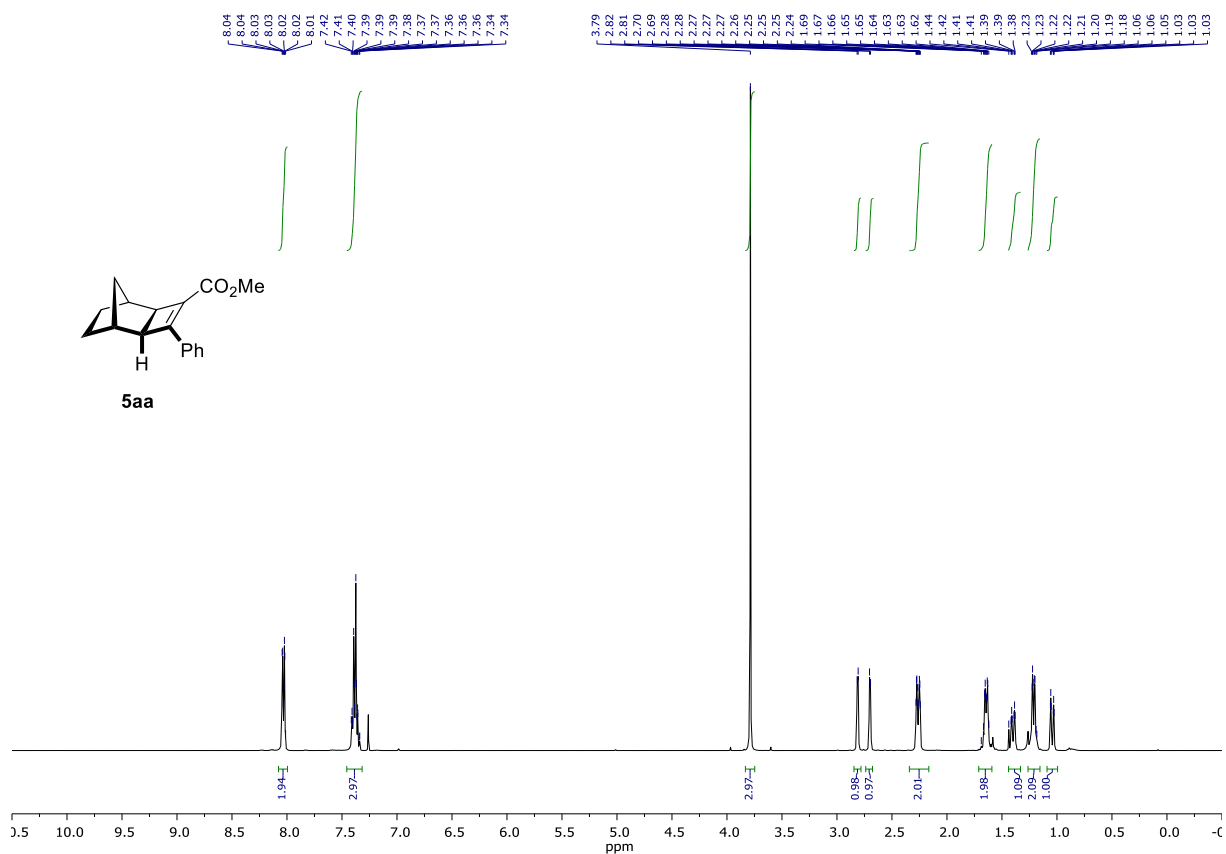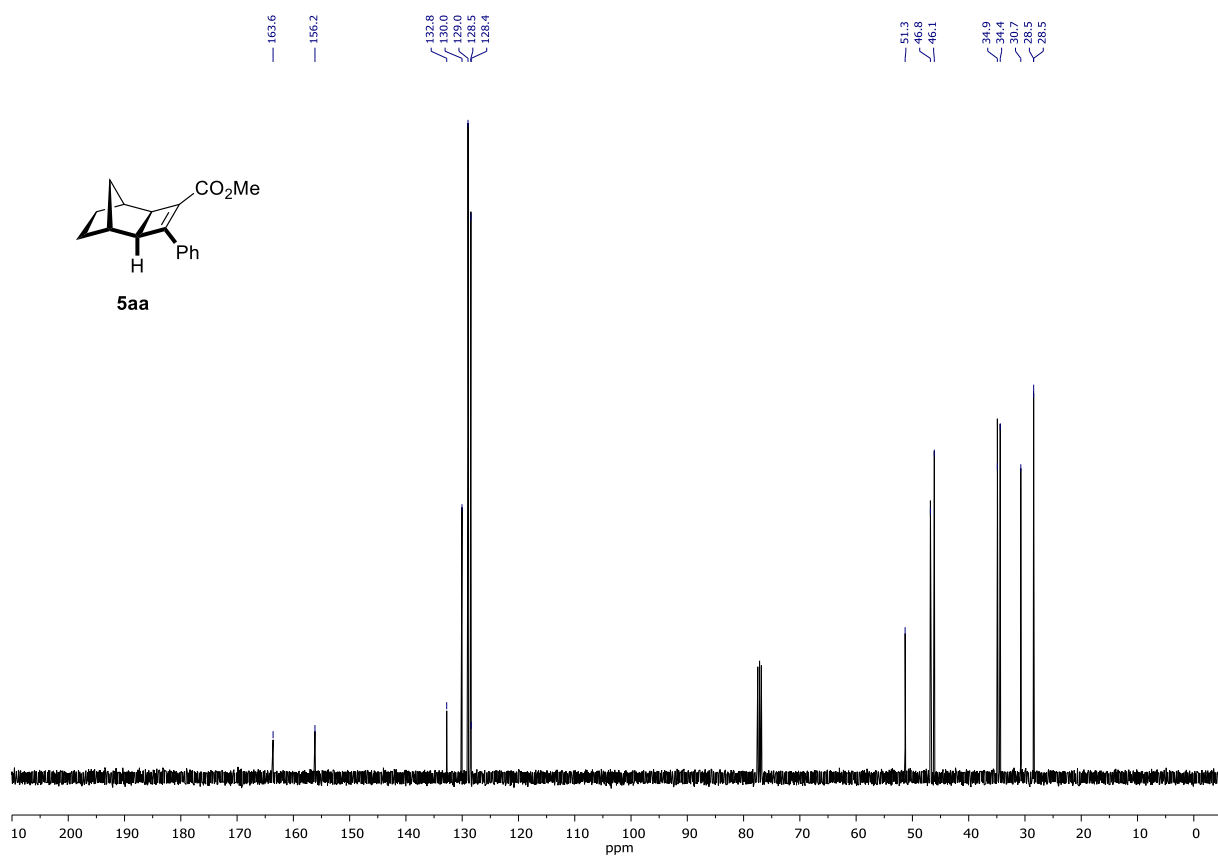

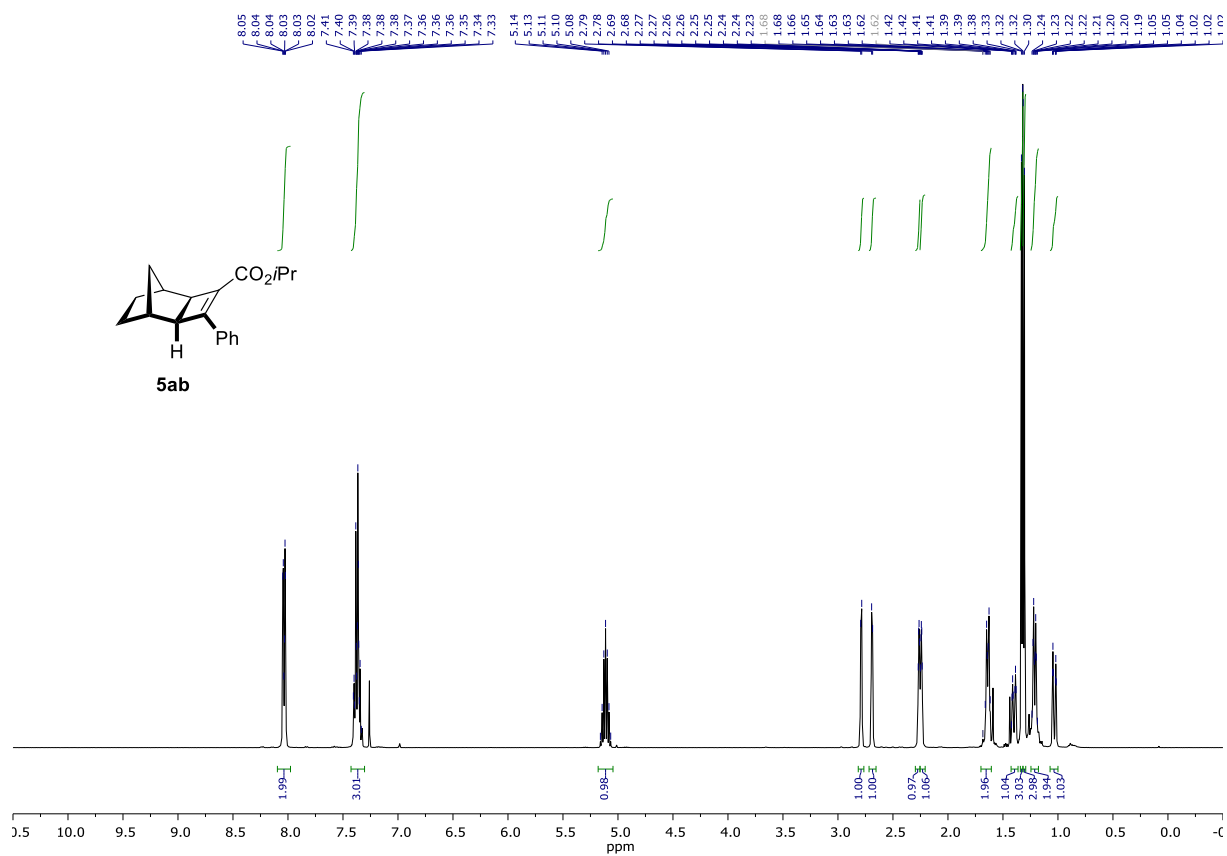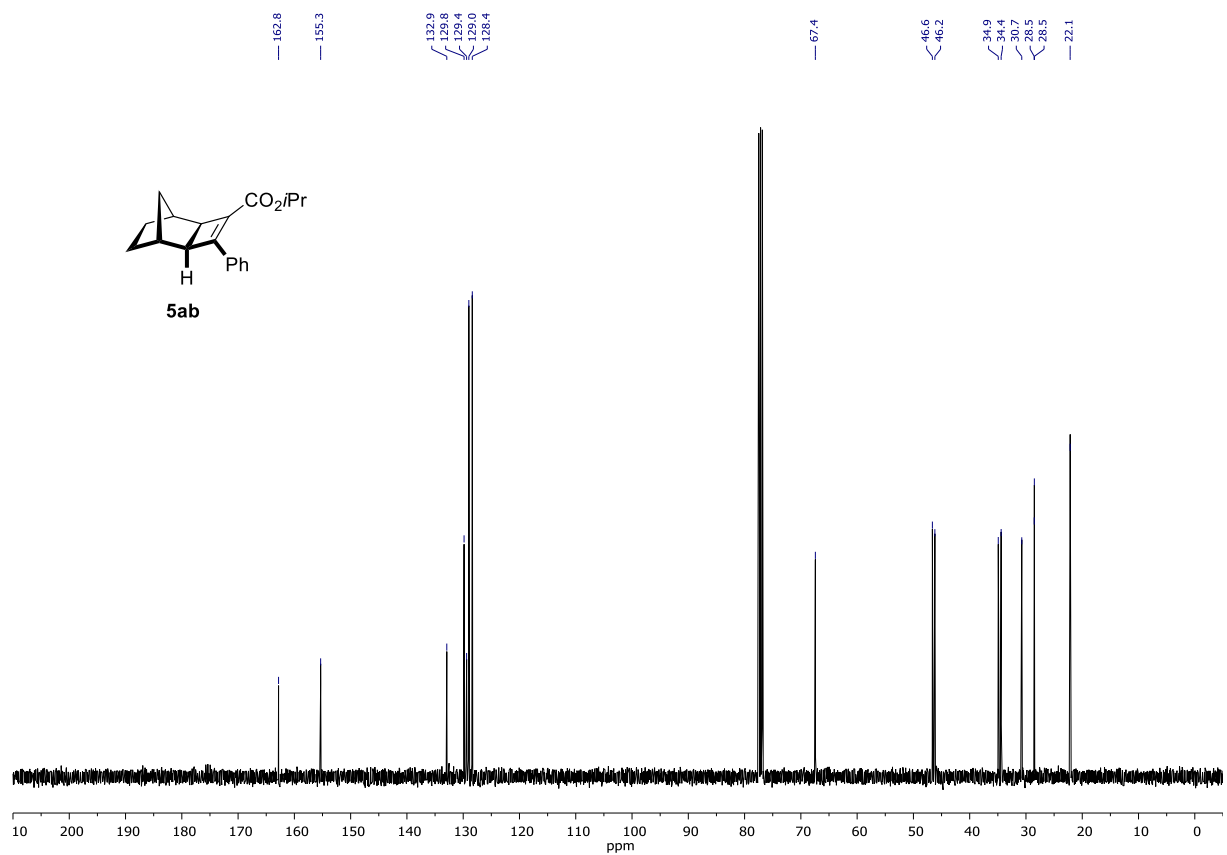

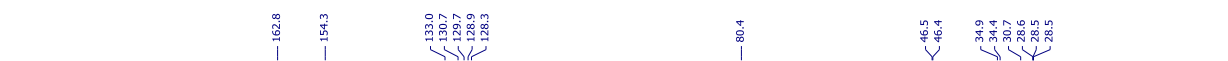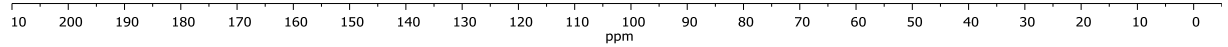





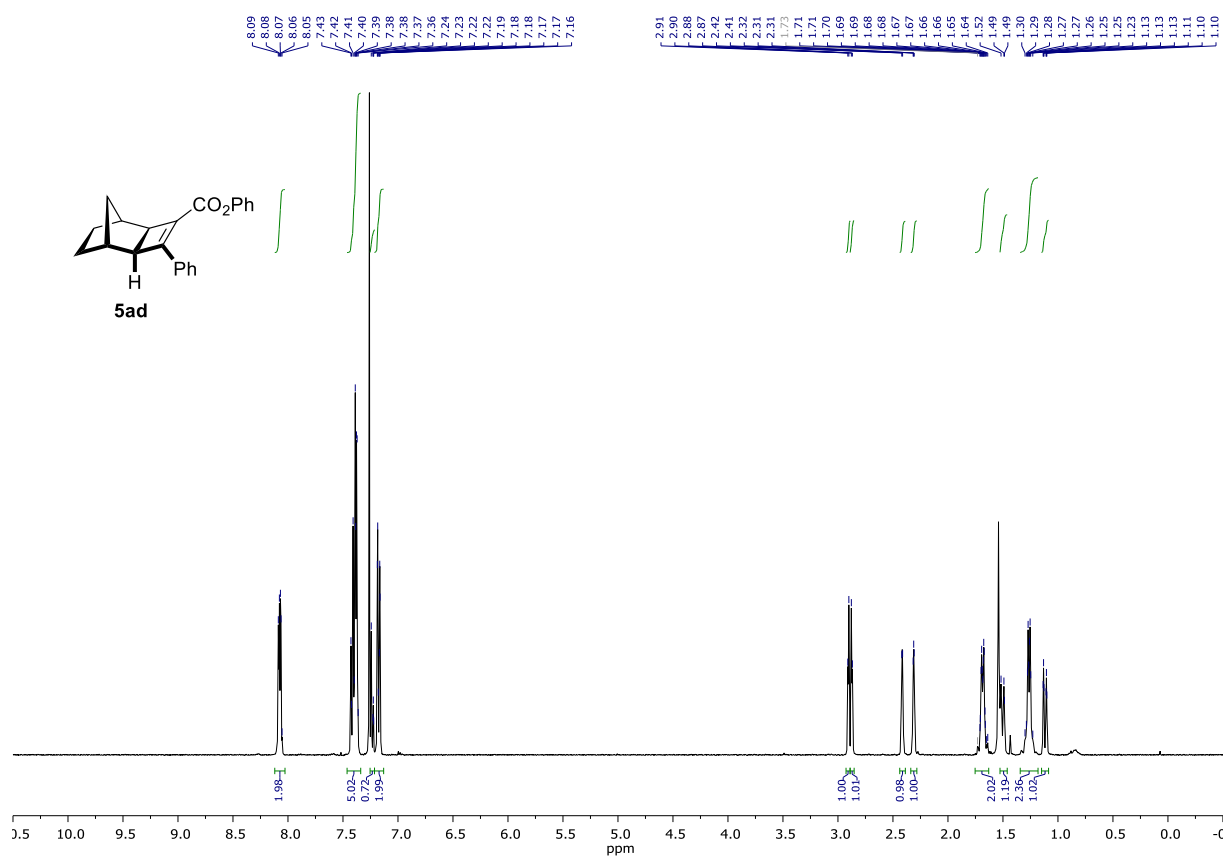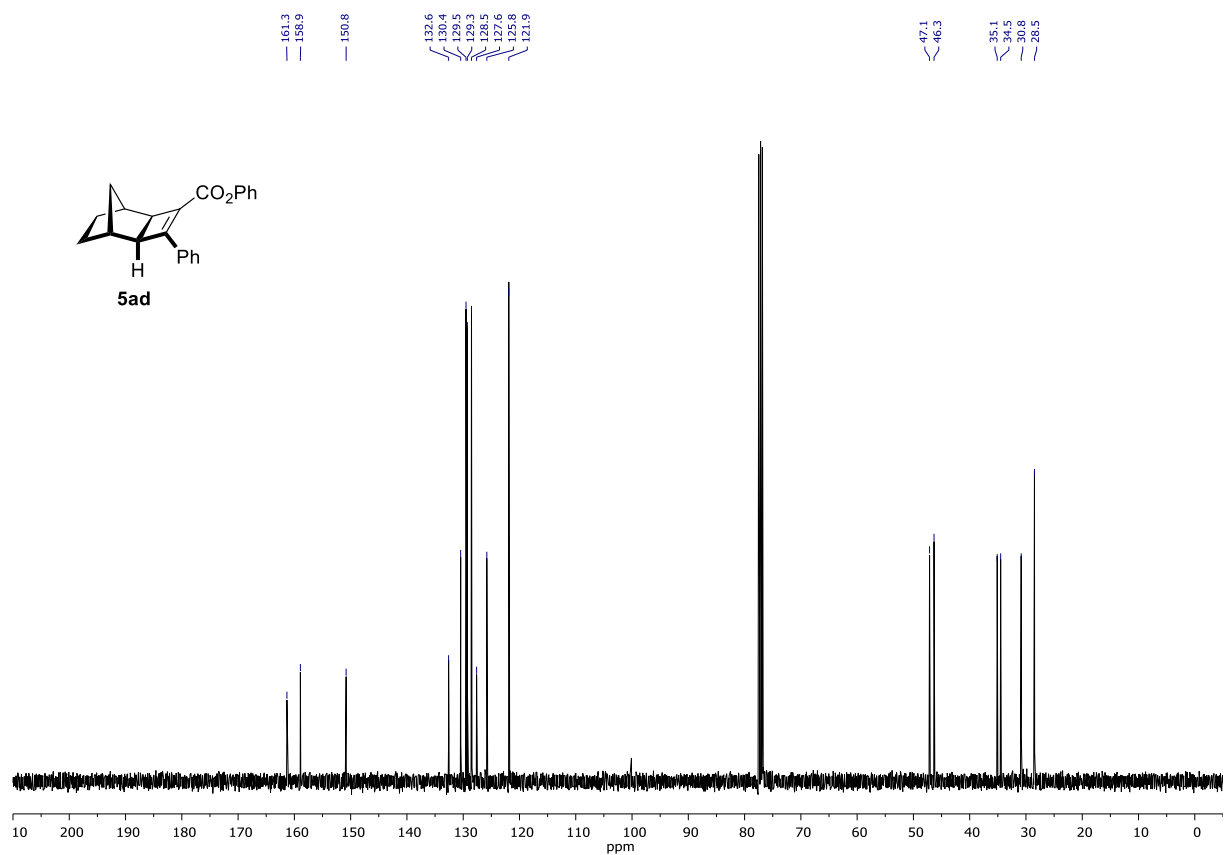



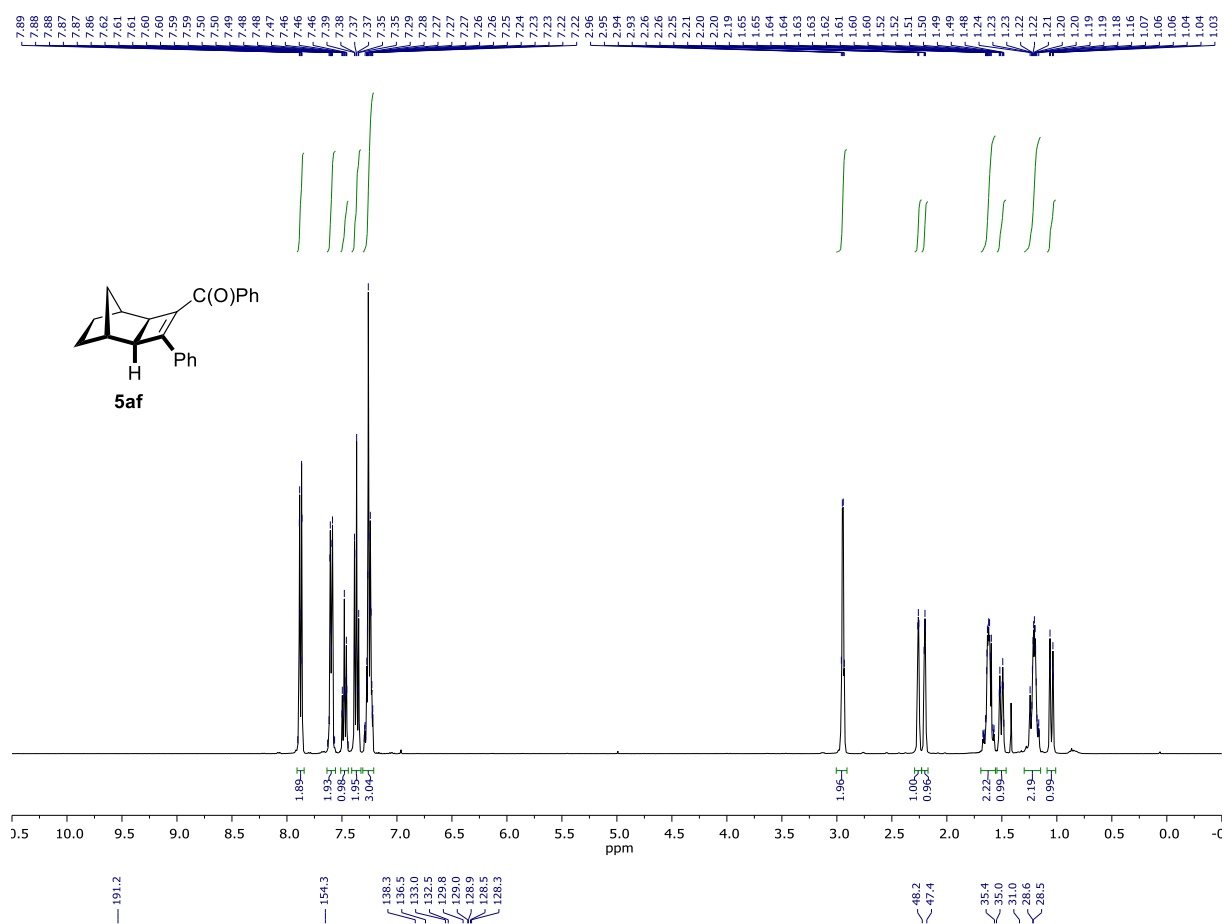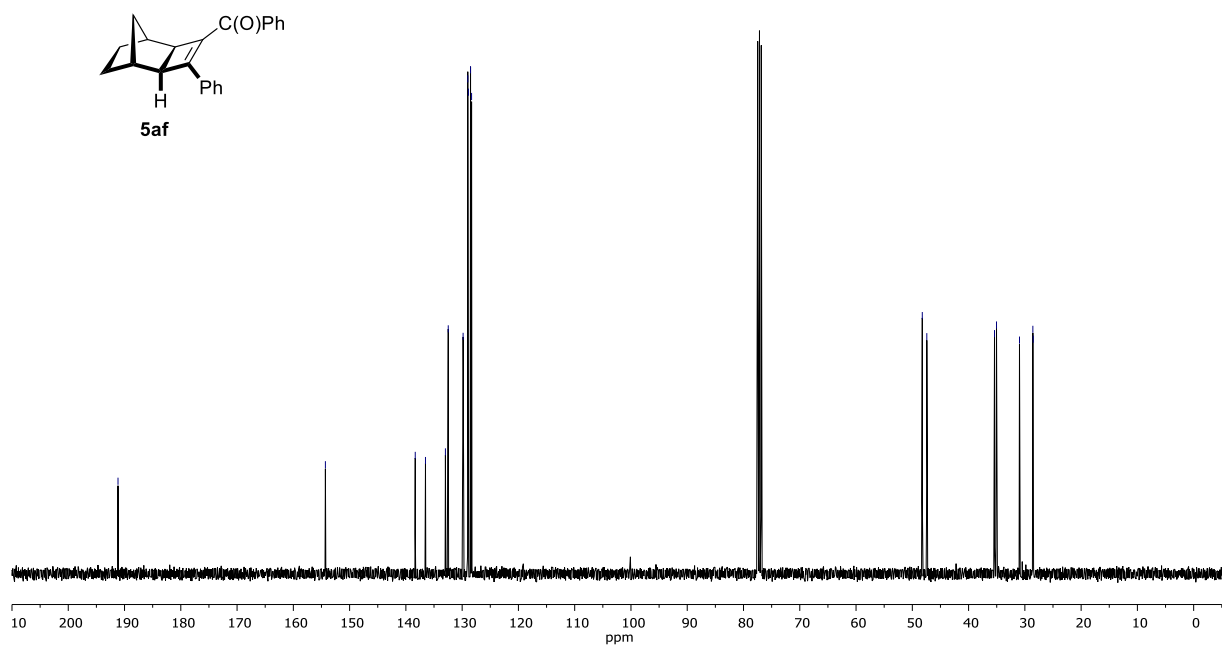



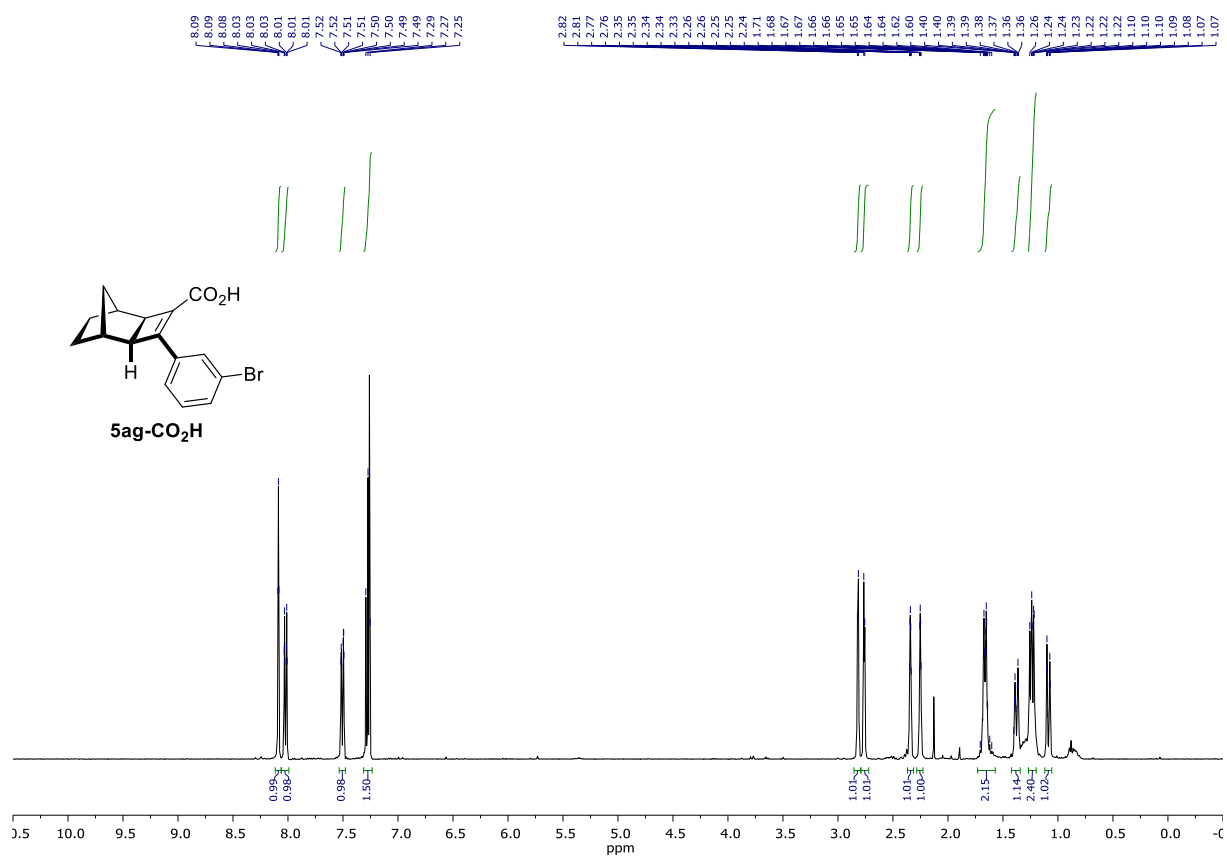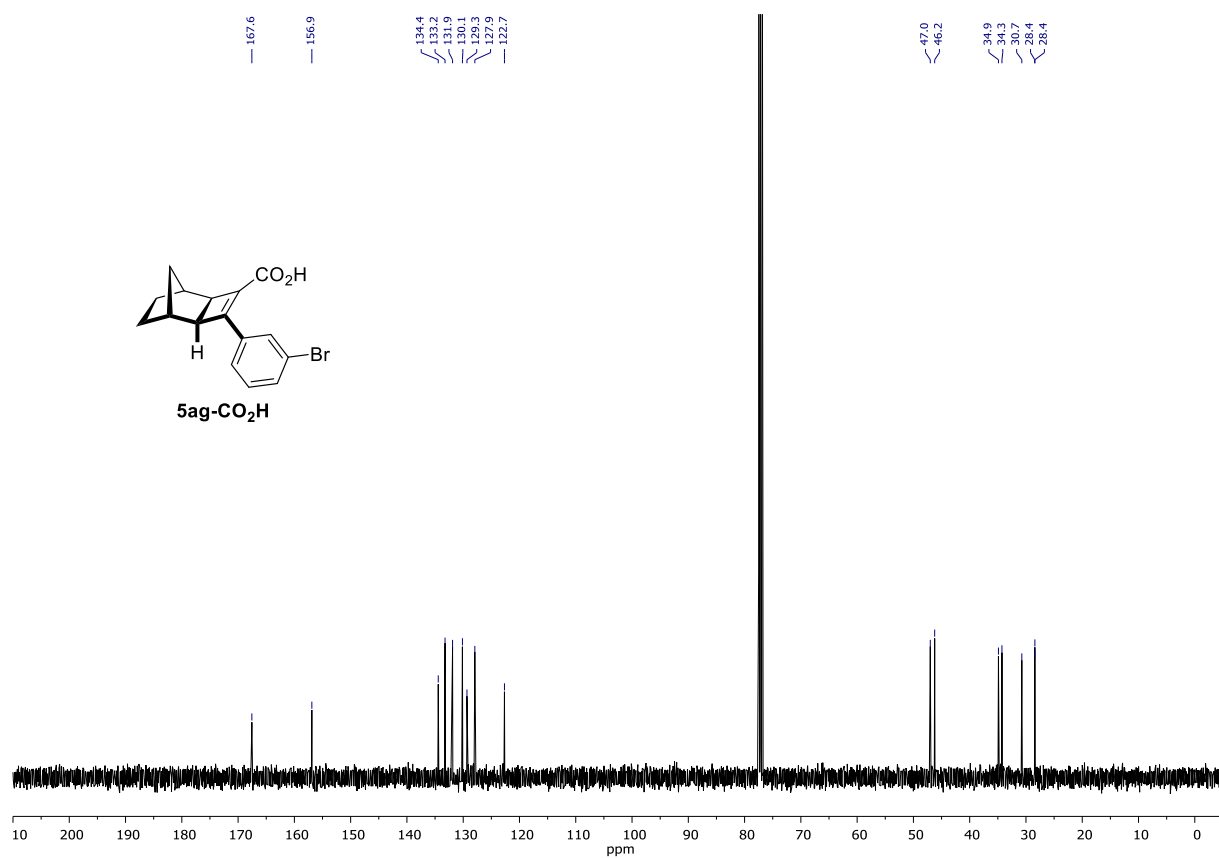

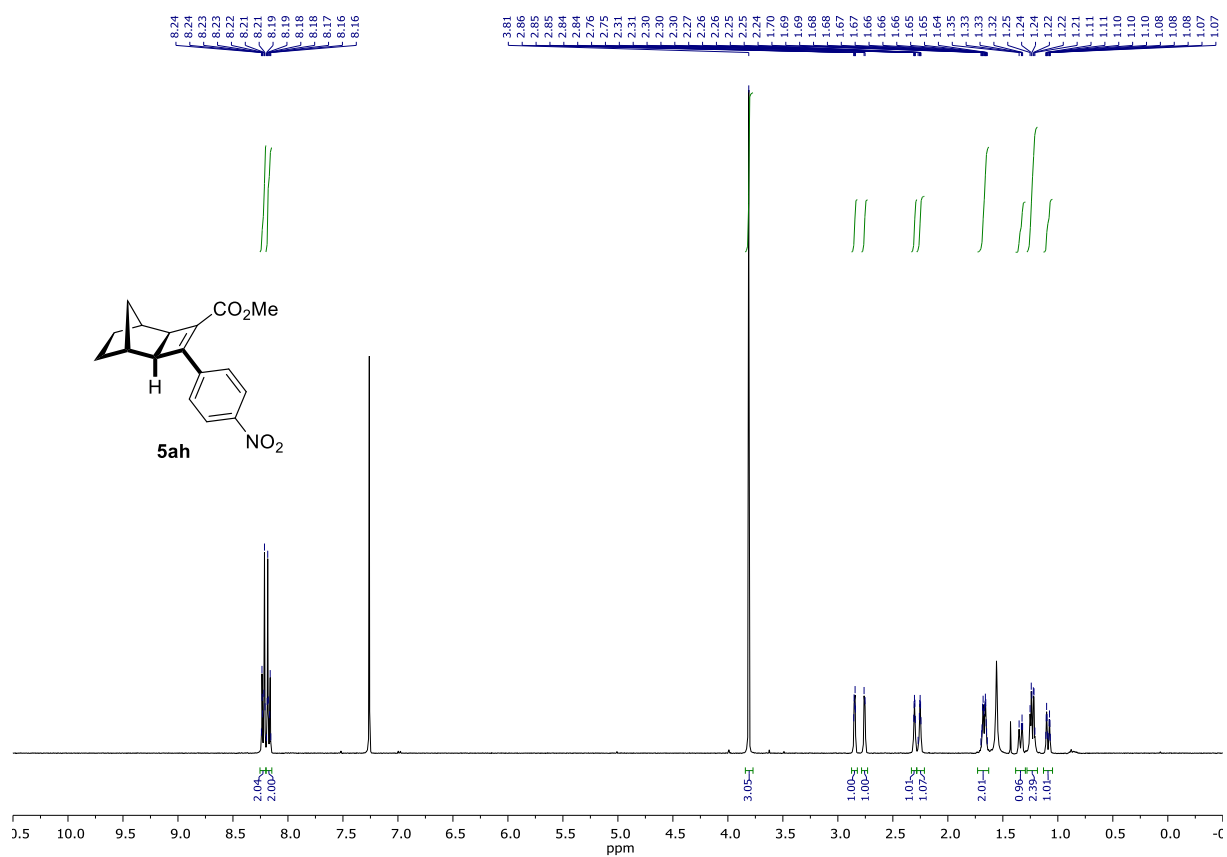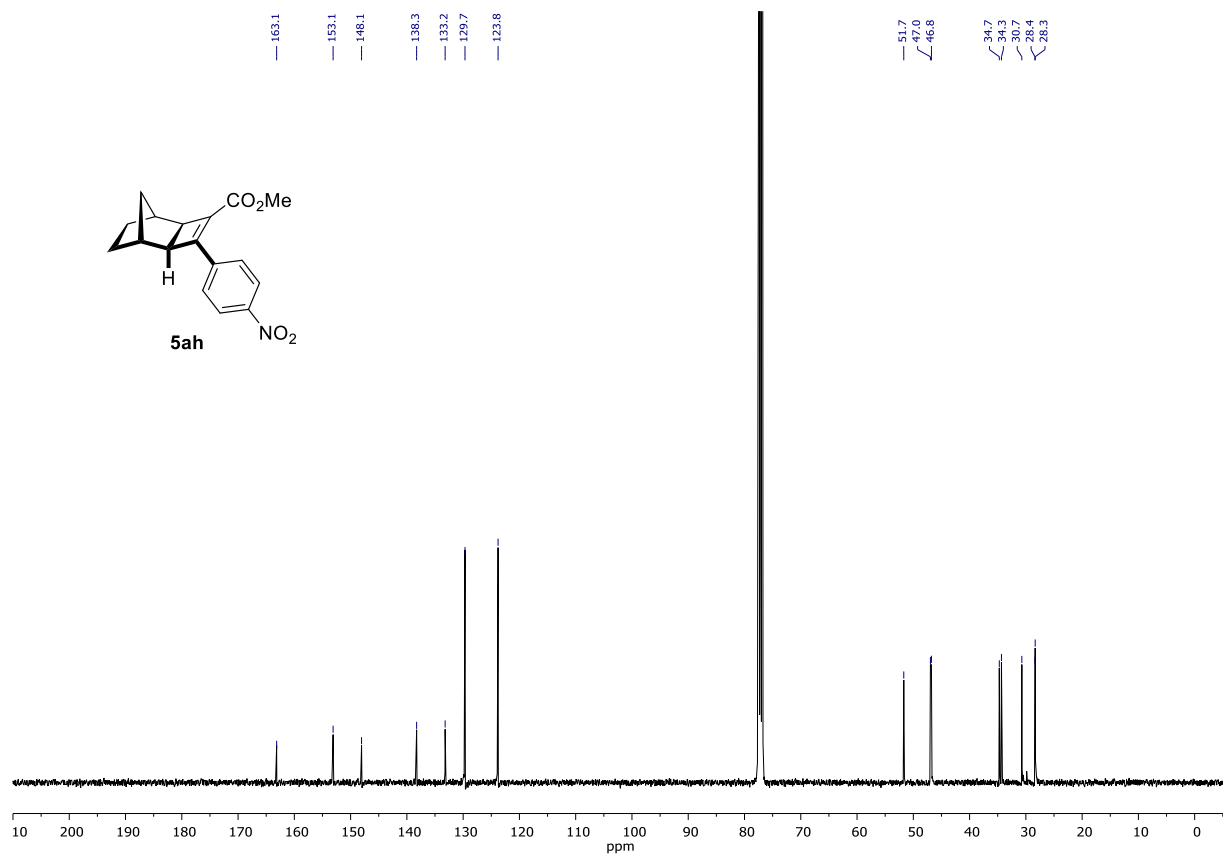

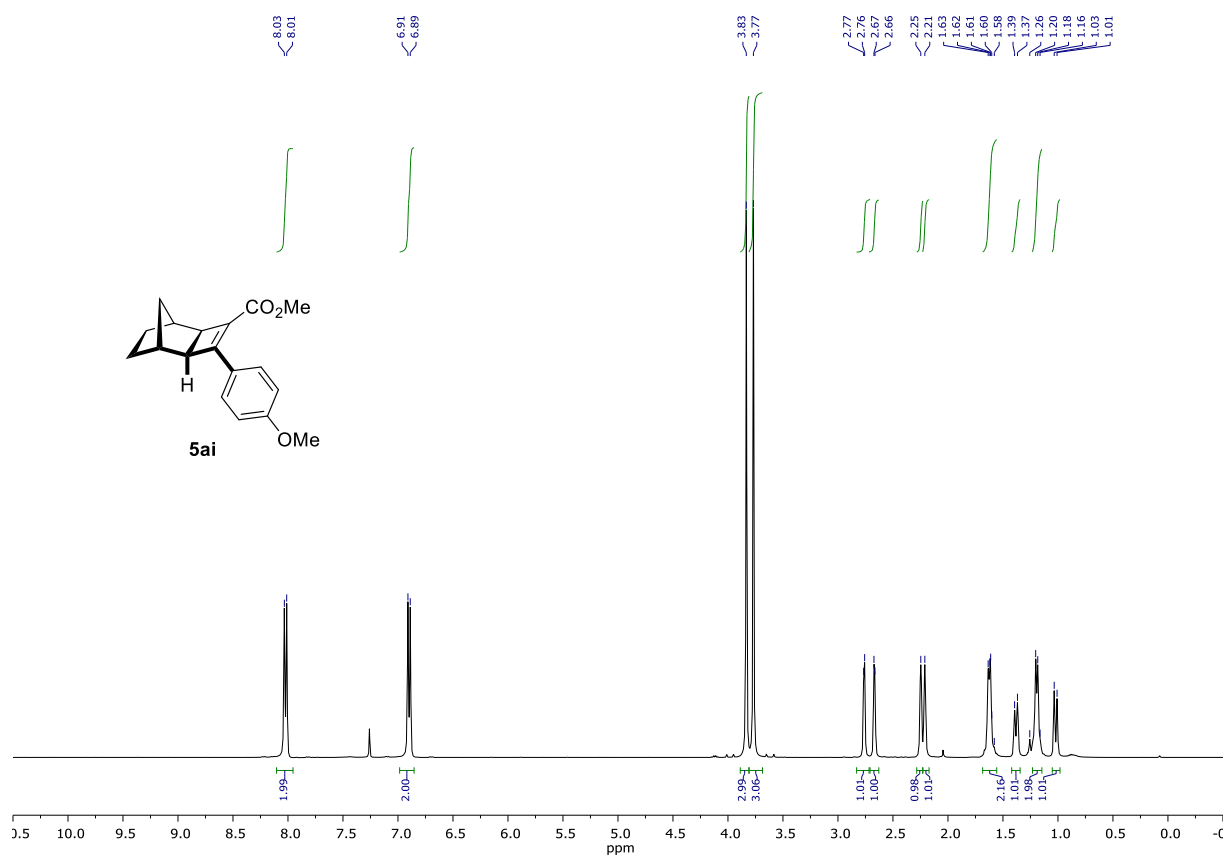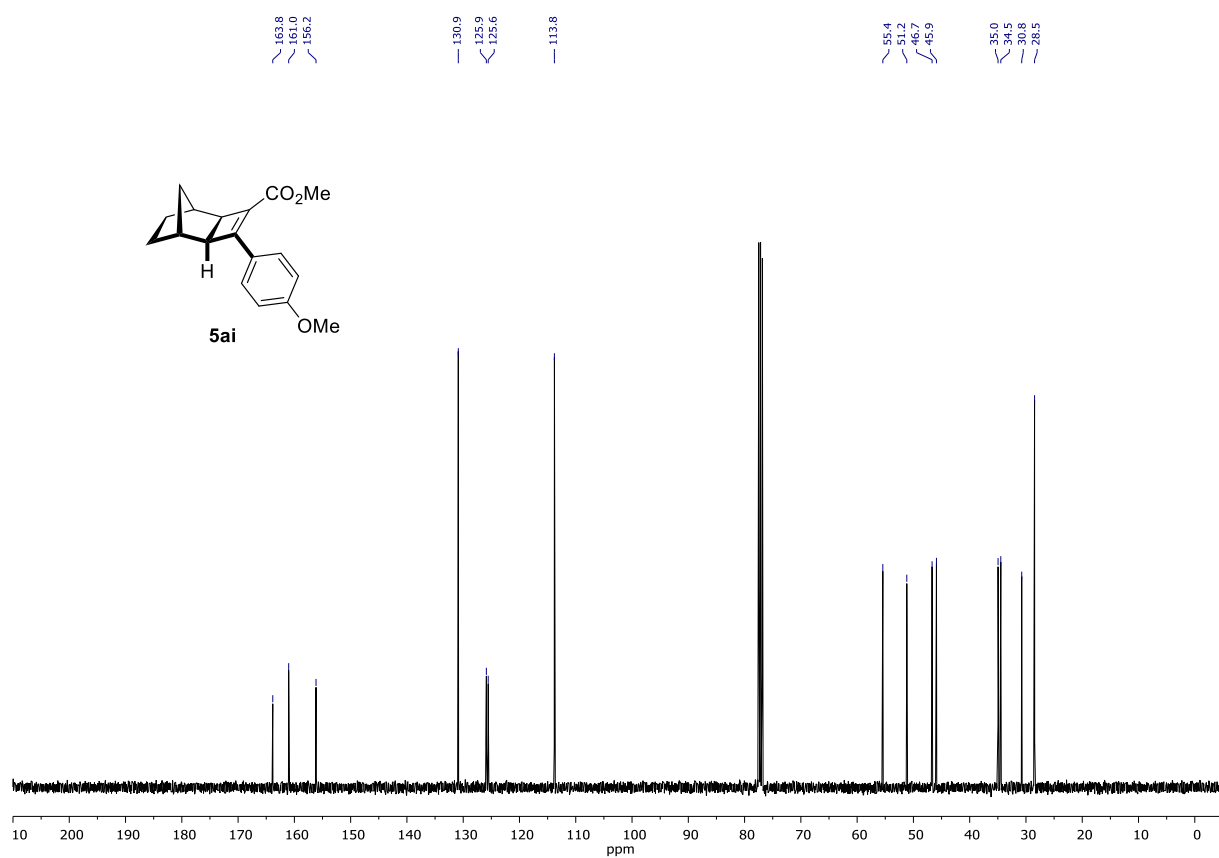



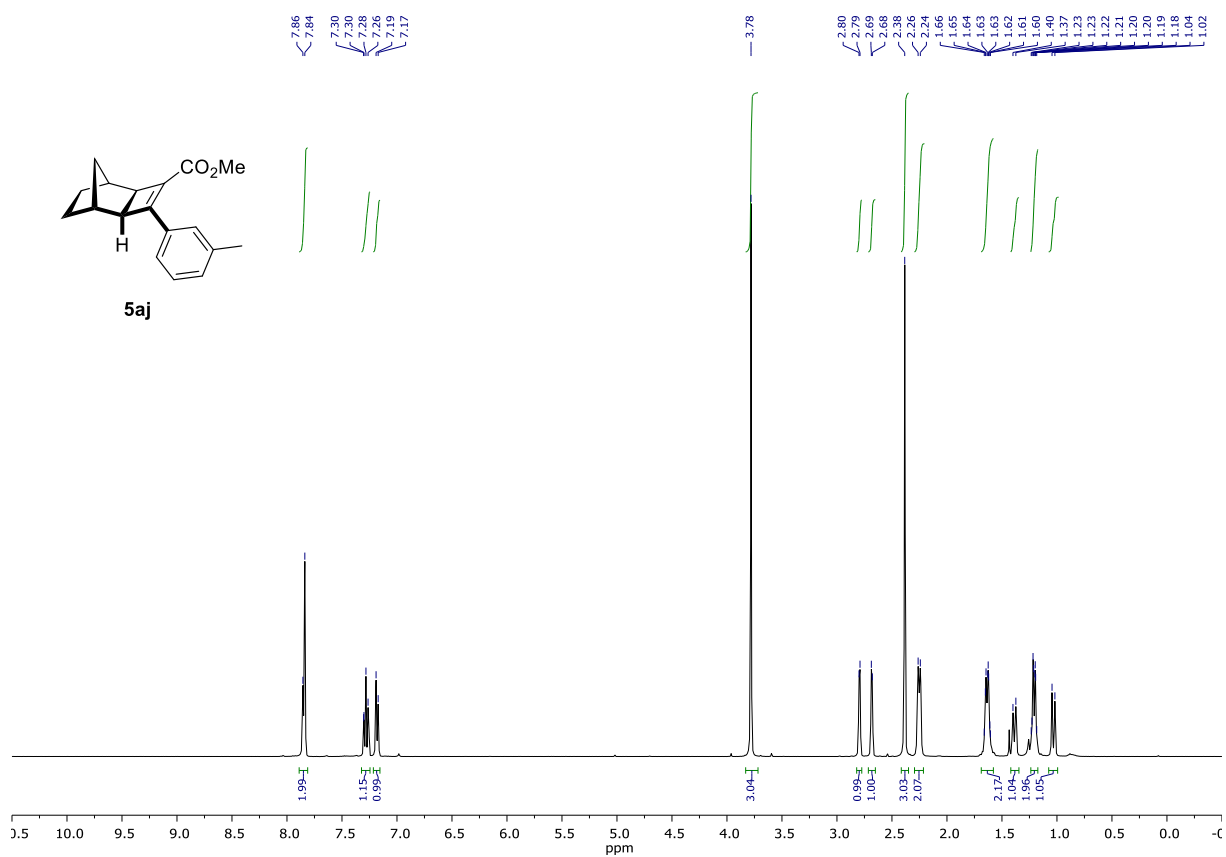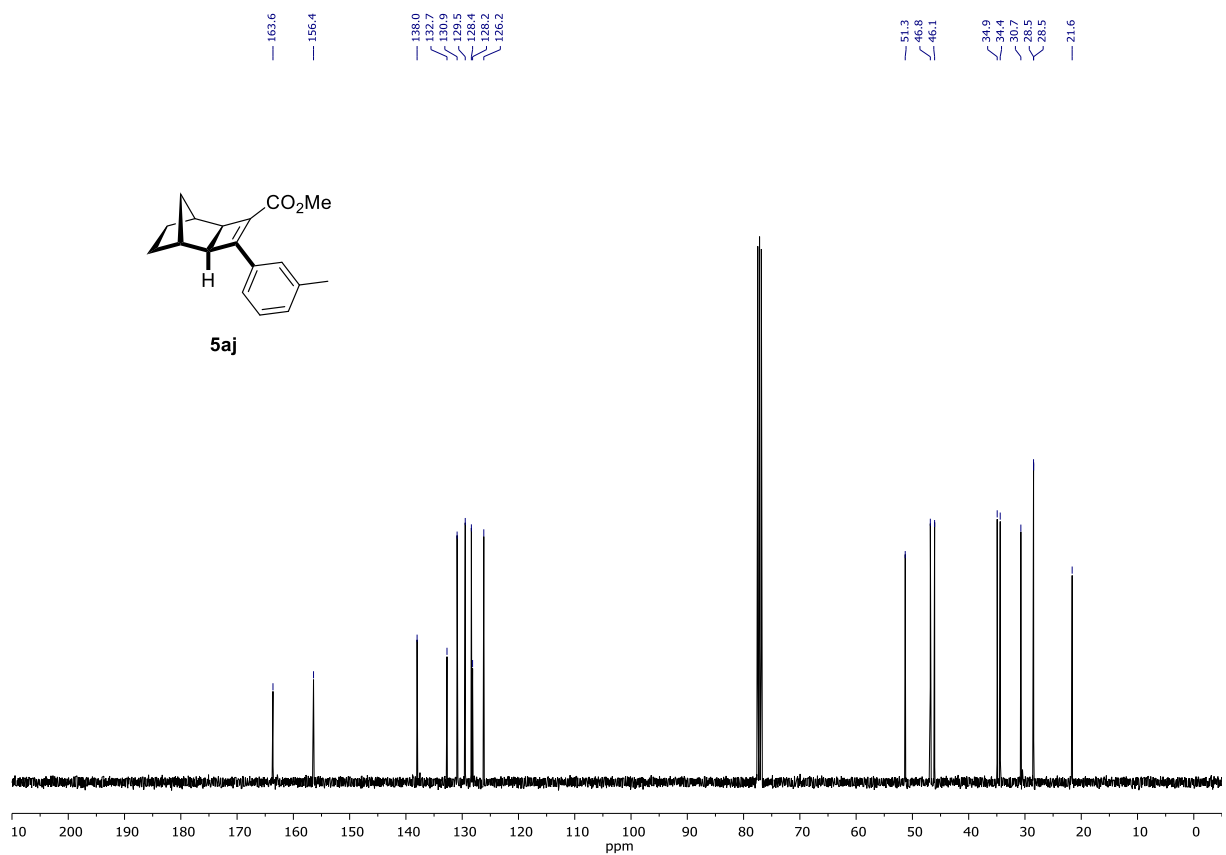

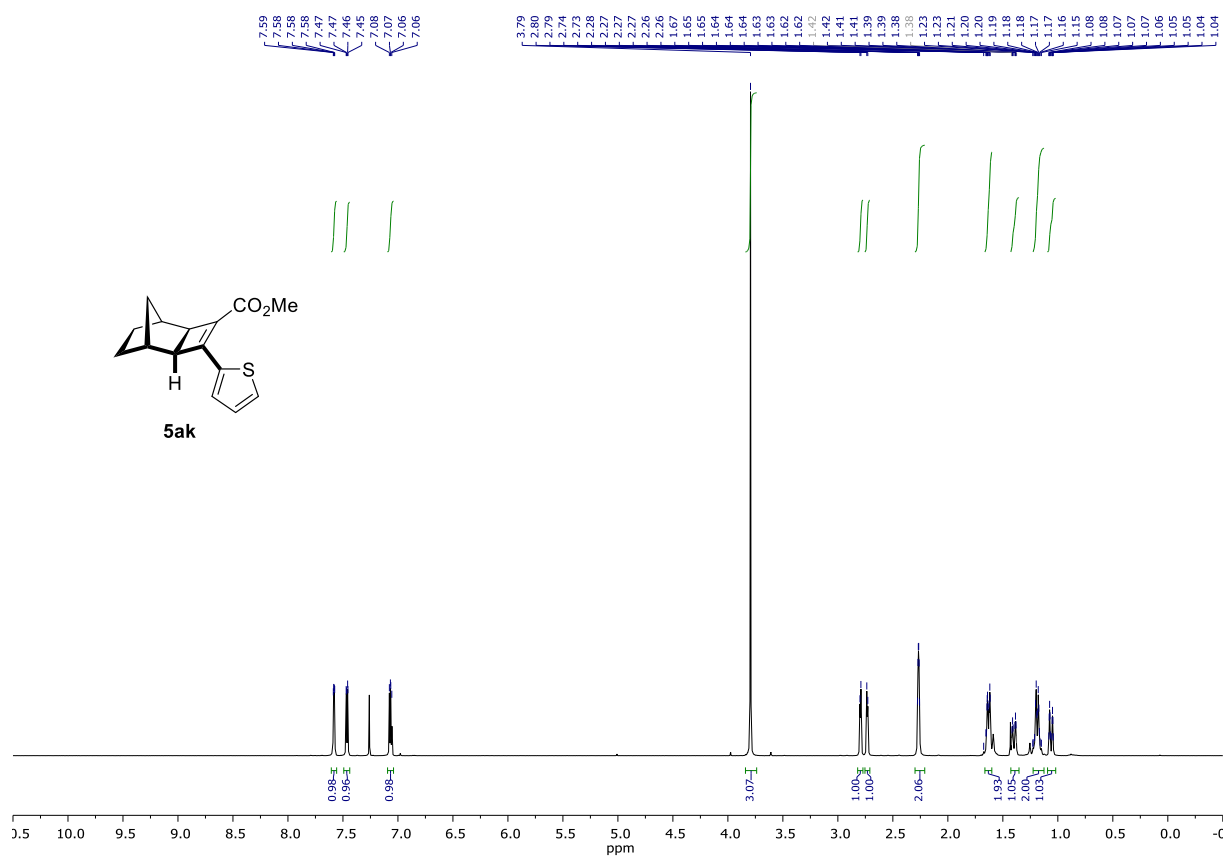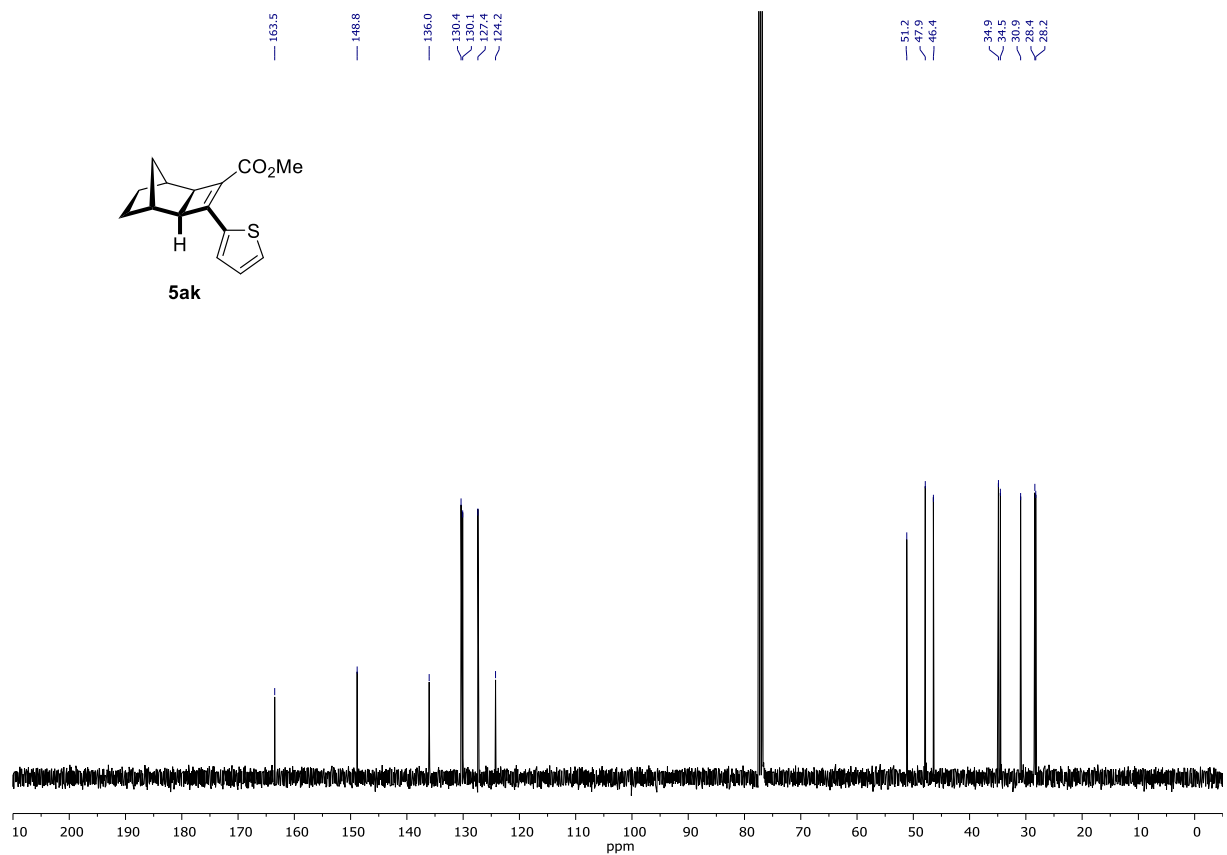

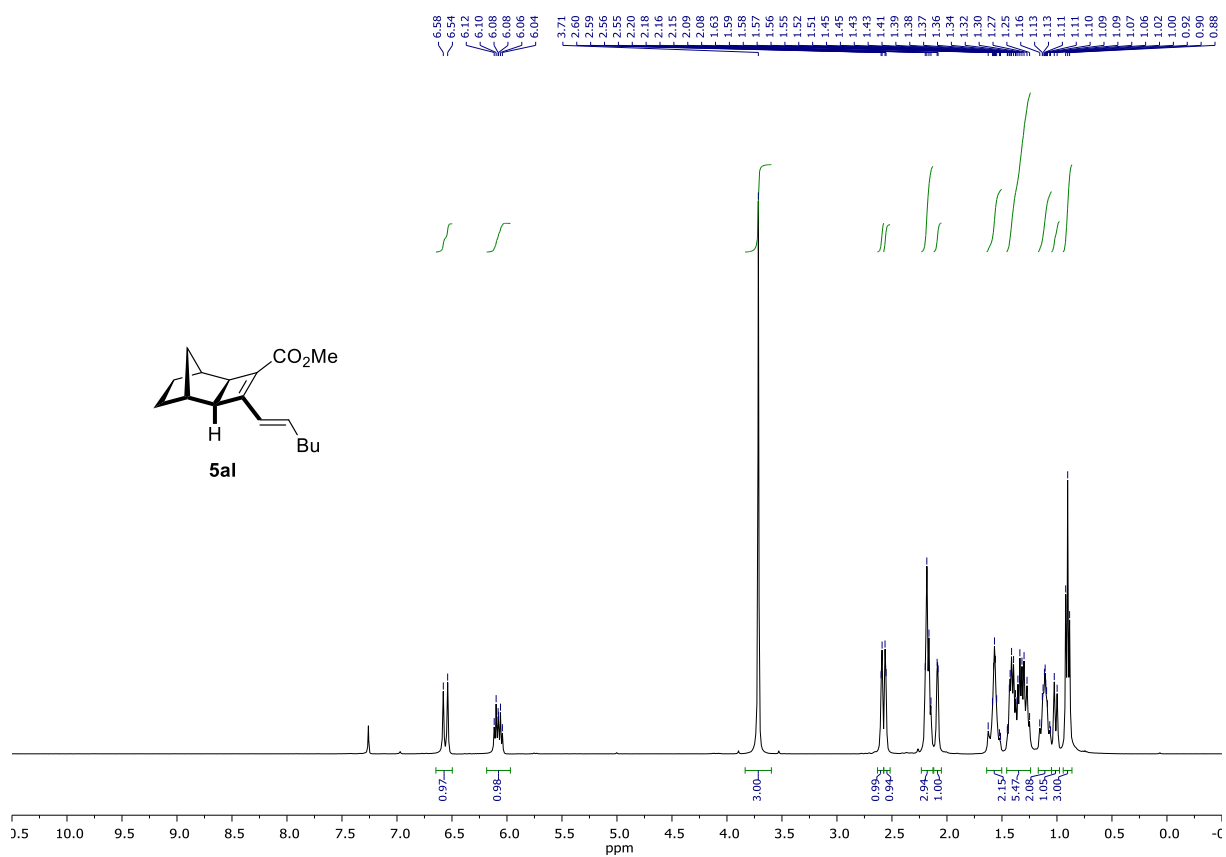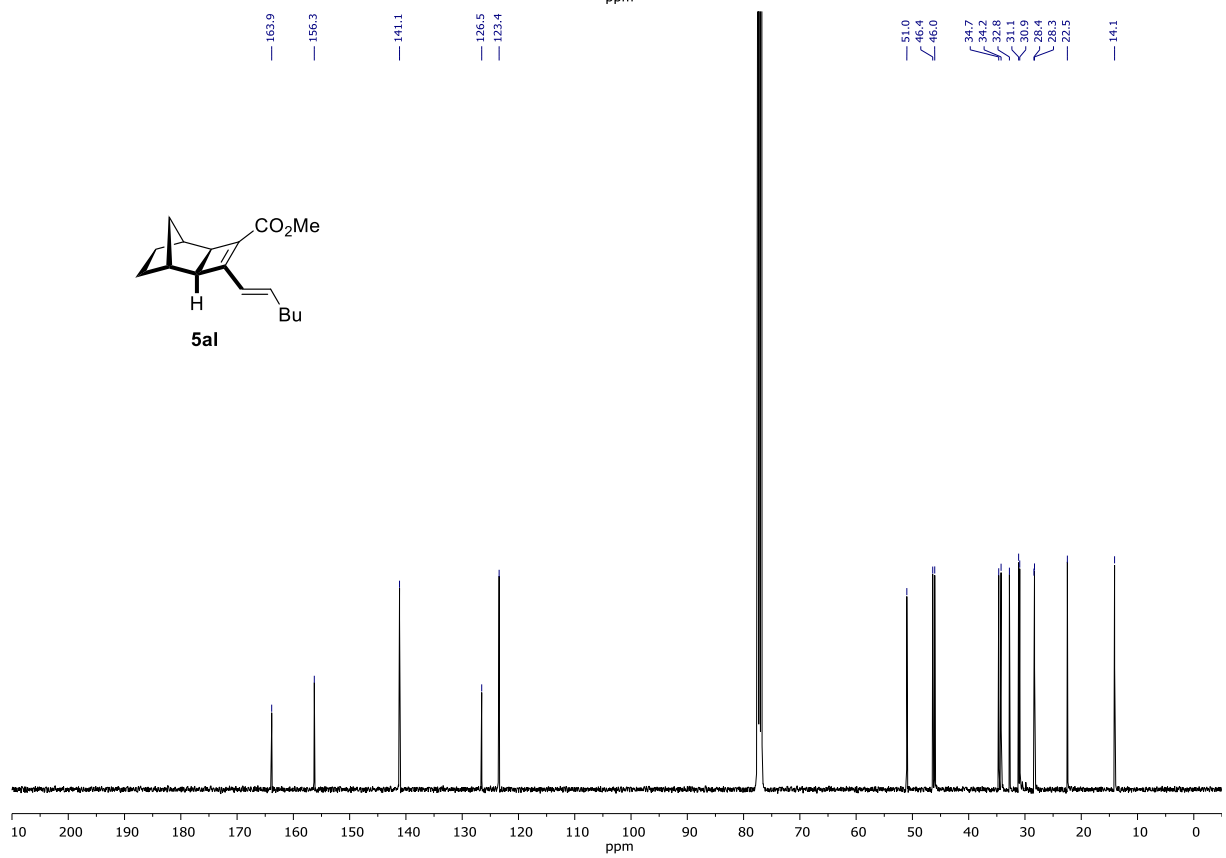

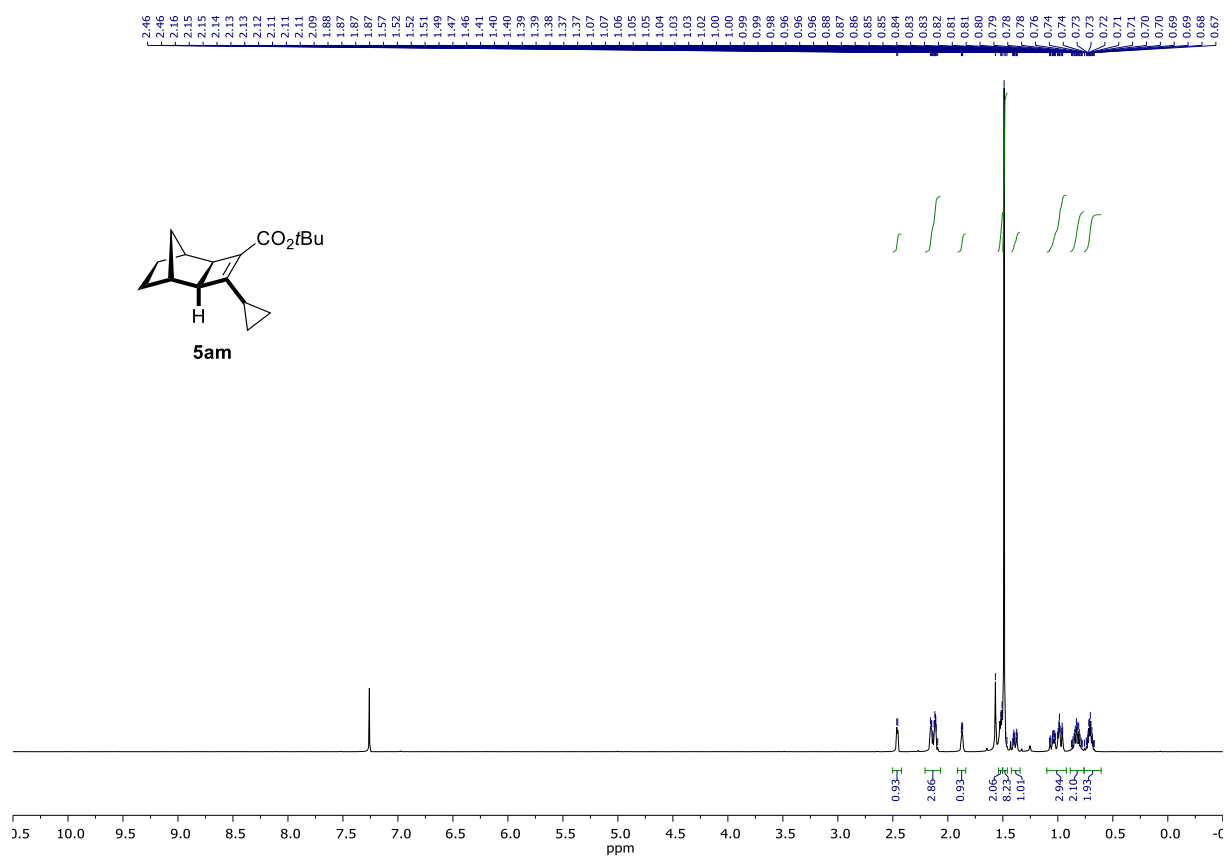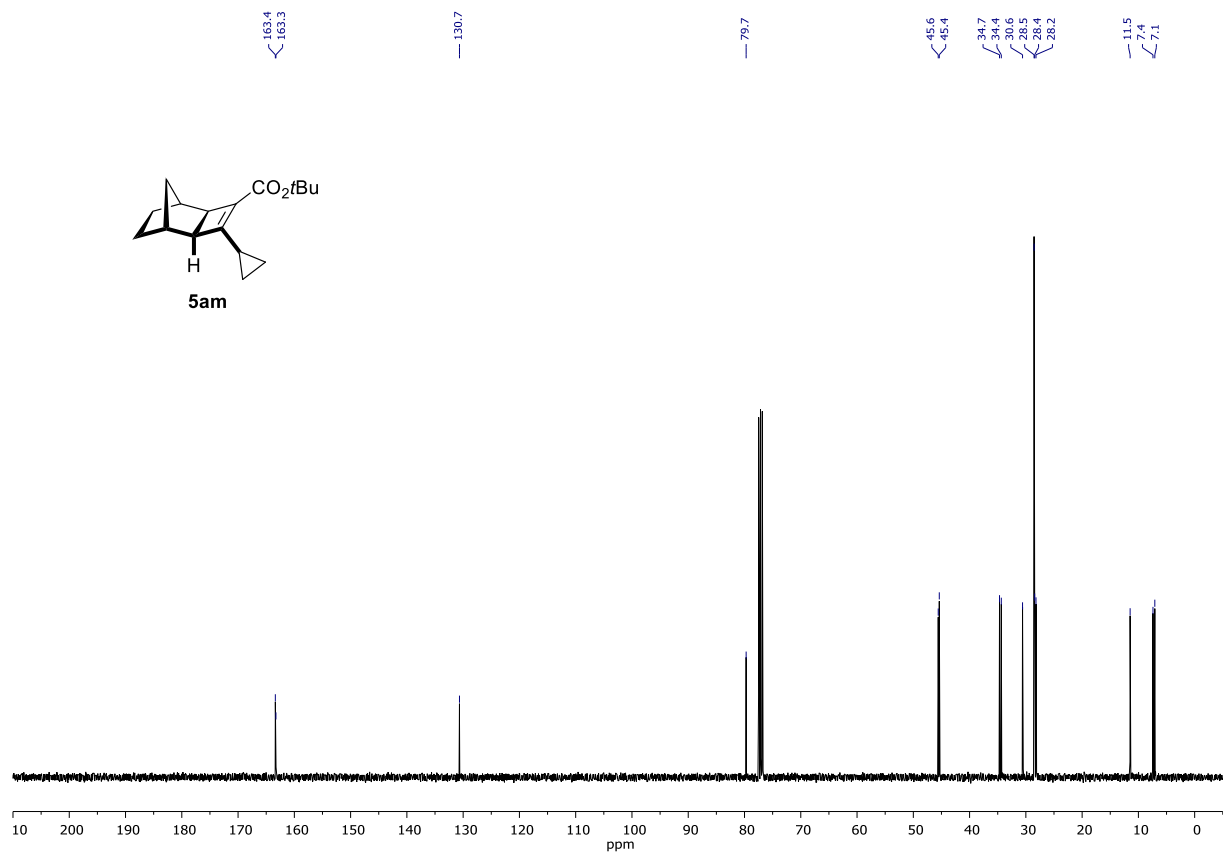

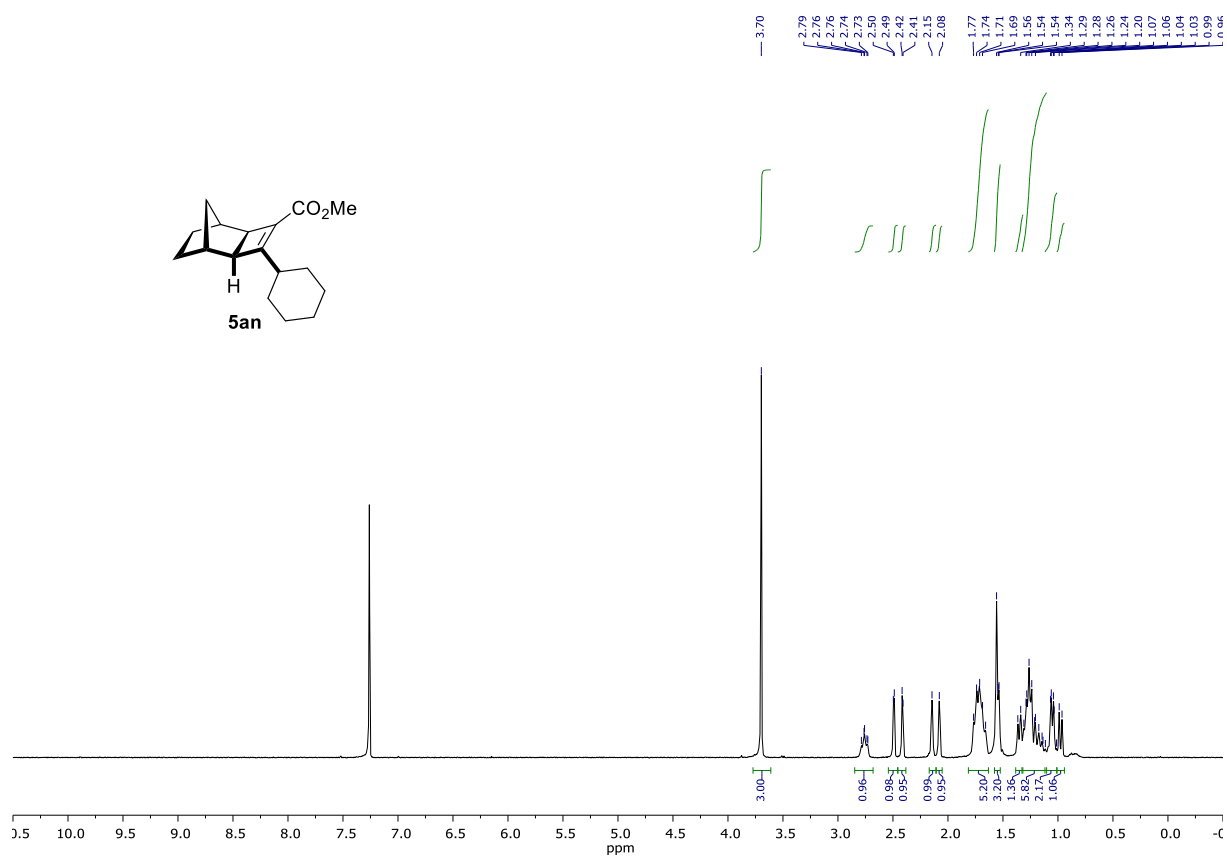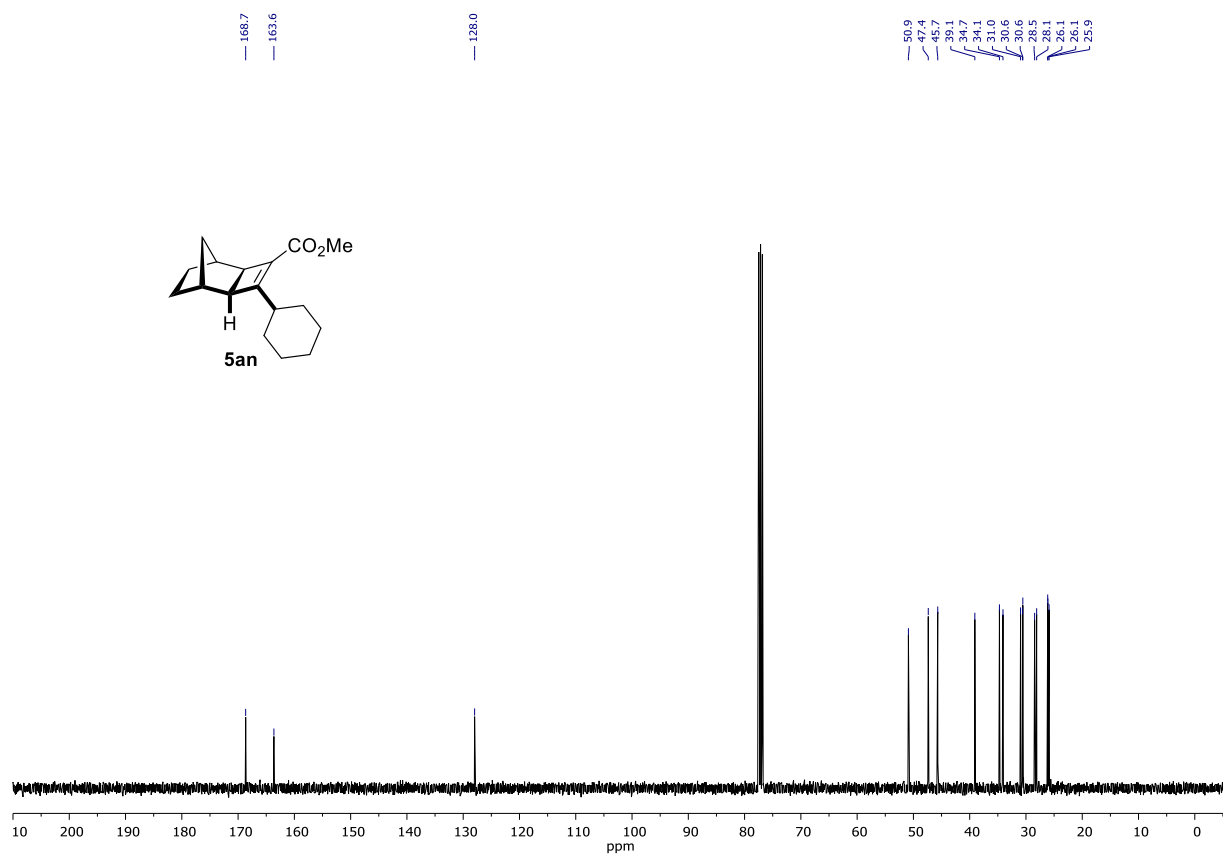

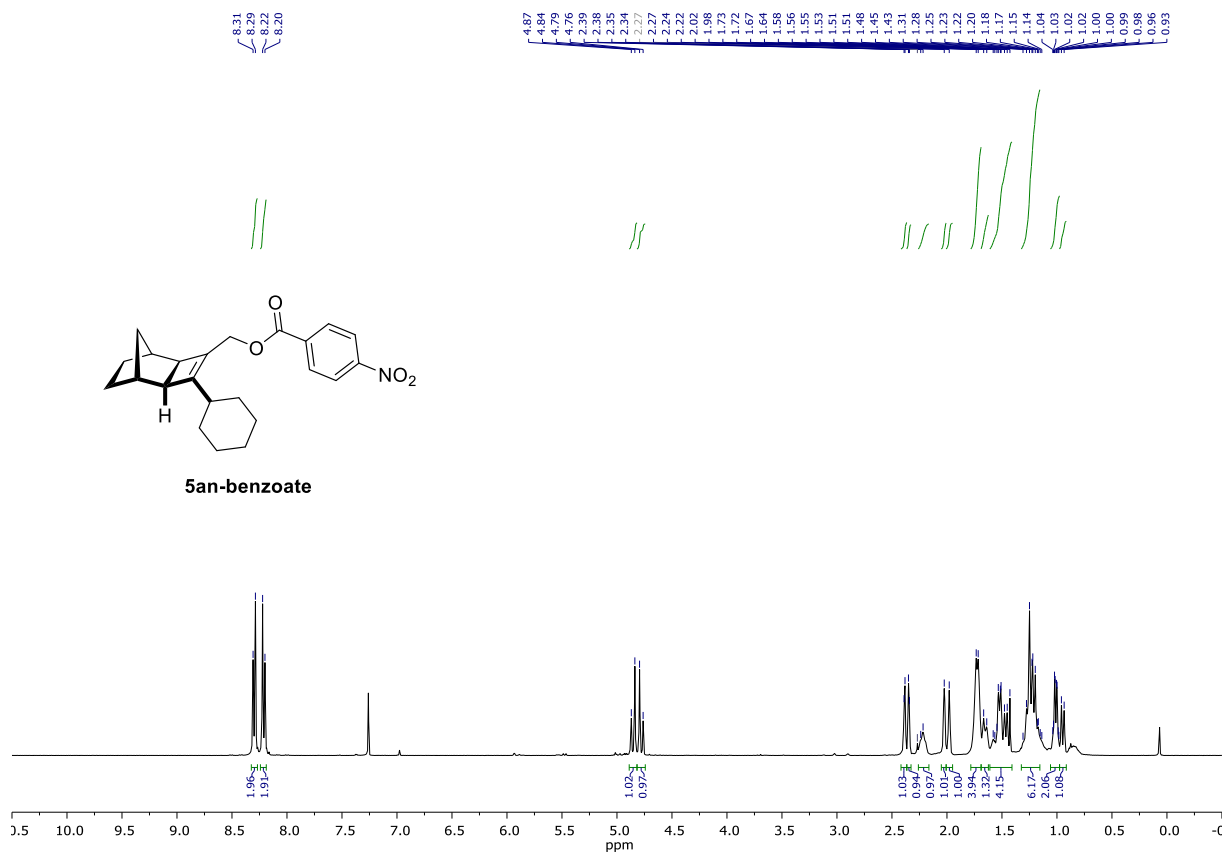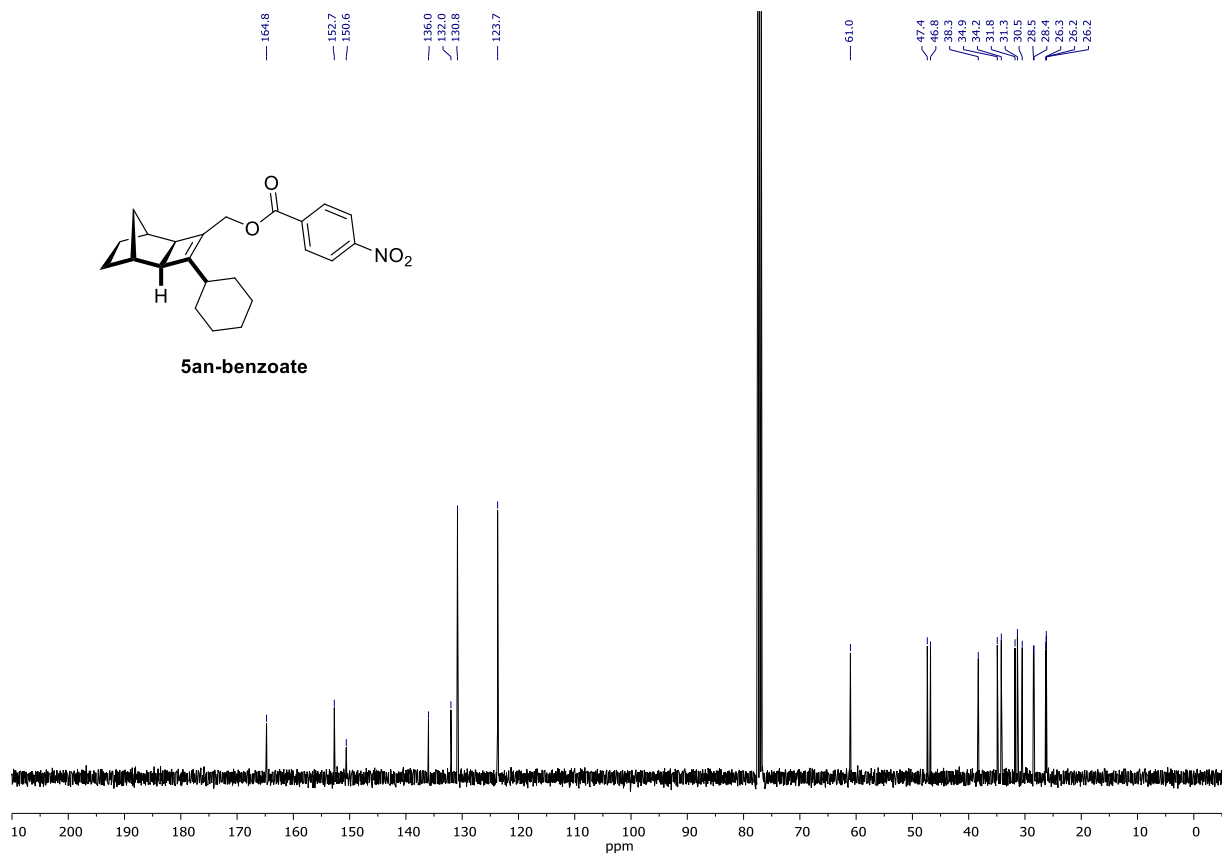

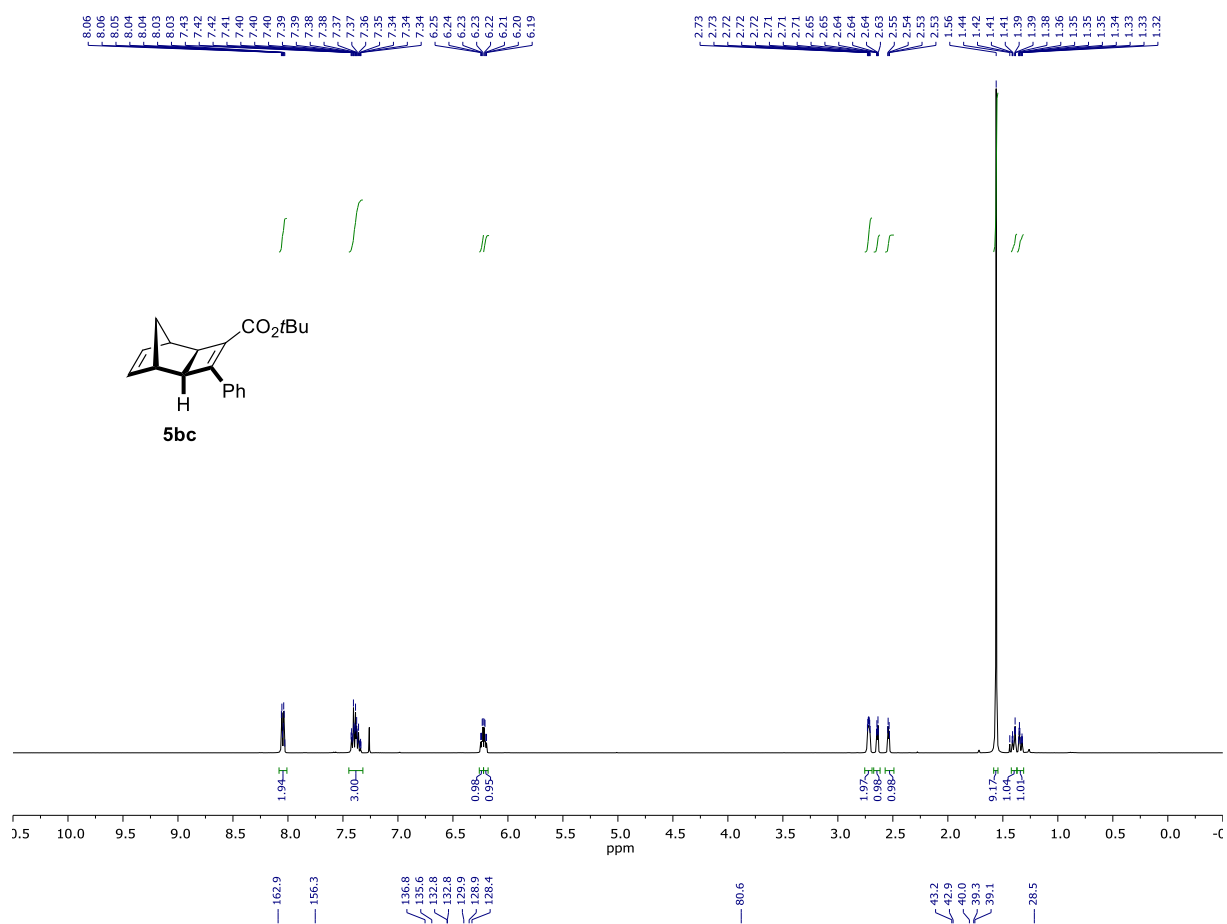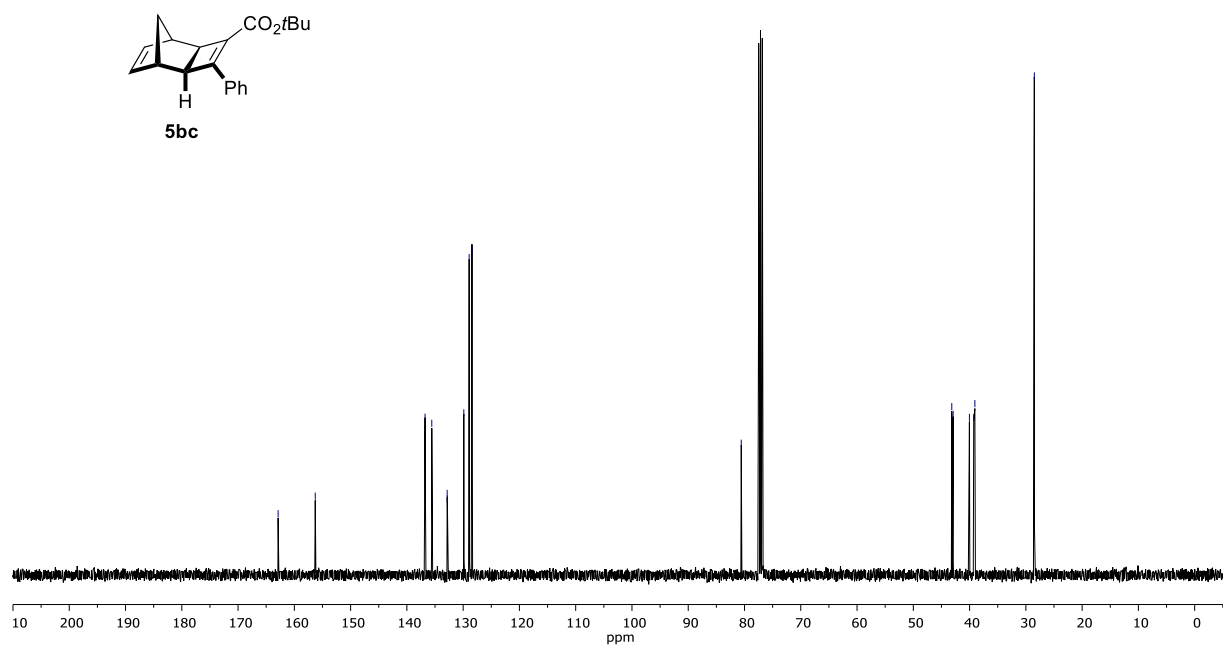

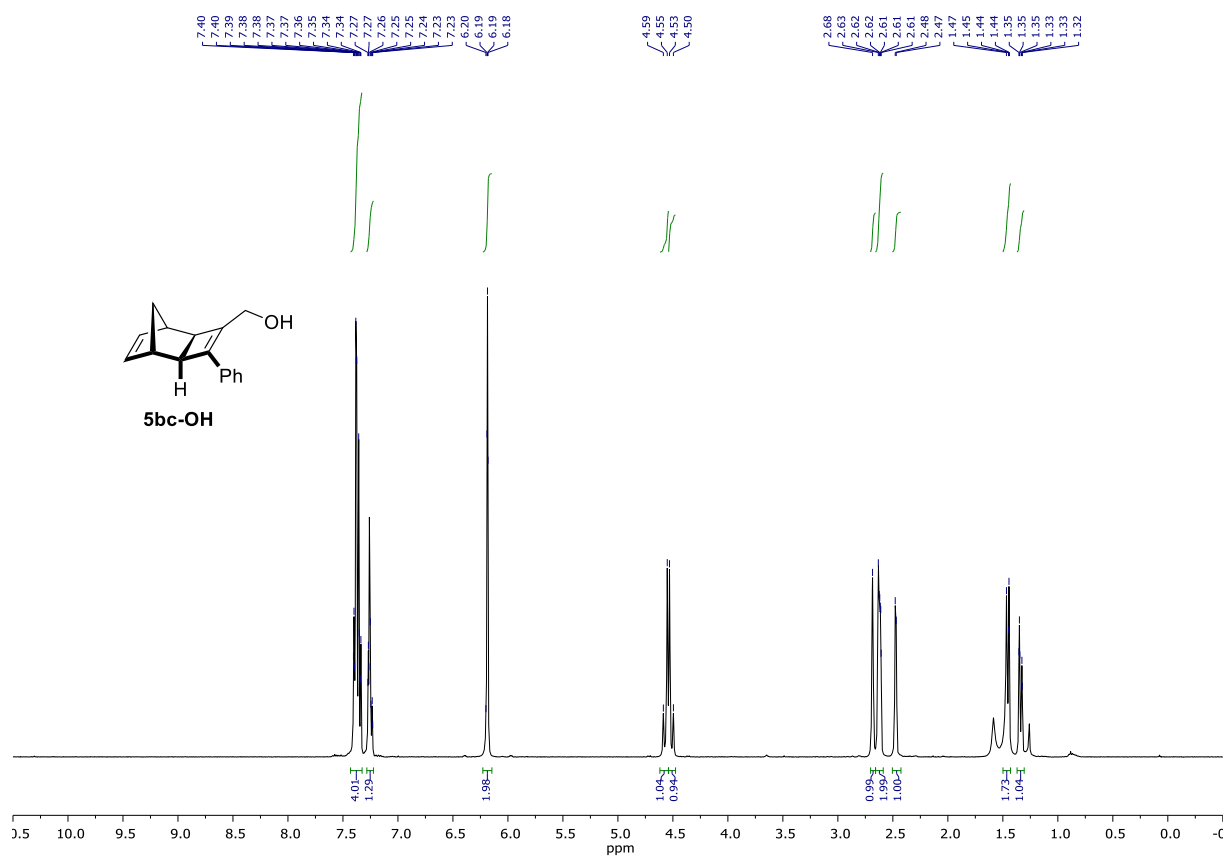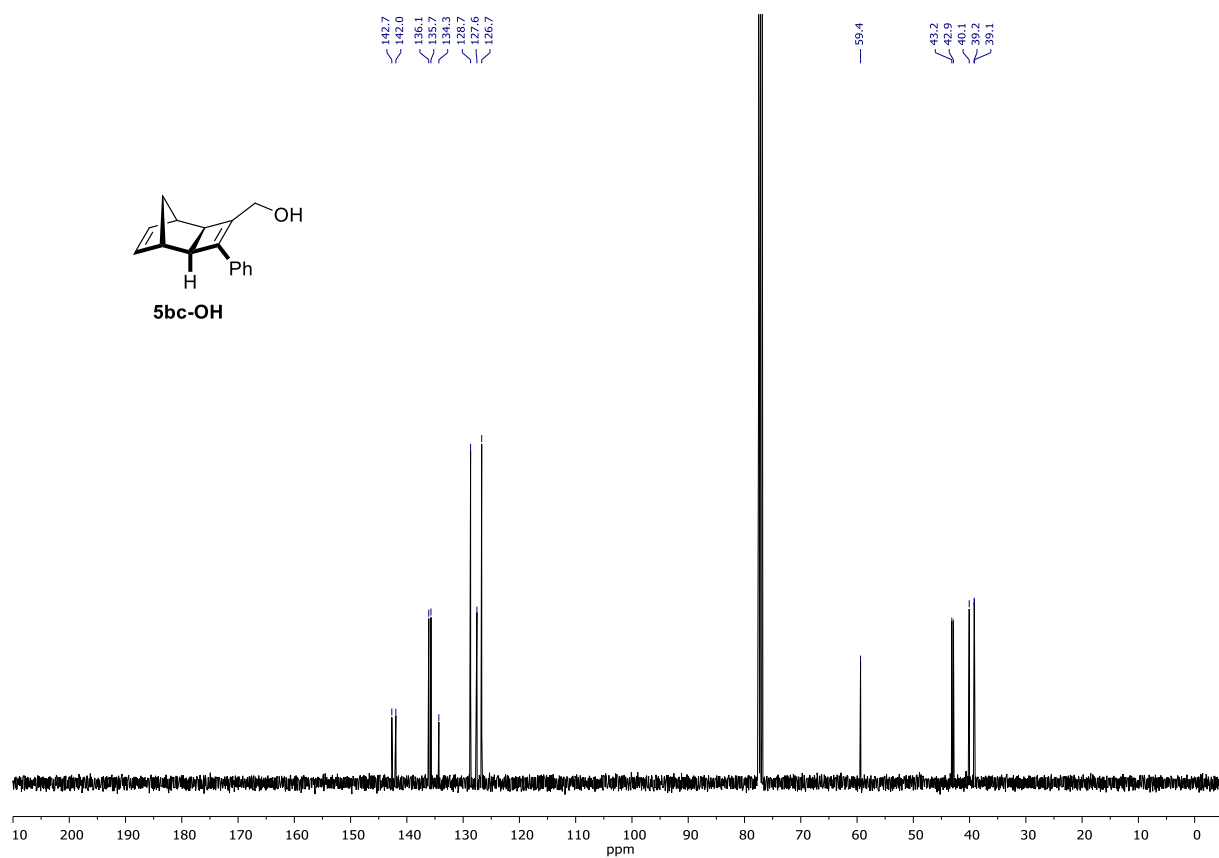



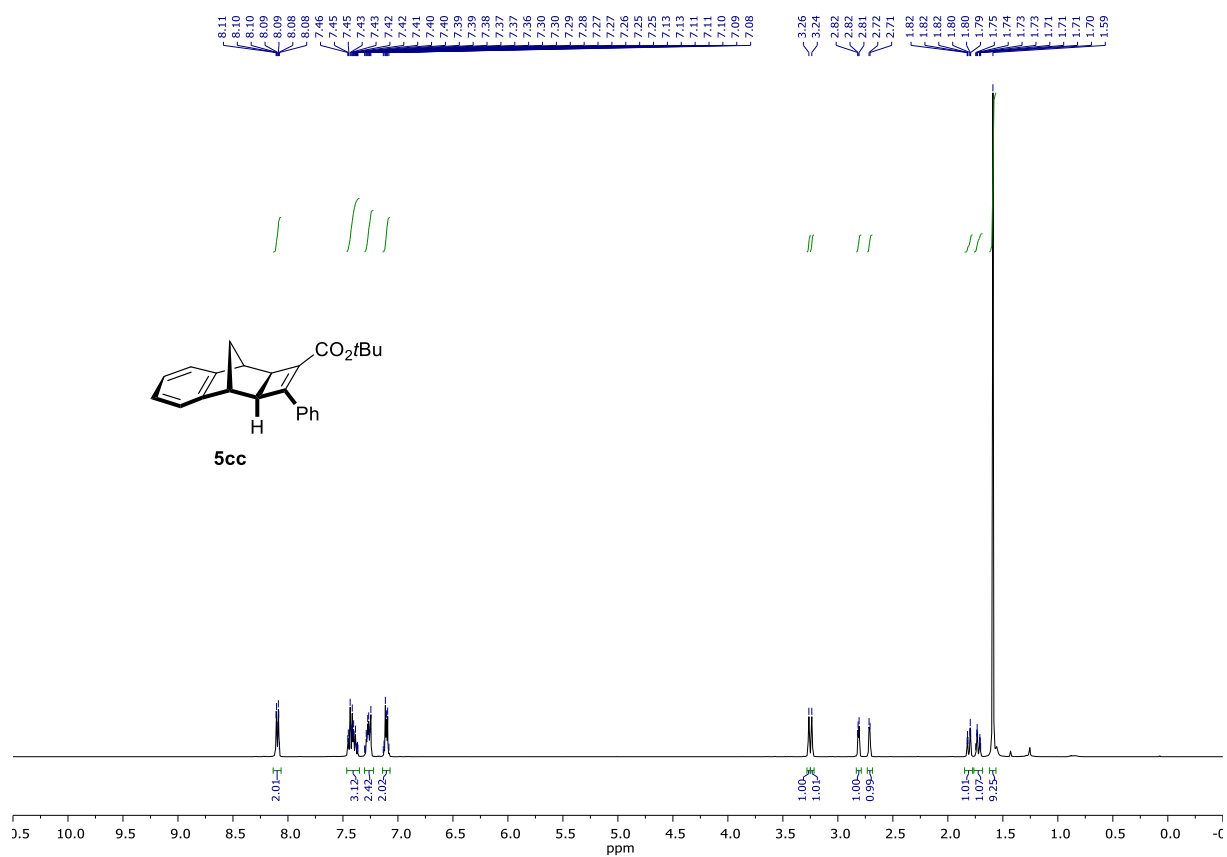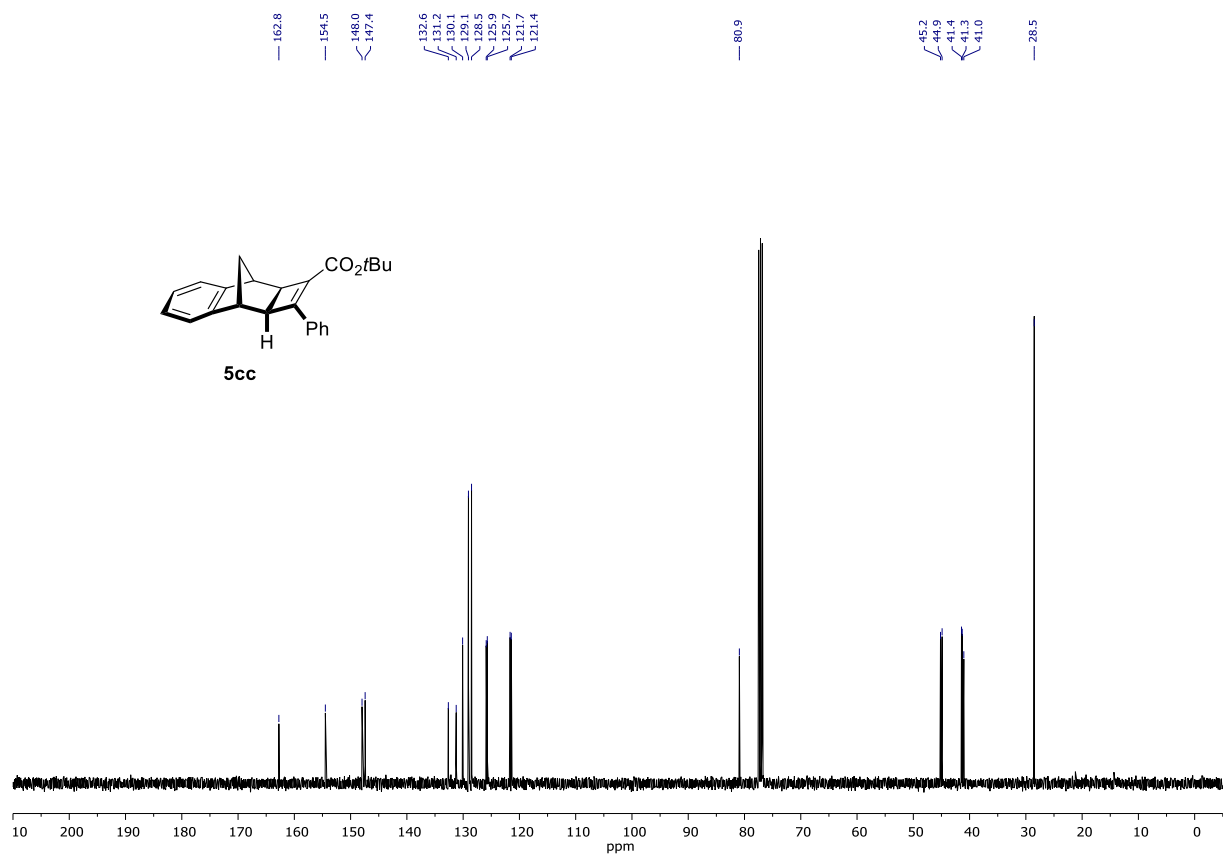

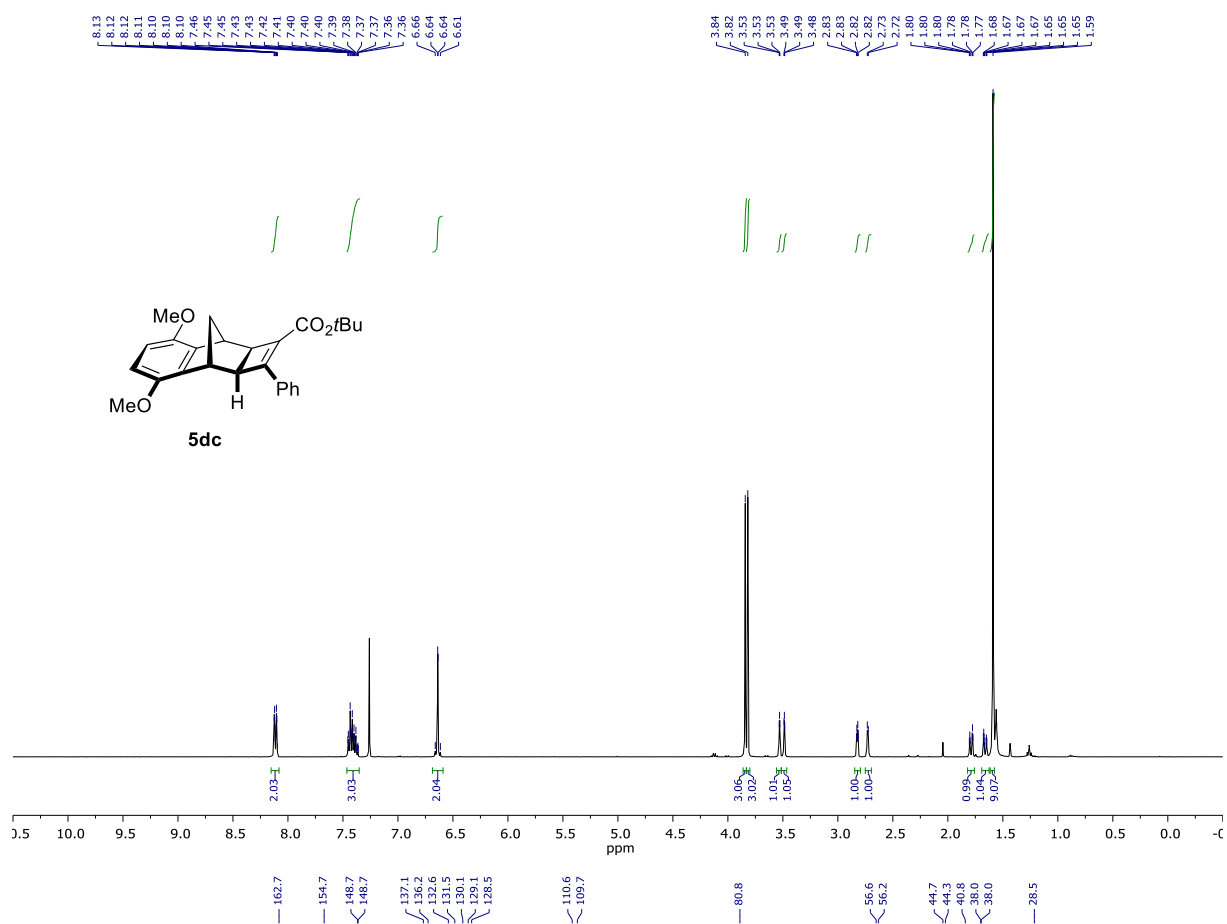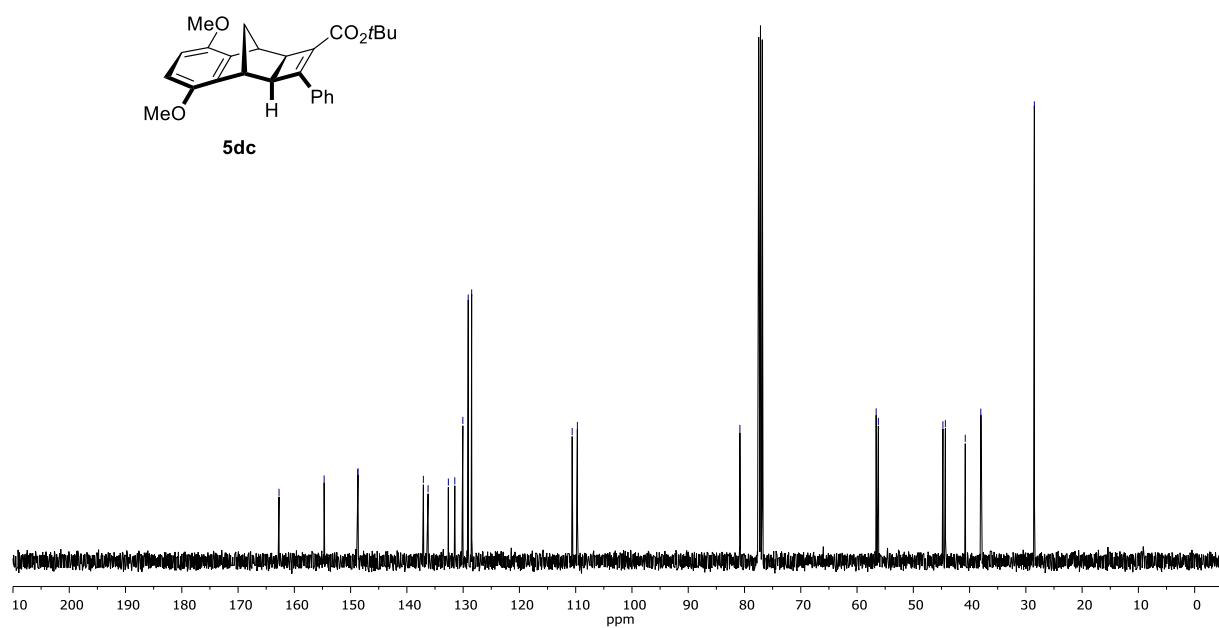

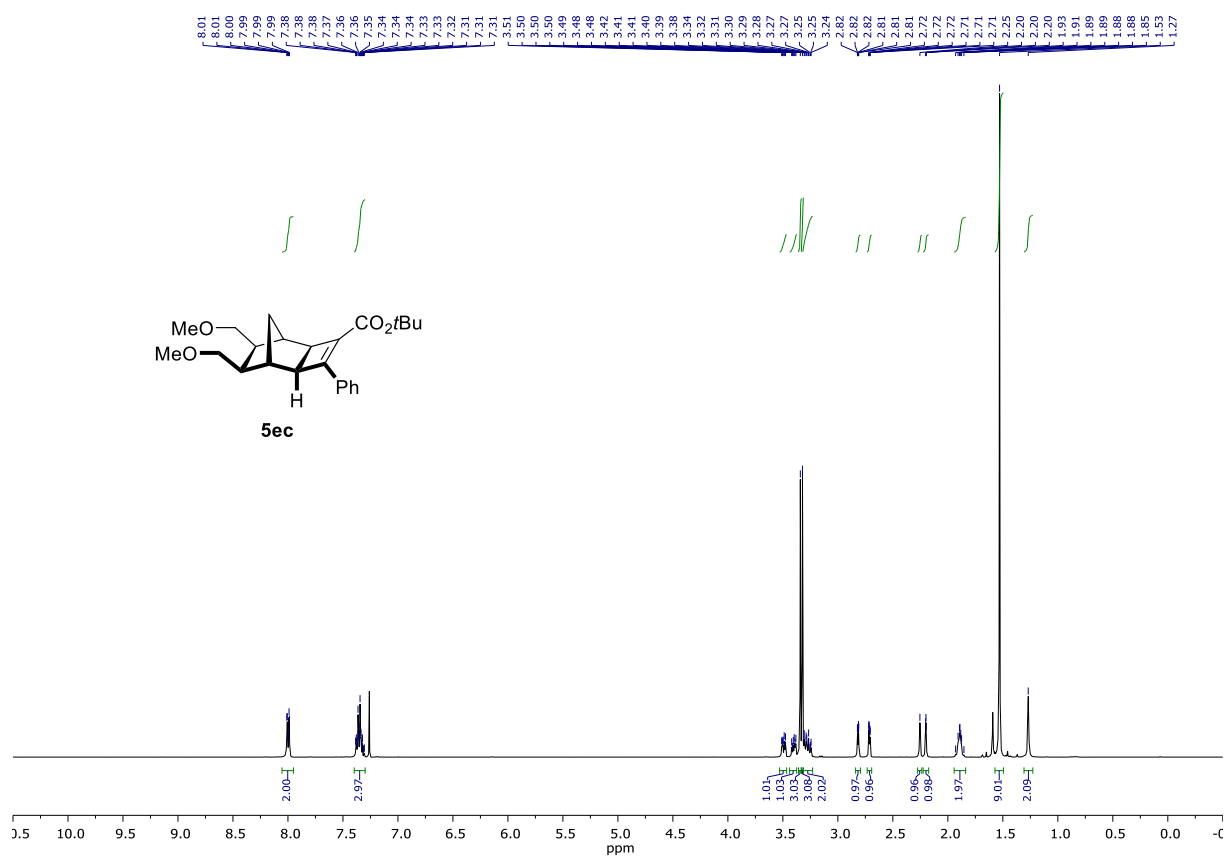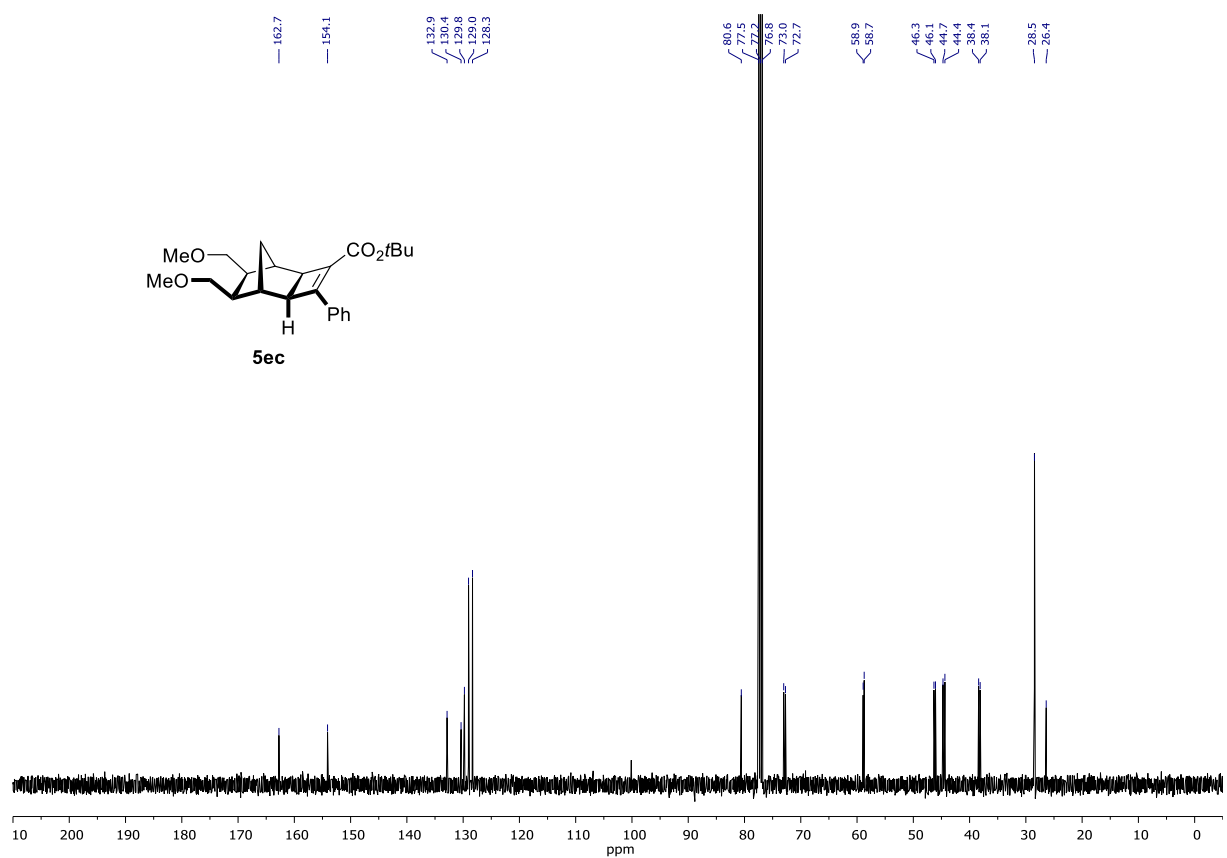

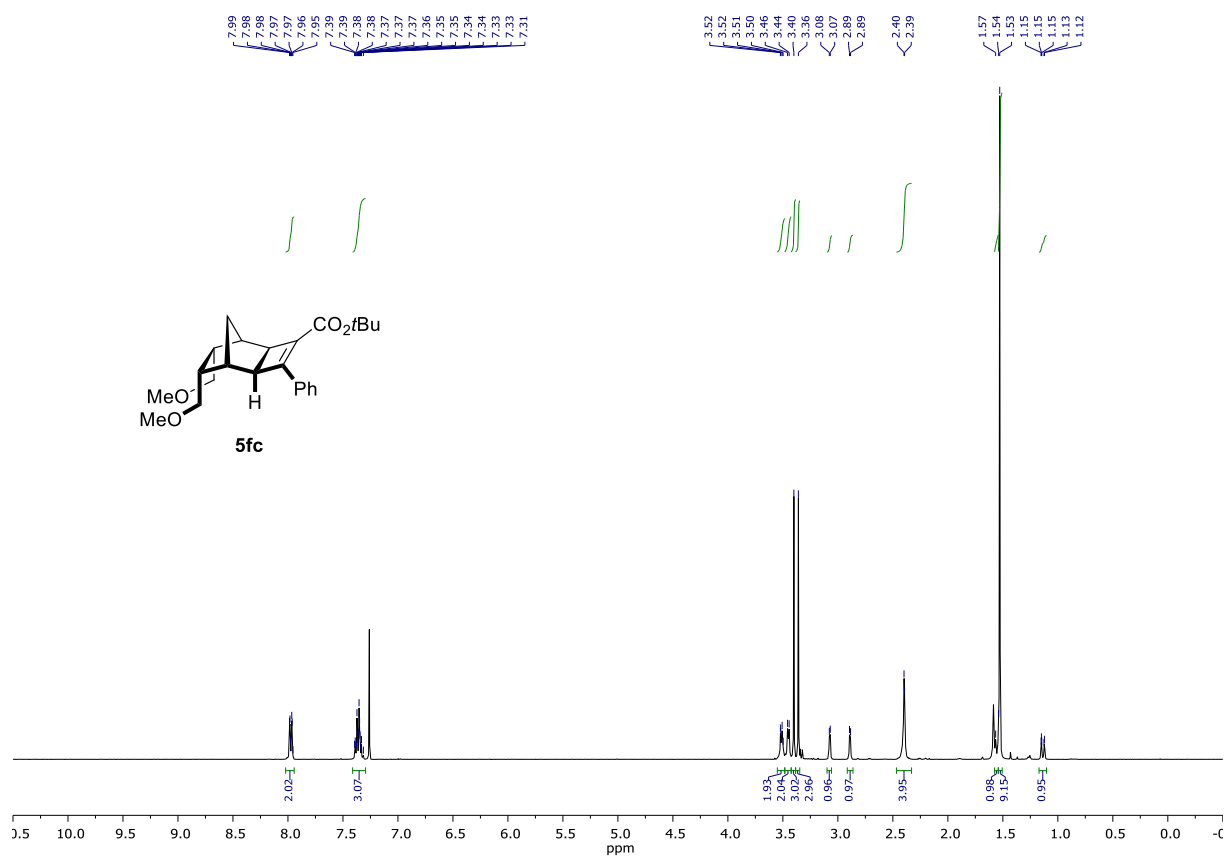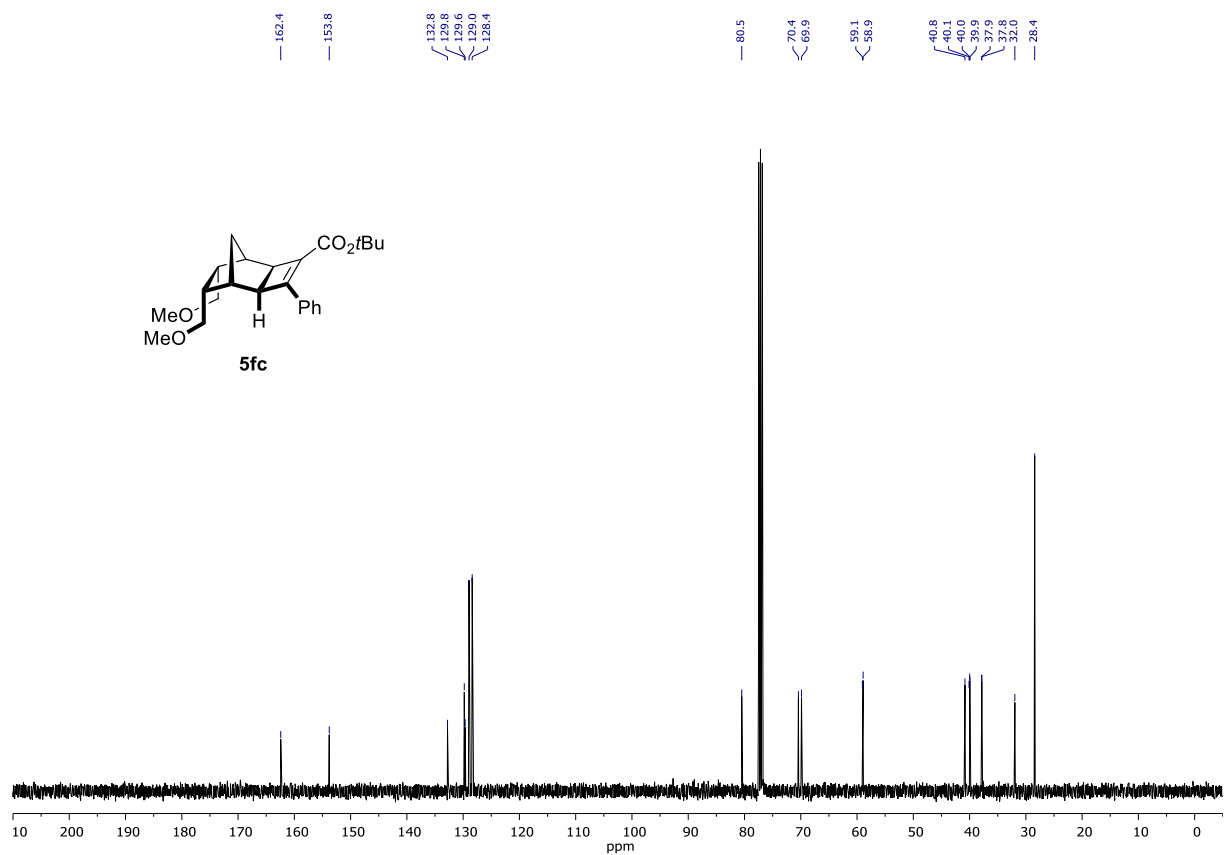

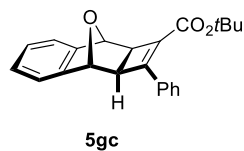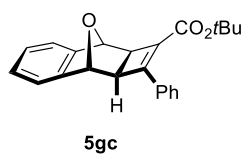

Supplement: c6sc05092a1.pdf [file c6sc05092a1.pdf]
